# Supplementary material for: Proteomic and Antibody Profiles Reveal Antigenic Composition and Signatures of Bacterial Ghost Vaccine of Brucella abortus A19
Source: Front Immunol. 2022 Apr 22;13:874871. doi: 10.3389/fimmu.2022.874871 (PMC9074784; doi:10.3389/fimmu.2022.874871)
Supplement: Supplementary Table 4 — Subcellular location analysis for DEPs in the groups of A19BG and A19. [file Table_4.xlsx]

## Sheet: Up list
Subcellular localization	Protein accession	Protein description	Gene name	A19BG/A19 Ratio	A19BG/A19 P value
Cytoplasmic	Q576Q2	Coenzyme A biosynthesis bifunctional protein CoaBC OS=Brucella abortus biovar 1 (strain 9-941) OX=262698 GN=coaBC PE=3 SV=1	coaBC	2.0405	0.000606278
	Q2YMG6	3-oxoacyl-[acyl-carrier-protein] reductase OS=Brucella abortus (strain 2308) OX=359391 GN=fabG PE=1 SV=1	fabG	1.6052	0.000885783
	Q2YRL4	Flagellar transcriptional regulator FtcR OS=Brucella abortus (strain 2308) OX=359391 GN=BAB1_1538 PE=4 SV=1	BAB1_1538	2.0724	8.2047e-07
	Q2YNK6	Bacterial regulatory proteins, AsnC family OS=Brucella abortus (strain 2308) OX=359391 GN=BAB1_0887 PE=4 SV=1	BAB1_0887	1.5417	0.000952756
	Q2YQG1	Bacterial transferase hexapeptide repeat OS=Brucella abortus (strain 2308) OX=359391 GN=BAB1_1279 PE=1 SV=1	BAB1_1279	1.7164	0.000229388
	Q2YJ42	Bacterial regulatory protein, GntR family OS=Brucella abortus (strain 2308) OX=359391 GN=BAB2_0423 PE=4 SV=1	BAB2_0423	7.2761	3.09645e-06
	Q2YKD7	Bacterial regulatory protein, GntR family:Bacterial regulatory protein, DeoR family OS=Brucella abortus (strain 2308) OX=359391 GN=BAB2_0725 PE=4 SV=1	BAB2_0725	2.6275	0.000830211
	Q2YPM4	Beta sliding clamp OS=Brucella abortus (strain 2308) OX=359391 GN=dnaN PE=3 SV=1	dnaN	1.5531	0.000781404
	Q2YND6	Cys/Met metabolism pyridoxal-phosphate-dependent enzymes:O-acetylhomoserine/O-acetylserine sulfhydrylase OS=Brucella abortus (strain 2308) OX=359391 GN=BAB1_0813 PE=3 SV=1	BAB1_0813	1.7673	9.81436e-05
	Q2YL02	YjgF-like protein:Endoribonuclease L-PSP OS=Brucella abortus (strain 2308) OX=359391 GN=BAB2_0488 PE=3 SV=1	BAB2_0488	1.6781	0.000227557
	Q2YP69	Amidohydrolase 2 OS=Brucella abortus (strain 2308) OX=359391 GN=BAB1_0236 PE=4 SV=1	BAB1_0236	1.6063	1.48813e-05
	Q2YMQ1	Xylulose kinase OS=Brucella abortus (strain 2308) OX=359391 GN=xylB PE=3 SV=1	xylB	2.2553	0.000797968
	Q2YP68	Bacterial regulatory protein, MarR family:Bacterial regulatory proteins, IclR family OS=Brucella abortus (strain 2308) OX=359391 GN=BAB1_0237 PE=4 SV=1	BAB1_0237	2.0668	0.00188338
	Q2YIZ7	Uncharacterized protein OS=Brucella abortus (strain 2308) OX=359391 GN=BAB2_0403 PE=4 SV=1	BAB2_0403	10.7437	7.96021e-06
	Q2YL31	6-phosphogluconolactonase OS=Brucella abortus (strain 2308) OX=359391 GN=pgl PE=3 SV=1	pgl	1.8042	1.59132e-05
	Q2YQP7	Enoyl-CoA hydratase/isomerase OS=Brucella abortus (strain 2308) OX=359391 GN=BAB1_2185 PE=3 SV=1	BAB1_2185	1.9942	8.30069e-05
	Q2YPV3	Pyruvate dehydrogenase E1 component subunit alpha OS=Brucella abortus (strain 2308) OX=359391 GN=pdhA PE=4 SV=1	pdhA	1.7435	5.27638e-06
	Q2YNC1	Uncharacterized protein OS=Brucella abortus (strain 2308) OX=359391 GN=BAB1_0796 PE=4 SV=1	BAB1_0796	1.502	0.0107138
	Q2YPF7	Bacterial regulatory protein TetR, HTH motif OS=Brucella abortus (strain 2308) OX=359391 GN=BAB1_0311 PE=4 SV=1	BAB1_0311	1.6036	0.000265388
	Q2YIJ6	Fumarate hydratase class II OS=Brucella abortus (strain 2308) OX=359391 GN=fumC PE=3 SV=1	fumC	1.8796	0.0074654
	Q2YP90	Short-chain dehydrogenase/reductase SDR:Glucose/ribitol dehydrogenase OS=Brucella abortus (strain 2308) OX=359391 GN=BAB1_0246 PE=4 SV=1	BAB1_0246	1.6657	0.00155521
	Q2YQ38	ATP/GTP-binding site motif A (P-loop):YcjX-like protein OS=Brucella abortus (strain 2308) OX=359391 GN=BAB1_1054 PE=4 SV=1	BAB1_1054	2.5145	8.36094e-05
	Q2YL60	ATP-dependent protease La, LON OS=Brucella abortus (strain 2308) OX=359391 GN=BAB2_0344 PE=4 SV=1	BAB2_0344	2.8484	0.000715064
	Q2YP48	Aminotransferase class-III:Maltose binding protein OS=Brucella abortus (strain 2308) OX=359391 GN=BAB1_0191 PE=3 SV=1	BAB1_0191	1.6275	0.00161608
	Q2YL65	Thiolase OS=Brucella abortus (strain 2308) OX=359391 GN=BAB2_0443 PE=3 SV=1	BAB2_0443	1.5387	0.00198636
	Q2YMC9	Heat shock protein DnaJ, N-terminal:Chaperone DnaJ, C-terminal:Heat shock protein DnaJ OS=Brucella abortus (strain 2308) OX=359391 GN=BAB1_0446 PE=4 SV=1	BAB1_0446	3.5224	1.01765e-05
	Q2YME1	Threonylcarbamoyl-AMP synthase OS=Brucella abortus (strain 2308) OX=359391 GN=BAB1_0434 PE=3 SV=1	BAB1_0434	1.988	0.000107508
	Q2YL89	Sigma-70 region 2 OS=Brucella abortus (strain 2308) OX=359391 GN=BAB2_0020 PE=3 SV=1	BAB2_0020	2.4765	0.00297857
	Q2YJP4	Glutathione S-transferase, N-terminal:Glutathione S-transferase, C-terminal OS=Brucella abortus (strain 2308) OX=359391 GN=BAB2_1005 PE=4 SV=1	BAB2_1005	2.3825	8.28271e-05
	Q2YMH3	SAM (And some other nucleotide) binding motif:Generic methyltransferase:Cyclopropane-fatty-acyl-phospholipid synthase OS=Brucella abortus (strain 2308) OX=359391 GN=cfa PE=3 SV=1	cfa	1.5061	0.00105549
	Q2YRI7	Uncharacterized protein OS=Brucella abortus (strain 2308) OX=359391 GN=BAB1_1195 PE=4 SV=1	BAB1_1195	1.6629	0.00084253
	Q2YNJ0	Glyoxalase/Bleomycin resistance protein/dioxygenase domain OS=Brucella abortus (strain 2308) OX=359391 GN=BAB1_0867 PE=4 SV=1	BAB1_0867	6.4626	3.99719e-06
	Q2YPS4	Phosphoglucomutase/phosphomannomutase:Phosphogluc omutase/phosphomannomutase C terminal:Phosphoglucomutase/phosphomannomutase OS=Brucella abortus (strain 2308) OX=359391 GN=pgm PE=3 SV=1	pgm	1.5862	0.000764168
	Q2YJ20	2-keto-3-deoxy-galactonokinase OS=Brucella abortus (strain 2308) OX=359391 GN=BAB2_0295 PE=4 SV=1	BAB2_0295	2.2574	0.000109032
	Q2YMD9	Plasmid stabilization system OS=Brucella abortus (strain 2308) OX=359391 GN=BAB1_0436 PE=3 SV=1	BAB1_0436	3.8262	0.000263055
	Q2YJA2	ParB-like nuclease:ParB-like partition protein OS=Brucella abortus (strain 2308) OX=359391 GN=BAB2_1164 PE=3 SV=1	BAB2_1164	1.8	0.000144532
	Q2YP80	Bacterial regulatory protein, MerR family:ATP/GTP-binding site motif A (P-loop) OS=Brucella abortus (strain 2308) OX=359391 GN=BAB1_0222 PE=4 SV=1	BAB1_0222	2.7872	9.87452e-05
	Q2YII2	Aldo/keto reductase OS=Brucella abortus (strain 2308) OX=359391 GN=BAB2_0177 PE=1 SV=1	BAB2_0177	2.2569	1.74299e-05
	Q2YPX9	Bacterial regulatory protein, GntR family OS=Brucella abortus (strain 2308) OX=359391 GN=BAB1_1124 PE=4 SV=1	BAB1_1124	9.4976	1.02149e-05
	Q2YN14	NYN domain-containing protein OS=Brucella abortus (strain 2308) OX=359391 GN=BAB1_0669 PE=4 SV=1	BAB1_0669	1.922	0.000375647
	Q2YK25	Phosphoglucomutase/phosphomannomutase:Phosphogluc omutase/phosphomannomutase C terminal:Phosphoglucomutase/phosphomannomutase OS=Brucella abortus (strain 2308) OX=359391 GN=BAB2_0855 PE=3 SV=1	BAB2_0855	1.5936	0.000170224
	Q2YIL1	Helix-turn-helix motif:Cupin domain OS=Brucella abortus (strain 2308) OX=359391 GN=BAB2_0310 PE=4 SV=1	BAB2_0310	2.6266	6.24932e-05
	Q2YNB2	Conserved domain protein OS=Brucella abortus (strain 2308) OX=359391 GN=BAB1_0805 PE=4 SV=1	BAB1_0805	2.4104	0.00262538
	Q2YQ10	Nitrilotriacetate monooxygenase component B OS=Brucella abortus (strain 2308) OX=359391 GN=BAB1_1090 PE=4 SV=1	BAB1_1090	1.9662	0.000107619
	Q2YPR9	Fumarylacetoacetate (FAA) hydrolase OS=Brucella abortus (strain 2308) OX=359391 GN=BAB1_0060 PE=4 SV=1	BAB1_0060	1.7492	0.0237837
	Q2YPU0	Uncharacterized protein OS=Brucella abortus (strain 2308) OX=359391 GN=BAB1_1423 PE=4 SV=1	BAB1_1423	1.6522	0.00250236
	Q2YJS1	DNA gyrase, subunit B:Short-chain dehydrogenase/reductase SDR:Glucose/ribitol dehydrogenase OS=Brucella abortus (strain 2308) OX=359391 GN=BAB2_0975 PE=1 SV=1	BAB2_0975	1.6829	0.00162686
	Q2YKL9	Dihydroorotase multifunctional complex type:Amidohydrolase OS=Brucella abortus (strain 2308) OX=359391 GN=BAB2_0640 PE=4 SV=1	BAB2_0640	1.5125	0.000213401
	Q2YMJ4	Endolytic murein transglycosylase OS=Brucella abortus (strain 2308) OX=359391 GN=mltG PE=3 SV=1	mltG	1.5971	0.00309247
	Q2YNZ8	Response regulator receiver:Helix-turn-helix, Fis-type OS=Brucella abortus (strain 2308) OX=359391 GN=BAB1_0136 PE=4 SV=1	BAB1_0136	1.794	0.000613314
	Q2YM48	Esterase/lipase/thioesterase, active site:Prolyl aminopeptidase S33 OS=Brucella abortus (strain 2308) OX=359391 GN=BAB1_1476 PE=4 SV=1	BAB1_1476	1.8081	0.000382764
	Q2YL54	Bacterial regulatory protein, MarR family OS=Brucella abortus (strain 2308) OX=359391 GN=BAB2_0350 PE=4 SV=1	BAB2_0350	1.6626	0.0022559
	Q2YIS7	Bacterial regulatory protein LysR, HTH motif:LysR substrate binding domain OS=Brucella abortus (strain 2308) OX=359391 GN=BAB2_0161 PE=3 SV=1	BAB2_0161	1.8786	0.00214305
	Q2YJ26	Modulator of DNA gyrase OS=Brucella abortus (strain 2308) OX=359391 GN=pmbA PE=3 SV=1	pmbA	1.8132	6.94383e-05
	Q2YJM9	Endonuclease/exonuclease/phosphatase family OS=Brucella abortus (strain 2308) OX=359391 GN=BAB2_1020 PE=4 SV=1	BAB2_1020	1.6215	0.0454611
	Q2YIS4	Citrate lyase, beta subunit, putative OS=Brucella abortus (strain 2308) OX=359391 GN=BAB2_0164 PE=3 SV=1	BAB2_0164	2.1756	0.00142174
	Q2YKA7	Bacterial regulatory protein, MarR family OS=Brucella abortus (strain 2308) OX=359391 GN=BAB2_0757 PE=4 SV=1	BAB2_0757	2.5292	0.00119958
	Q2YIY5	DUF190 domain-containing protein OS=Brucella abortus (strain 2308) OX=359391 GN=BAB2_0415 PE=3 SV=1	BAB2_0415	1.5467	0.0031016
	Q2YNV5	Phenazine biosynthesis PhzC/PhzF protein OS=Brucella abortus (strain 2308) OX=359391 GN=BAB1_0110 PE=3 SV=1	BAB1_0110	1.7518	0.00843093
	Q2YIL4	Amidohydrolase OS=Brucella abortus (strain 2308) OX=359391 GN=BAB2_0307 PE=1 SV=1	BAB2_0307	3.2565	2.03885e-05
	Q2YJK4	Acyl-CoA dehydrogenase, C-terminal:Acyl-CoA dehydrogenase, central domain:Acyl-CoA dehydrogenase, N-terminal OS=Brucella abortus (strain 2308) OX=359391 GN=BAB2_1047 PE=3 SV=1	BAB2_1047	2.3805	0.015806
	Q2YJT0	Dihydrodipicolinate synthetase OS=Brucella abortus (strain 2308) OX=359391 GN=BAB2_0961 PE=3 SV=1	BAB2_0961	1.9395	8.99742e-05
	Q2YNC0	Phosphate acyltransferase OS=Brucella abortus (strain 2308) OX=359391 GN=plsX PE=3 SV=1	plsX	4.1887	2.21901e-06
	Q2YP58	Thiazole synthase OS=Brucella abortus (strain 2308) OX=359391 GN=thiG PE=3 SV=1	thiG	3.8205	1.1729e-05
	Q2YPB9	UPF0262 protein BAB1_0284 OS=Brucella abortus (strain 2308) OX=359391 GN=BAB1_0284 PE=3 SV=1	BAB1_0284	1.6179	0.00639376
	Q2YRK5	Malate synthase G OS=Brucella abortus (strain 2308) OX=359391 GN=glcB PE=3 SV=1	glcB	1.5404	0.000110018
	Q2YQS6	Endoribonuclease YbeY OS=Brucella abortus (strain 2308) OX=359391 GN=ybeY PE=3 SV=2	ybeY	2.9575	0.000275987
	Q2YQM7	Pyridoxine 5'-phosphate synthase OS=Brucella abortus (strain 2308) OX=359391 GN=pdxJ PE=3 SV=1	pdxJ	1.5898	0.00470791
	Q2YJP0	Methylglyoxal synthase OS=Brucella abortus (strain 2308) OX=359391 GN=mgsA PE=3 SV=1	mgsA	1.7164	0.000399945
	Q2YPU9	2-dehydro-3-deoxyphosphooctonate aldolase OS=Brucella abortus (strain 2308) OX=359391 GN=kdsA PE=3 SV=1	kdsA	1.9074	5.44415e-05
	Q2YNB8	Integration host factor subunit alpha OS=Brucella abortus (strain 2308) OX=359391 GN=ihfA PE=3 SV=1	ihfA	2.6614	0.000106946
	Q2YQZ3	ATP-dependent protease subunit HslV OS=Brucella abortus (strain 2308) OX=359391 GN=hslV PE=3 SV=1	hslV	2.2967	0.00361549
	Q2YPY4	Phosphopantetheine adenylyltransferase OS=Brucella abortus (strain 2308) OX=359391 GN=coaD PE=3 SV=1	coaD	2.0121	0.000485182
	Q2YQZ2	Imidazoleglycerol-phosphate dehydratase OS=Brucella abortus (strain 2308) OX=359391 GN=hisB PE=3 SV=1	hisB	1.6835	0.000222669
	Q2YM57	Adenine phosphoribosyltransferase OS=Brucella abortus (strain 2308) OX=359391 GN=apt PE=3 SV=2	apt	1.9124	0.000678609
	Q2YKN1	Polar-differentiation response regulator DivK OS=Brucella abortus (strain 2308) OX=359391 GN=divK PE=3 SV=1	divK	2.3415	0.000176938
	Q2YIJ2	10 kDa chaperonin OS=Brucella abortus (strain 2308) OX=359391 GN=groS PE=3 SV=1	groS	3.5838	4.50265e-06
	Q2YRG4	Deoxyuridine 5'-triphosphate nucleotidohydrolase OS=Brucella abortus (strain 2308) OX=359391 GN=dut PE=1 SV=1	dut	1.6549	0.002867
	Q2YIL8	Urocanate hydratase OS=Brucella abortus (strain 2308) OX=359391 GN=hutU PE=3 SV=1	hutU	5.2895	6.69537e-07
	Q2YS10	Oxygen-dependent coproporphyrinogen-III oxidase OS=Brucella abortus (strain 2308) OX=359391 GN=hemF PE=3 SV=1	hemF	1.7169	0.000178762
	Q2YNK0	Deoxyguanosinetriphosphate triphosphohydrolase-like protein OS=Brucella abortus (strain 2308) OX=359391 GN=BAB1_0895 PE=3 SV=1	BAB1_0895	1.9074	0.000846051
	Q2YRN8	Transcription elongation factor GreA OS=Brucella abortus (strain 2308) OX=359391 GN=greA PE=3 SV=1	greA	1.6785	0.000138859
	Q2YLM5	Porphobilinogen deaminase OS=Brucella abortus (strain 2308) OX=359391 GN=hemC PE=3 SV=1	hemC	1.511	0.00207301
	Q2YLU8	Hydroxyacylglutathione hydrolase OS=Brucella abortus (strain 2308) OX=359391 GN=gloB PE=3 SV=1	gloB	1.6693	0.00447625
	Q2YPV0	Enolase OS=Brucella abortus (strain 2308) OX=359391 GN=eno PE=3 SV=1	eno	1.64	0.000100416
	Q2YPX1	ATP-dependent Clp protease proteolytic subunit OS=Brucella abortus (strain 2308) OX=359391 GN=clpP PE=3 SV=1	clpP	1.8907	0.000290721
	Q2YS31	tRNA dimethylallyltransferase OS=Brucella abortus (strain 2308) OX=359391 GN=miaA PE=3 SV=1	miaA	2.0649	0.0131031
	Q2YKB2	Homoserine O-acetyltransferase OS=Brucella abortus (strain 2308) OX=359391 GN=metAA PE=3 SV=1	metAA	2.9195	0.000414326
	Q2YS22	Thymidylate synthase OS=Brucella abortus (strain 2308) OX=359391 GN=thyA PE=3 SV=1	thyA	1.8038	0.000268426
	Q2YN94	Transcriptional repressor NrdR OS=Brucella abortus (strain 2308) OX=359391 GN=nrdR PE=3 SV=1	nrdR	1.9183	0.000429223
	Q2YP38	Helix-turn-helix, Fis-type OS=Brucella abortus (strain 2308) OX=359391 GN=BAB1_0201 PE=4 SV=1	BAB1_0201	3.012	0.000149613
	Q2YMQ2	Xylose isomerase OS=Brucella abortus (strain 2308) OX=359391 GN=xylA PE=3 SV=1	xylA	1.5313	0.00247801
	Q2YPX7	Single-stranded DNA-binding protein OS=Brucella abortus (strain 2308) OX=359391 GN=ssb PE=3 SV=1	ssb	1.6193	0.00109284
	Q2YLA5	Class II aldolase/adducin, N-terminal OS=Brucella abortus (strain 2308) OX=359391 GN=BAB2_0141 PE=4 SV=1	BAB2_0141	1.7552	0.00758774
	Q2YIM1	MaoC-like dehydratase OS=Brucella abortus (strain 2308) OX=359391 GN=BAB2_0266 PE=4 SV=1	BAB2_0266	1.712	0.000191536
	Q2YPZ4	Acyl-CoA dehydrogenase:Acyl-CoA dehydrogenase, C-terminal:Acyl-CoA dehydrogenase, central domain:Acyl-CoA dehydrogenase, N-te OS=Brucella abortus (strain 2308) OX=359391 GN=BAB1_1109 PE=1 SV=1	BAB1_1109	2.5985	2.98305e-05
	Q2YRM2	UvrABC system protein B OS=Brucella abortus (strain 2308) OX=359391 GN=uvrB PE=3 SV=1	uvrB	1.5758	0.000381102
	Q2YJD4	Aminotransferase class-III OS=Brucella abortus (strain 2308) OX=359391 GN=BAB2_1125 PE=3 SV=1	BAB2_1125	3.028	0.000399002
	Q2YN31	Dihydroorotase:Dihydroorotase multifunctional complex type:Amidohydrolase OS=Brucella abortus (strain 2308) OX=359391 GN=pyrC-1 PE=3 SV=1	pyrC-1	2.2984	2.09309e-06
	Q2YQH0	CBS domain OS=Brucella abortus (strain 2308) OX=359391 GN=BAB1_1274 PE=4 SV=1	BAB1_1274	4.1644	6.72758e-05
	Q2YMS4	Prokaryotic transcription elongation factor GreA/GreB OS=Brucella abortus (strain 2308) OX=359391 GN=BAB1_0580 PE=4 SV=1	BAB1_0580	8.812	0.000224431
	Q2YQ20	Cysteine synthase/cystathionine beta-synthase P-phosphate attachment site:Pyridoxal-5'-phosphate-dependent enzyme, beta family OS=Brucella abortus (strain 2308) OX=359391 GN=BAB1_1073 PE=4 SV=1	BAB1_1073	1.6981	6.2265e-05
	Q2YIE9	Heat shock protein Hsp20 OS=Brucella abortus (strain 2308) OX=359391 GN=BAB2_0050 PE=3 SV=1	BAB2_0050	24.5483	3.75064e-07
	Q2YQV2	Chaperone protein DnaK OS=Brucella abortus (strain 2308) OX=359391 GN=dnaK PE=2 SV=1	dnaK	2.0825	1.16036e-05
	Q2YIU0	Bacterial regulatory protein, GntR family OS=Brucella abortus (strain 2308) OX=359391 GN=BAB2_0322 PE=4 SV=1	BAB2_0322	18.6518	6.04566e-06
	Q2YL13	Ribosomal RNA small subunit methyltransferase E OS=Brucella abortus (strain 2308) OX=359391 GN=BAB2_0477 PE=3 SV=1	BAB2_0477	1.8697	3.9065e-05
	Q2YQY5	Class I peptide chain release factor domain OS=Brucella abortus (strain 2308) OX=359391 GN=BAB1_2089 PE=3 SV=1	BAB1_2089	2.3381	0.0301564
	Q2YKN3	Prokaryotic transcription elongation factor GreA/GreB OS=Brucella abortus (strain 2308) OX=359391 GN=BAB2_0626 PE=4 SV=1	BAB2_0626	3.5896	1.97761e-05
	Q2YMF5	Exodeoxyribonuclease 7 small subunit OS=Brucella abortus (strain 2308) OX=359391 GN=xseB PE=3 SV=1	xseB	1.5607	0.00175018
	Q2YKT9	Hydantoinase/oxoprolinase:Hydantoinase B/oxoprolinase OS=Brucella abortus (strain 2308) OX=359391 GN=BAB2_0559 PE=3 SV=1	BAB2_0559	1.7176	6.71903e-05
	Q2YPV5	Acetyltransferase component of pyruvate dehydrogenase complex OS=Brucella abortus (strain 2308) OX=359391 GN=aceF PE=3 SV=1	aceF	1.9619	0.000116255
	Q2YKS6	Probable branched-chain-amino-acid aminotransferase OS=Brucella abortus (strain 2308) OX=359391 GN=BAB2_0572 PE=1 SV=1	BAB2_0572	1.7987	2.43417e-05
	Q2YKY8	Iron-containing alcohol dehydrogenase OS=Brucella abortus (strain 2308) OX=359391 GN=BAB2_0506 PE=4 SV=1	BAB2_0506	1.8051	0.0032639
	Q2YJK9	Bacterial regulatory proteins, IclR family OS=Brucella abortus (strain 2308) OX=359391 GN=BAB2_1041 PE=4 SV=1	BAB2_1041	1.9957	0.000114756
	Q2YLB1	Bacterial regulatory protein, GntR family OS=Brucella abortus (strain 2308) OX=359391 GN=BAB2_0290 PE=4 SV=1	BAB2_0290	4.2062	0.000706745
	Q2YR64	Cyclic nucleotide-binding domain:cAMP-dependent protein kinase:Delta crystallin OS=Brucella abortus (strain 2308) OX=359391 GN=BAB1_2005 PE=4 SV=1	BAB1_2005	1.9427	0.0420334
	Q2YP35	Protein GrpE OS=Brucella abortus (strain 2308) OX=359391 GN=grpE PE=3 SV=1	grpE	3.7779	3.74342e-06
	Q2YKP6	NAD binding site:UBA/THIF-type NAD/FAD binding fold:Pyridine nucleotide-disulphide oxidoreductase, class I OS=Brucella abortus (strain 2308) OX=359391 GN=BAB2_0610 PE=4 SV=1	BAB2_0610	1.853	0.000671326
	Q2YKQ3	Bacterial regulatory protein LysR, HTH motif:LysR substrate binding domain OS=Brucella abortus (strain 2308) OX=359391 GN=BAB2_0599 PE=3 SV=1	BAB2_0599	1.8239	0.0014106
	Q2YM63	Ribosomal RNA small subunit methyltransferase H OS=Brucella abortus (strain 2308) OX=359391 GN=rsmH PE=3 SV=1	rsmH	1.7272	0.00015094
	Q2YRP7	Ribosome-recycling factor OS=Brucella abortus (strain 2308) OX=359391 GN=frr PE=3 SV=1	frr	1.8867	7.07597e-07
	Q2YQI4	GCN5-related N-acetyltransferase OS=Brucella abortus (strain 2308) OX=359391 GN=BAB1_1696 PE=4 SV=1	BAB1_1696	2.1214	0.000121995
	Q2YRZ7	Bacterial regulatory protein, DeoR family OS=Brucella abortus (strain 2308) OX=359391 GN=BAB1_1747 PE=4 SV=1	BAB1_1747	2.4647	0.000110536
	Q2YK85	Bacterial regulatory protein, ArsR family OS=Brucella abortus (strain 2308) OX=359391 GN=BAB2_0780 PE=4 SV=1	BAB2_0780	2.8118	5.29816e-05
	Q578L4	Transcriptional regulator, hypothetical OS=Brucella abortus biovar 1 (strain 9-941) OX=262698 GN=BruAb2_0501 PE=4 SV=1	BruAb2_0501	1.8294	0.00514196
	Q578K7	Proline dehydrogenase transcriptional activator OS=Brucella abortus biovar 1 (strain 9-941) OX=262698 GN=BruAb2_0508 PE=4 SV=1	BruAb2_0508	2.1838	9.79658e-05
	Q57F06	Guanine deaminase OS=Brucella abortus biovar 1 (strain 9-941) OX=262698 GN=BruAb1_0380 PE=3 SV=1	BruAb1_0380	2.1126	0.000878974
	Q579G9	Transcriptional regulator, LysR family OS=Brucella abortus biovar 1 (strain 9-941) OX=262698 GN=BruAb2_0281 PE=3 SV=1	BruAb2_0281	1.812	0.00268706
	Q57BV2	2-isopropylmalate synthase OS=Brucella abortus biovar 1 (strain 9-941) OX=262698 GN=leuA PE=3 SV=1	leuA	1.6014	1.05292e-05
	Q57FV6	Transcriptional regulator, LysR family OS=Brucella abortus biovar 1 (strain 9-941) OX=262698 GN=BruAb1_0060 PE=3 SV=1	BruAb1_0060	1.5277	0.00215585
	Q57CV0	Uncharacterized protein OS=Brucella abortus biovar 1 (strain 9-941) OX=262698 GN=BruAb1_1196 PE=4 SV=1	BruAb1_1196	12.0737	0.000391885
	Q57B92	Transcriptional regulator, GntR family OS=Brucella abortus biovar 1 (strain 9-941) OX=262698 GN=BruAb1_1775 PE=4 SV=1	BruAb1_1775	2.9519	5.20351e-05
	Q577K0	Putative N-acetylmannosamine-6-phosphate 2-epimerase OS=Brucella abortus biovar 1 (strain 9-941) OX=262698 GN=nanE PE=3 SV=1	nanE	1.5744	0.00193089
	Q579J8	Hypothetical transcriptional regulator OS=Brucella abortus biovar 1 (strain 9-941) OX=262698 GN=BruAb2_0250 PE=4 SV=1	BruAb2_0250	1.5221	0.0021113
	Q57A52	Hypothetical 3-oxoacyl-(Acyl-carrier-protein) reductase OS=Brucella abortus biovar 1 (strain 9-941) OX=262698 GN=BruAb2_0030 PE=4 SV=1	BruAb2_0030	1.7582	0.0301398
	Q579S9	CAIB/BAIF family protein OS=Brucella abortus biovar 1 (strain 9-941) OX=262698 GN=BruAb2_0161 PE=4 SV=1	BruAb2_0161	2.0135	2.26492e-05
	Q57BQ7	7-alpha-hydroxysteroid dehydrogenase OS=Brucella abortus biovar 1 (strain 9-941) OX=262698 GN=BruAb1_1604 PE=4 SV=1	BruAb1_1604	1.6102	0.000713997
	Q57A12	UTP--glucose-1-phosphate uridylyltransferase OS=Brucella abortus biovar 1 (strain 9-941) OX=262698 GN=galU PE=3 SV=1	galU	1.7157	0.000506991
	Q2YRL5	Bacterial regulatory protein, MarR family OS=Brucella abortus (strain 2308) OX=359391 GN=BAB1_1537 PE=4 SV=1	BAB1_1537	2.7539	9.00876e-05
	Q578W6	Type I restriction enzyme R Protein OS=Brucella abortus biovar 1 (strain 9-941) OX=262698 GN=hsdR PE=3 SV=1	hsdR	2.7473	0.00180336
	Q579J9	Hypothetical creatinine amidohydrolase OS=Brucella abortus biovar 1 (strain 9-941) OX=262698 GN=BruAb2_0248 PE=3 SV=1	BruAb2_0248	1.7477	0.0323286
	Q578D8	Protocatechuate 3,4-dioxygenase, alpha subunit OS=Brucella abortus biovar 1 (strain 9-941) OX=262698 GN=pcaG PE=3 SV=1	pcaG	1.5336	0.000250712
	Q578G8	HTH marR-type domain-containing protein OS=Brucella abortus biovar 1 (strain 9-941) OX=262698 GN=BruAb2_0549 PE=4 SV=1	BruAb2_0549	3.0923	7.64536e-05
	Q57AT3	EtfB, electron transfer flavoprotein, beta subunit OS=Brucella abortus biovar 1 (strain 9-941) OX=262698 GN=etfB PE=3 SV=1	etfB	1.8997	5.48746e-05
	Q57BK4	Transcriptional regulator, AsnC family OS=Brucella abortus biovar 1 (strain 9-941) OX=262698 GN=BruAb1_1661 PE=4 SV=1	BruAb1_1661	1.6931	0.00100758
	Q57FK4	Heat-inducible transcription repressor HrcA OS=Brucella abortus biovar 1 (strain 9-941) OX=262698 GN=hrcA PE=3 SV=1	hrcA	2.1271	6.62817e-05
	Q57DV6	Uncharacterized protein OS=Brucella abortus biovar 1 (strain 9-941) OX=262698 GN=BruAb1_0811 PE=4 SV=1	BruAb1_0811	1.5729	0.000375346
	Q57CG6	D-ribose pyranase OS=Brucella abortus biovar 1 (strain 9-941) OX=262698 GN=fucU PE=4 SV=1	fucU	2.4964	6.23213e-05
	Q57BZ2	CsaA, csaA protein OS=Brucella abortus biovar 1 (strain 9-941) OX=262698 GN=csaA PE=4 SV=1	csaA	3.8226	0.00205819
	Q578J3	Alkyl hydroperoxide reductase C OS=Brucella abortus biovar 1 (strain 9-941) OX=262698 GN=ahpC PE=3 SV=1	ahpC	1.6118	4.01394e-05
	Q57FB6	Transcriptional regulator(predicted) OS=Brucella abortus biovar 1 (strain 9-941) OX=262698 GN=BruAb1_0263 PE=4 SV=1	BruAb1_0263	2.4309	0.000522506
	Q57BQ6	Hypothetical 7-alpha-hydroxysteroid dehydrogenase OS=Brucella abortus biovar 1 (strain 9-941) OX=262698 GN=BruAb1_1605 PE=4 SV=1	BruAb1_1605	1.8817	0.000401004
	Q57FH6	Alcohol dehydrogenase, zinc-containing OS=Brucella abortus biovar 1 (strain 9-941) OX=262698 GN=BruAb1_0198 PE=3 SV=1	BruAb1_0198	1.5404	0.00164829
	Q57FG8	Aminopyrimidine aminohydrolase OS=Brucella abortus biovar 1 (strain 9-941) OX=262698 GN=BruAb1_0207 PE=3 SV=1	BruAb1_0207	2.0277	6.21676e-05
	Q57CW9	ATP-dependent Clp protease adapter protein ClpS OS=Brucella abortus biovar 1 (strain 9-941) OX=262698 GN=clpS PE=3 SV=1	clpS	2.3385	0.000874301
	Q578D9	Hypothetical 3-carboxy-cis,cis-muconate cycloisomerase OS=Brucella abortus biovar 1 (strain 9-941) OX=262698 GN=BruAb2_0579 PE=4 SV=1	BruAb2_0579	2.164	0.000348073
	Q57EV3	Acyl-CoA dehydrogenase family protein OS=Brucella abortus biovar 1 (strain 9-941) OX=262698 GN=BruAb1_0435 PE=3 SV=1	BruAb1_0435	1.9275	0.000138697
	Q578Z9	Dcp, peptidyl-dipeptidase Dcp OS=Brucella abortus biovar 1 (strain 9-941) OX=262698 GN=dcp PE=3 SV=1	dcp	1.7447	1.82385e-05
	Q57DA1	Dihydropteroate synthase OS=Brucella abortus biovar 1 (strain 9-941) OX=262698 GN=folP PE=3 SV=1	folP	2.136	0.00133558
	Q57BW3	DUF1285 domain-containing protein(predicted) OS=Brucella abortus biovar 1 (strain 9-941) OX=262698 GN=BruAb1_1544 PE=4 SV=1	BruAb1_1544	4.2071	5.4902e-05
	Q579J1	RNA-binding region RNP-1(predicted) OS=Brucella abortus biovar 1 (strain 9-941) OX=262698 GN=BruAb2_0258 PE=4 SV=1	BruAb2_0258	1.6122	0.000795934
	Q577X6	Hypothetical FrnE OS=Brucella abortus biovar 1 (strain 9-941) OX=262698 GN=BruAb2_0647 PE=4 SV=1	BruAb2_0647	1.5668	0.000932607
	Q578D2	Transcriptional regulator PcaR, hypothetical OS=Brucella abortus biovar 1 (strain 9-941) OX=262698 GN=BruAb2_0587 PE=4 SV=1	BruAb2_0587	4.1166	3.4737e-05
	Q577N7	DUF488 domain-containing protein(predicted) OS=Brucella abortus biovar 1 (strain 9-941) OX=262698 GN=BruAb2_0745 PE=4 SV=1	BruAb2_0745	11.022	6.8772e-05
	Q57EV4	Enoyl-CoA hydratase/isomerase family protein OS=Brucella abortus biovar 1 (strain 9-941) OX=262698 GN=BruAb1_0434 PE=3 SV=1	BruAb1_0434	1.868	0.00106899
	Q57ET7	Histone deacetylase family protein OS=Brucella abortus biovar 1 (strain 9-941) OX=262698 GN=BruAb1_0452 PE=3 SV=1	BruAb1_0452	1.8912	0.00289547
	Q57A59	Transcriptional regulator, GntR family OS=Brucella abortus biovar 1 (strain 9-941) OX=262698 GN=BruAb2_0023 PE=4 SV=1	BruAb2_0023	1.7389	0.00347777
	Q579D0	NagA, N-acetylglucosamine-6-phosphate deacetylase OS=Brucella abortus biovar 1 (strain 9-941) OX=262698 GN=nagA PE=3 SV=1	nagA	1.9813	0.00712567
	Q579M1	Transcriptional regulator, MerR family OS=Brucella abortus biovar 1 (strain 9-941) OX=262698 GN=BruAb2_0222 PE=4 SV=1	BruAb2_0222	2.9569	0.000139816
	Q577H9	Transcriptional regulator, GntR family OS=Brucella abortus biovar 1 (strain 9-941) OX=262698 GN=BruAb2_0812 PE=4 SV=1	BruAb2_0812	1.6321	0.00294271
	Q57BM9	tRNA synthetase, class I OS=Brucella abortus biovar 1 (strain 9-941) OX=262698 GN=BruAb1_1635 PE=3 SV=1	BruAb1_1635	1.6543	0.0126923
	Q57C94	Antibiotic acetyltransferase OS=Brucella abortus biovar 1 (strain 9-941) OX=262698 GN=BruAb1_1410 PE=4 SV=1	BruAb1_1410	2.223	0.0433085
	Q57D23	NtrX, nitrogen regulation protein NtrX OS=Brucella abortus biovar 1 (strain 9-941) OX=262698 GN=ntrX PE=4 SV=1	ntrX	1.8114	0.000145287
	Q57BF6	Cell division protein ZapA(predicted) OS=Brucella abortus biovar 1 (strain 9-941) OX=262698 GN=BruAb1_1709 PE=4 SV=1	BruAb1_1709	2.1773	8.01558e-05
	Q57D27	GTPase HflX OS=Brucella abortus biovar 1 (strain 9-941) OX=262698 GN=hflX PE=3 SV=1	hflX	2.2688	7.61394e-05
	Q57DS3	Inositol monophosphatase family protein OS=Brucella abortus biovar 1 (strain 9-941) OX=262698 GN=BruAb1_0845 PE=4 SV=1	BruAb1_0845	1.922	0.00172554
	Q578K1	IolB protein OS=Brucella abortus biovar 1 (strain 9-941) OX=262698 GN=BruAb2_0514 PE=4 SV=1	BruAb2_0514	2.3504	5.41582e-05
	Q579U6	Transcriptional regulator, DeoR family OS=Brucella abortus biovar 1 (strain 9-941) OX=262698 GN=BruAb2_0142 PE=4 SV=1	BruAb2_0142	1.5425	0.0226813
	Q57B27	Chaperone protein ClpB OS=Brucella abortus biovar 1 (strain 9-941) OX=262698 GN=clpB PE=3 SV=1	clpB	3.3479	1.6108e-07
	Q57F61	Polyphosphate kinase OS=Brucella abortus biovar 1 (strain 9-941) OX=262698 GN=BruAb1_0323 PE=3 SV=1	BruAb1_0323	2.7567	9.73898e-05
	F8WJR1	Hypothetical transcriptional regulator OS=Brucella abortus biovar 1 (strain 9-941) OX=262698 GN=BruAb2_1035 PE=4 SV=1	BruAb2_1035	1.9376	0.00152846
	Q57AZ1	Acetyltransferase, GNAT family OS=Brucella abortus biovar 1 (strain 9-941) OX=262698 GN=BruAb1_1881 PE=4 SV=1	BruAb1_1881	2.2435	2.72973e-05
	Q578P1	Transcriptional regulator, MarR family OS=Brucella abortus biovar 1 (strain 9-941) OX=262698 GN=BruAb2_0471 PE=4 SV=1	BruAb2_0471	2.2598	1.92263e-05
	Q57AT1	6-carboxy-5,6,7,8-tetrahydropterin synthase OS=Brucella abortus biovar 1 (strain 9-941) OX=262698 GN=BruAb1_1949 PE=3 SV=1	BruAb1_1949	1.7072	0.00095815
	Q57A94	FabB, 3-oxoacyl-(Acyl-carrier-protein) synthase I OS=Brucella abortus biovar 1 (strain 9-941) OX=262698 GN=fabB PE=3 SV=1	fabB	1.5288	2.75803e-05
	Q579L3	Hypothetical extradiol ring-cleaving dioxygenase OS=Brucella abortus biovar 1 (strain 9-941) OX=262698 GN=BruAb2_0233 PE=4 SV=1	BruAb2_0233	2.9918	0.000469879
	Q57FX6	3-deoxy-manno-octulosonate cytidylyltransferase OS=Brucella abortus biovar 1 (strain 9-941) OX=262698 GN=kdsB PE=3 SV=1	kdsB	1.5733	8.79088e-06
	Q57EQ3	Guanylate kinase OS=Brucella abortus biovar 1 (strain 9-941) OX=262698 GN=gmk PE=3 SV=1	gmk	1.9938	5.19128e-05
	P0C144	Urease accessory protein UreE OS=Brucella abortus biovar 1 (strain 9-941) OX=262698 GN=ureE PE=3 SV=1	ureE	2.806	0.000361586
	Q57FM3	Integration host factor subunit beta OS=Brucella abortus biovar 1 (strain 9-941) OX=262698 GN=ihfB PE=3 SV=1	ihfB	1.617	0.00104649
	Q57DI4	Anhydro-N-acetylmuramic acid kinase OS=Brucella abortus biovar 1 (strain 9-941) OX=262698 GN=anmK PE=3 SV=1	anmK	1.5641	0.0015391
	Q579E8	Histidine ammonia-lyase OS=Brucella abortus biovar 1 (strain 9-941) OX=262698 GN=hutH PE=3 SV=1	hutH	6.0666	4.93089e-07
	P0C107	RNA-binding protein Hfq OS=Brucella abortus biovar 1 (strain 9-941) OX=262698 GN=hfq PE=3 SV=1	hfq	1.7541	0.00255676
	Q57AI9	Shikimate dehydrogenase (NADP(+)) OS=Brucella abortus biovar 1 (strain 9-941) OX=262698 GN=aroE PE=3 SV=1	aroE	1.5145	0.000639168
	P0CB35	60 kDa chaperonin OS=Brucella abortus biovar 1 (strain 9-941) OX=262698 GN=groL PE=3 SV=1	groL	3.2206	1.54246e-06
	Q57EQ8	Acyl carrier protein OS=Brucella abortus biovar 1 (strain 9-941) OX=262698 GN=acpP PE=3 SV=1	acpP	1.9065	1.90578e-07
	Q576R4	4-hydroxy-tetrahydrodipicolinate reductase OS=Brucella abortus biovar 1 (strain 9-941) OX=262698 GN=dapB PE=3 SV=1	dapB	1.8307	0.00021297
	Q57E83	Holo-[acyl-carrier-protein] synthase OS=Brucella abortus biovar 1 (strain 9-941) OX=262698 GN=acpS PE=3 SV=1	acpS	2.3099	0.000460804
	Q579Q7	ATP phosphoribosyltransferase regulatory subunit OS=Brucella abortus biovar 1 (strain 9-941) OX=262698 GN=hisZ PE=3 SV=1	hisZ	1.6657	0.000830301
	Q57D11	Pyruvate dehydrogenase E1 component subunit beta OS=Brucella abortus biovar 1 (strain 9-941) OX=262698 GN=pdhB PE=4 SV=1	pdhB	2.4595	8.53193e-06
	Q579E7	Imidazolonepropionase OS=Brucella abortus biovar 1 (strain 9-941) OX=262698 GN=hutI PE=3 SV=1	hutI	7.2238	3.73913e-05
	Q2YN92	Riboflavin synthase OS=Brucella abortus (strain 2308) OX=359391 GN=ribE PE=1 SV=1	ribE	2.5008	2.2611e-05
	Q2YPS1	Esterase/lipase/thioesterase, active site OS=Brucella abortus (strain 2308) OX=359391 GN=BAB1_0058 PE=4 SV=1	BAB1_0058	1.8359	0.00105335
	Q2YRS5	Glutathione S-transferase, C-terminal OS=Brucella abortus (strain 2308) OX=359391 GN=BAB1_1578 PE=4 SV=1	BAB1_1578	4.5918	2.30767e-05
	Q2YR63	Response regulator receiver:Transcriptional regulatory protein, C terminal OS=Brucella abortus (strain 2308) OX=359391 GN=BAB1_2006 PE=4 SV=1	BAB1_2006	1.8508	1.08391e-05
	Q2YNJ3	HpcH/HpaI aldolase OS=Brucella abortus (strain 2308) OX=359391 GN=BAB1_0864 PE=3 SV=1	BAB1_0864	4.4562	5.23229e-07
	Q2YMY4	Conserved domain protein OS=Brucella abortus (strain 2308) OX=359391 GN=BAB1_0663 PE=4 SV=1	BAB1_0663	2.0538	0.000172283
	Q2YN54	Short-chain dehydrogenase/reductase SDR:Glucose/ribitol dehydrogenase OS=Brucella abortus (strain 2308) OX=359391 GN=BAB1_0736 PE=4 SV=1	BAB1_0736	2.8147	0.000400225
	Q2YQ25	Universal stress protein (Usp) OS=Brucella abortus (strain 2308) OX=359391 GN=BAB1_1068 PE=3 SV=1	BAB1_1068	3.9551	9.78761e-06
	Q2YLG3	Eukaryotic thiol (Cysteine) protease:Short-chain dehydrogenase/reductase SDR:Glucose/ribitol dehydrogenase OS=Brucella abortus (strain 2308) OX=359391 GN=BAB1_1789 PE=4 SV=1	BAB1_1789	1.8291	0.00772524
	Q2YQT2	Ferritin:DNA-binding protein Dps OS=Brucella abortus (strain 2308) OX=359391 GN=BAB1_2150 PE=3 SV=1	BAB1_2150	2.5165	9.26292e-06
	Q2YIG6	Bacterial regulatory proteins, AsnC family:Binding-protein-dependent transport systems inner membrane component:Bacterial reg OS=Brucella abortus (strain 2308) OX=359391 GN=BAB2_0336 PE=4 SV=1	BAB2_0336	2.3771	4.40503e-05
	Q57AH2	Phosphoribosyl-ATP pyrophosphatase OS=Brucella abortus biovar 1 (strain 9-941) OX=262698 GN=hisE PE=3 SV=1	hisE	1.5392	8.62499e-06
	Q57DY0	Transcription antitermination protein NusB OS=Brucella abortus biovar 1 (strain 9-941) OX=262698 GN=nusB PE=3 SV=1	nusB	1.8482	0.000566915
	P0A2Y1	Arginase OS=Brucella abortus biovar 1 (strain 9-941) OX=262698 GN=arcB PE=3 SV=1	arcB	2.2109	0.000285067
	Q57DY1	6,7-dimethyl-8-ribityllumazine synthase 1 OS=Brucella abortus biovar 1 (strain 9-941) OX=262698 GN=ribH1 PE=3 SV=1	ribH1	1.6093	0.00174504
	P0C1D5	Urease subunit beta 1 OS=Brucella abortus biovar 1 (strain 9-941) OX=262698 GN=ureB1 PE=3 SV=1	ureB1	1.5847	0.00544718
	Q57AP0	Transcriptional regulator, MerR family OS=Brucella abortus biovar 1 (strain 9-941) OX=262698 GN=BruAb1_1992 PE=4 SV=1	BruAb1_1992	2.1298	0.000435471
	Q57FG6	Thiamine-phosphate synthase OS=Brucella abortus biovar 1 (strain 9-941) OX=262698 GN=BruAb1_0209 PE=3 SV=1	BruAb1_0209	3.611	7.41973e-06
	Q57FY4	Transcriptional regulator, LysR family OS=Brucella abortus biovar 1 (strain 9-941) OX=262698 GN=BruAb1_0029 PE=3 SV=1	BruAb1_0029	2.0444	0.000157924
	Q578Q7	Glucose-6-phosphate 1-dehydrogenase OS=Brucella abortus biovar 1 (strain 9-941) OX=262698 GN=zwf PE=3 SV=1	zwf	1.7802	3.78005e-05
	Q579F8	D-galactose 1-dehydrogenase, hypothetical OS=Brucella abortus biovar 1 (strain 9-941) OX=262698 GN=BruAb2_0292 PE=4 SV=1	BruAb2_0292	2.6503	2.17489e-05
	Q57AD1	Glutathione synthetase OS=Brucella abortus biovar 1 (strain 9-941) OX=262698 GN=gshB PE=3 SV=1	gshB	1.8326	0.000128899
	Q57B58	MmsA, methylmalonic acid semialdehyde dehydrogenase OS=Brucella abortus biovar 1 (strain 9-941) OX=262698 GN=mmsA PE=4 SV=1	mmsA	1.6295	0.00205662
	Q57DQ6	Ribulose-phosphate 3-epimerase OS=Brucella abortus biovar 1 (strain 9-941) OX=262698 GN=rpe PE=3 SV=1	rpe	2.0865	0.000974652
	Q576Y5	Ribitol dehydrogenase OS=Brucella abortus biovar 1 (strain 9-941) OX=262698 GN=BruAb2_0912 PE=3 SV=1	BruAb2_0912	1.6362	0.00361075
	Q57BF7	5-formyltetrahydrofolate cyclo-ligase OS=Brucella abortus biovar 1 (strain 9-941) OX=262698 GN=BruAb1_1708 PE=3 SV=1	BruAb1_1708	1.9479	0.00133891
	Q57CD4	Pyridoxamine 5'-phosphate oxidase-related FMN-binding(predicted) OS=Brucella abortus biovar 1 (strain 9-941) OX=262698 GN=BruAb1_1369 PE=4 SV=1	BruAb1_1369	1.6052	0.00106442
	Q576G2	Transcriptional regulator, MarR family OS=Brucella abortus biovar 1 (strain 9-941) OX=262698 GN=BruAb2_1099 PE=4 SV=1	BruAb2_1099	3.3377	1.24343e-05
	Q57DB7	Glutathione reductase OS=Brucella abortus biovar 1 (strain 9-941) OX=262698 GN=gor PE=3 SV=1	gor	1.716	0.000443589
	Q576J8	Ferric uptake regulation protein OS=Brucella abortus biovar 1 (strain 9-941) OX=262698 GN=BruAb2_1062 PE=3 SV=1	BruAb2_1062	1.56	0.0028528
	Q59175	Ornithine cyclodeaminase OS=Brucella abortus biovar 1 (strain 9-941) OX=262698 GN=ocd PE=3 SV=1	ocd	2.1956	3.56128e-05
	Q57CU5	tRNA (cytidine/uridine-2'-O-)-methyltransferase TrmJ OS=Brucella abortus biovar 1 (strain 9-941) OX=262698 GN=trmJ PE=3 SV=1	trmJ	2.0881	0.000191064
	Q577X7	Fosfomycin resistance family protein OS=Brucella abortus biovar 1 (strain 9-941) OX=262698 GN=BruAb2_0646 PE=4 SV=1	BruAb2_0646	3.6543	7.17783e-05
	Q57BB5	Ferredoxin OS=Brucella abortus biovar 1 (strain 9-941) OX=262698 GN=fdxA PE=4 SV=1	fdxA	2.1736	0.000300178
	Q57CV5	DUF924 family protein(predicted) OS=Brucella abortus biovar 1 (strain 9-941) OX=262698 GN=BruAb1_1191 PE=4 SV=1	BruAb1_1191	1.6418	0.0465314
	Q57DA0	7,8-dihydroneopterin aldolase OS=Brucella abortus biovar 1 (strain 9-941) OX=262698 GN=folB PE=3 SV=1	folB	1.9465	0.00315242
	Q578S0	Peptidase, S24 family OS=Brucella abortus biovar 1 (strain 9-941) OX=262698 GN=BruAb2_0440 PE=4 SV=1	BruAb2_0440	2.3853	0.00228599
	Q57B82	Probable transaldolase OS=Brucella abortus biovar 1 (strain 9-941) OX=262698 GN=tal PE=3 SV=1	tal	1.8889	7.2452e-06
	F8WJU0	Bacterioferritin OS=Brucella abortus biovar 1 (strain 9-941) OX=262698 GN=bfr PE=3 SV=1	bfr	2.0184	0.000205268
	Q579D1	NagB, glucosamine-fructose-6-phosphate aminotransferase OS=Brucella abortus biovar 1 (strain 9-941) OX=262698 GN=nagB PE=4 SV=1	nagB	3.2137	4.56543e-05
	Q579A0	Glyoxalase family protein OS=Brucella abortus biovar 1 (strain 9-941) OX=262698 GN=BruAb2_0353 PE=4 SV=1	BruAb2_0353	2.0101	0.000203701
	Q57AL8	Glucose 1-dehydrogenase, hypothetical OS=Brucella abortus biovar 1 (strain 9-941) OX=262698 GN=BruAb1_2014 PE=4 SV=1	BruAb1_2014	1.8491	0.00581251
	Q57BM2	Sensor histidine kinase, hypothetical OS=Brucella abortus biovar 1 (strain 9-941) OX=262698 GN=BruAb1_1642 PE=4 SV=1	BruAb1_1642	2.2422	0.00231763
CytoplasmicMembrane	Q2YQT4	Lipoprotein, putative OS=Brucella abortus (strain 2308) OX=359391 GN=BAB1_2148 PE=4 SV=1	BAB1_2148	3.0837	0.000140951
	Q2YKA1	Histidine kinase OS=Brucella abortus (strain 2308) OX=359391 GN=BAB2_0763 PE=4 SV=1	BAB2_0763	1.5379	0.00127608
	Q2YNU7	ATP/GTP-binding site motif A (P-loop):ABC transporter:AAA ATPase:Sugar transporter superfamily OS=Brucella abortus (strain 2308) OX=359391 GN=BAB1_0082 PE=3 SV=1	BAB1_0082	2.8304	0.000590904
	Q2YR88	Sodium:dicarboxylate symporter:Thioredoxin type domain:Thioredoxin domain 2 OS=Brucella abortus (strain 2308) OX=359391 GN=BAB1_1981 PE=4 SV=1	BAB1_1981	1.8993	0.000162015
	Q2YPS5	Iron-sulfur cluster carrier protein OS=Brucella abortus (strain 2308) OX=359391 GN=BAB1_0054 PE=3 SV=1	BAB1_0054	1.6753	0.000163171
	Q2YP76	Substrate-binding region of ABC-type glycine betaine transport system OS=Brucella abortus (strain 2308) OX=359391 GN=BAB1_0226 PE=1 SV=1	BAB1_0226	2.5363	0.000649744
	Q2YRC0	OmpA/MotB domain OS=Brucella abortus (strain 2308) OX=359391 GN=BAB1_1726 PE=4 SV=1	BAB1_1726	2.2	3.67568e-05
	Q2YRQ0	Zinc metalloprotease OS=Brucella abortus (strain 2308) OX=359391 GN=BAB1_1178 PE=3 SV=1	BAB1_1178	2.4473	0.00470688
	Q2YR72	Cell division ATP-binding protein FtsE OS=Brucella abortus (strain 2308) OX=359391 GN=ftsE PE=3 SV=1	ftsE	1.7744	0.000855003
	Q2YS25	Protein HflC OS=Brucella abortus (strain 2308) OX=359391 GN=hflC PE=3 SV=1	hflC	1.9405	1.86716e-05
	Q2YKI9	Rhodopsin-like GPCR superfamily:ATP/GTP-binding site motif A (P-loop):ABC transporter:AAA ATPase OS=Brucella abortus (strain 2308) OX=359391 GN=BAB2_0670 PE=3 SV=1	BAB2_0670	13.907	1.00109e-06
	Q2YMM6	Uncharacterized protein OS=Brucella abortus (strain 2308) OX=359391 GN=BAB1_0528 PE=4 SV=1	BAB1_0528	2.3664	0.000192452
	Q2YQP2	Putative fluoride ion transporter CrcB OS=Brucella abortus (strain 2308) OX=359391 GN=crcB PE=3 SV=1	crcB	4.187	0.000151705
	Q2YRB2	AsmA OS=Brucella abortus (strain 2308) OX=359391 GN=BAB1_1623 PE=4 SV=1	BAB1_1623	1.9151	0.000574219
	Q2YNU0	Cytochrome c biogenesis ATP-binding export protein CcmA OS=Brucella abortus (strain 2308) OX=359391 GN=ccmA PE=3 SV=1	ccmA	1.5499	6.19265e-05
	Q2YQ66	Nitrogen regulatory protein P-II OS=Brucella abortus (strain 2308) OX=359391 GN=glnB PE=3 SV=1	glnB	1.5705	0.00109241
	Q2YP04	Uncharacterized protein OS=Brucella abortus (strain 2308) OX=359391 GN=BAB1_0166 PE=4 SV=1	BAB1_0166	10.3212	0.00705414
	Q2YNM9	Sec-independent protein translocase protein TatA OS=Brucella abortus (strain 2308) OX=359391 GN=tatA PE=3 SV=1	tatA	2.085	0.00024425
	Q2YMX4	Histidine kinase OS=Brucella abortus (strain 2308) OX=359391 GN=BAB1_0637 PE=4 SV=1	BAB1_0637	2.449	7.10968e-05
	Q2YP95	ATP/GTP-binding site motif A (P-loop):ABC transporter:AAA ATPase OS=Brucella abortus (strain 2308) OX=359391 GN=BAB1_0241 PE=3 SV=1	BAB1_0241	2.0179	0.00101653
	Q2YM24	Na+/Pi-cotransporter OS=Brucella abortus (strain 2308) OX=359391 GN=BAB1_1500 PE=4 SV=1	BAB1_1500	1.5337	0.000688495
	Q2YJH4	Zinc import ATP-binding protein ZnuC OS=Brucella abortus (strain 2308) OX=359391 GN=znuC PE=3 SV=1	znuC	2.1507	3.18337e-05
	Q2YMI0	Phosphatidylserine decarboxylase proenzyme OS=Brucella abortus (strain 2308) OX=359391 GN=psd PE=3 SV=1	psd	1.6237	0.000274347
	Q2YPJ2	Large-conductance mechanosensitive channel OS=Brucella abortus (strain 2308) OX=359391 GN=mscL PE=3 SV=1	mscL	2.9855	7.83591e-05
	Q2YMB3	Na(+)/H(+) antiporter NhaA OS=Brucella abortus (strain 2308) OX=359391 GN=nhaA PE=3 SV=2	nhaA	1.8123	0.000686527
	Q2YNM1	Sec translocon accessory complex subunit YajC OS=Brucella abortus (strain 2308) OX=359391 GN=yajC PE=3 SV=1	yajC	2.1801	0.00166915
	Q2YIN5	Molybdenum import ATP-binding protein ModC OS=Brucella abortus (strain 2308) OX=359391 GN=modC PE=3 SV=1	modC	1.5754	0.00647781
	Q2YNA3	RDD domain-containing protein OS=Brucella abortus (strain 2308) OX=359391 GN=BAB1_0779 PE=4 SV=1	BAB1_0779	1.8477	0.00456296
	Q2YRU4	Transcriptional regulatory protein OS=Brucella abortus (strain 2308) OX=359391 GN=BAB1_1227 PE=3 SV=1	BAB1_1227	2.372	0.00864131
	Q2YJ61	Sensor protein QseC OS=Brucella abortus (strain 2308) OX=359391 GN=BAB2_0221 PE=4 SV=1	BAB2_0221	1.5045	0.00565679
	Q2YIM4	NAD(P) transhydrogenase subunit beta OS=Brucella abortus (strain 2308) OX=359391 GN=pntB PE=3 SV=1	pntB	1.6362	0.000631951
	Q2YQQ6	Glutelin:Lipoprotein YaeC family:NLPA lipoprotein OS=Brucella abortus (strain 2308) OX=359391 GN=BAB1_2176 PE=3 SV=1	BAB1_2176	1.5617	0.000145704
	Q57BR6	Cell-division control histidine kinase PdhS OS=Brucella abortus biovar 1 (strain 9-941) OX=262698 GN=pdhS PE=1 SV=1	pdhS	1.9938	0.000301228
	Q57EC4	Histidine kinase OS=Brucella abortus biovar 1 (strain 9-941) OX=262698 GN=BruAb1_0635 PE=4 SV=1	BruAb1_0635	1.5838	0.00418104
	Q57E82	Signal peptidase I OS=Brucella abortus biovar 1 (strain 9-941) OX=262698 GN=BruAb1_0677 PE=3 SV=1	BruAb1_0677	2.137	2.24563e-05
	Q57CU9	Hypothetical membrane protein OS=Brucella abortus biovar 1 (strain 9-941) OX=262698 GN=BruAb1_1197 PE=4 SV=1	BruAb1_1197	1.5098	0.00439829
	Q57B60	Pyridoxal kinase OS=Brucella abortus biovar 1 (strain 9-941) OX=262698 GN=BruAb1_1809 PE=4 SV=1	BruAb1_1809	1.8939	4.43341e-05
	Q57BC6	17 kDa surface antigen OS=Brucella abortus biovar 1 (strain 9-941) OX=262698 GN=BruAb1_1740 PE=3 SV=1	BruAb1_1740	3.227	0.00514682
	Q57AA7	Apolipoprotein N-acyltransferase OS=Brucella abortus biovar 1 (strain 9-941) OX=262698 GN=cutE PE=3 SV=1	cutE	1.8666	0.00262412
	Q57BG7	MotA_ExbB domain-containing protein OS=Brucella abortus biovar 1 (strain 9-941) OX=262698 GN=BruAb1_1698 PE=3 SV=1	BruAb1_1698	2.2642	9.72059e-05
	Q579X9	Glycosyl transferase, group 2 family protein OS=Brucella abortus biovar 1 (strain 9-941) OX=262698 GN=BruAb2_0105 PE=4 SV=1	BruAb2_0105	1.9484	0.00134263
	Q57FN3	Usp domain-containing protein OS=Brucella abortus biovar 1 (strain 9-941) OX=262698 GN=BruAb1_0138 PE=4 SV=1	BruAb1_0138	2.4253	0.000109049
	Q57DB0	Hypothetical toulene ABC transporter, permease protein OS=Brucella abortus biovar 1 (strain 9-941) OX=262698 GN=BruAb1_1024 PE=4 SV=1	BruAb1_1024	1.939	0.0154487
	Q579H7	Lipoprotein OS=Brucella abortus biovar 1 (strain 9-941) OX=262698 GN=BruAb2_0273 PE=3 SV=1	BruAb2_0273	1.6993	0.00418569
	Q578U7	TIGR02186 family protein(predicted) OS=Brucella abortus biovar 1 (strain 9-941) OX=262698 GN=BruAb2_0408 PE=4 SV=1	BruAb2_0408	2.7798	0.000673607
	Q57CG0	Iron compound ABC transporter, ATP-binding protein OS=Brucella abortus biovar 1 (strain 9-941) OX=262698 GN=BruAb1_1342 PE=3 SV=1	BruAb1_1342	1.7232	0.0136425
	Q57DN3	Tellurite resistance TerB family protein(predicted) OS=Brucella abortus biovar 1 (strain 9-941) OX=262698 GN=BruAb1_0886 PE=4 SV=1	BruAb1_0886	2.1741	6.77347e-05
	Q57CT7	OmpA family protein OS=Brucella abortus biovar 1 (strain 9-941) OX=262698 GN=BruAb1_1209 PE=4 SV=1	BruAb1_1209	2.0068	8.15843e-05
	Q2YNL0	Eukaryotic/viral aspartic protease, active site OS=Brucella abortus (strain 2308) OX=359391 GN=BAB1_0883 PE=4 SV=1	BAB1_0883	2.3522	0.00222842
	Q2YPJ4	Histidine kinase OS=Brucella abortus (strain 2308) OX=359391 GN=BAB1_0346 PE=3 SV=1	BAB1_0346	2.3518	0.00487081
	Q2YQI0	Bile acid:sodium symporter OS=Brucella abortus (strain 2308) OX=359391 GN=BAB1_1700 PE=4 SV=1	BAB1_1700	2.2331	0.00769241
	Q2YIR3	Magnesium transporter MgtE OS=Brucella abortus (strain 2308) OX=359391 GN=mgtE PE=3 SV=1	mgtE	1.8662	0.000746967
	Q577N8	Pyridine nucleotide-disulphide oxidoreductase family protein OS=Brucella abortus biovar 1 (strain 9-941) OX=262698 GN=BruAb2_0744 PE=4 SV=1	BruAb2_0744	1.6043	0.00786168
	Q2YMR9	ATP/GTP-binding site motif A (P-loop) OS=Brucella abortus (strain 2308) OX=359391 GN=BAB1_0588 PE=4 SV=1	BAB1_0588	2.0077	0.000119446
	Q2YP17	Clp protease:Peptidase U7:Signal peptide peptidase, SppA 36 kDa type OS=Brucella abortus (strain 2308) OX=359391 GN=sppA PE=3 SV=1	sppA	1.9563	0.000345929
	Q57C78	UDP-N-acetylglucosamine--N-acetylmuramyl-(pentapeptide) pyrophosphoryl-undecaprenol N-acetylglucosamine transferase OS=Brucella abortus biovar 1 (strain 9-941) OX=262698 GN=murG PE=3 SV=1	murG	2.0901	0.00208137
	Q576E0	Putative ATP-binding protein BruAb2_1123 OS=Brucella abortus biovar 1 (strain 9-941) OX=262698 GN=BruAb2_1123 PE=3 SV=1	BruAb2_1123	3.7335	0.016306
	Q57A37	Hypothetical lysophospholipase L2 OS=Brucella abortus biovar 1 (strain 9-941) OX=262698 GN=BruAb2_0046 PE=4 SV=1	BruAb2_0046	1.6998	0.0109688
	Q57FR1	Sulfate/thiosulfate import ATP-binding protein CysA OS=Brucella abortus biovar 1 (strain 9-941) OX=262698 GN=cysA PE=3 SV=1	cysA	2.2418	0.0011211
	Q57AC5	Phosphate ABC transporter, phosphate-binding protein OS=Brucella abortus biovar 1 (strain 9-941) OX=262698 GN=BruAb1_2113 PE=4 SV=1	BruAb1_2113	1.6953	7.07918e-06
	Q2YNC4	K(+)-insensitive pyrophosphate-energized proton pump OS=Brucella abortus (strain 2308) OX=359391 GN=hppA PE=3 SV=1	hppA	1.7361	0.00148998
OuterMembrane	Q2YNY3	Outer membrane protein, putative OS=Brucella abortus (strain 2308) OX=359391 GN=BAB1_0116 PE=4 SV=1	BAB1_0116	2.7622	8.2886e-05
	Q2YN48	LPS-assembly protein LptD OS=Brucella abortus (strain 2308) OX=359391 GN=lptD PE=3 SV=1	lptD	1.8596	2.74228e-05
	Q2YIK8	Heme transporter BhuA OS=Brucella abortus (strain 2308) OX=359391 GN=BAB2_0233 PE=3 SV=1	BAB2_0233	1.5482	0.000407015
	Q2YJB2	Heme transporter BhuA OS=Brucella abortus (strain 2308) OX=359391 GN=bhuA PE=1 SV=1	bhuA	1.7124	0.0159046
	Q2YQH3	Peptidoglycan-associated protein OS=Brucella abortus (strain 2308) OX=359391 GN=pal PE=3 SV=1	pal	2.303	0.00066211
	Q2YME6	MliC domain-containing protein OS=Brucella abortus (strain 2308) OX=359391 GN=BAB1_0466 PE=4 SV=1	BAB1_0466	3.4318	1.47615e-05
	Q2YLR6	Outer membrane lipoprotein omp19 OS=Brucella abortus (strain 2308) OX=359391 GN=omp19 PE=3 SV=1	omp19	3.239	9.76e-05
	Q2YNR8	Membrane protein involved in aromatic hydrocarbon degradation OS=Brucella abortus (strain 2308) OX=359391 GN=BAB1_0967 PE=3 SV=1	BAB1_0967	1.9289	0.000614681
	Q2YIT2	Uncharacterized protein OS=Brucella abortus (strain 2308) OX=359391 GN=BAB2_0071 PE=4 SV=1	BAB2_0071	3.2941	0.00174623
	Q2YIP8	Lipoprotein Omp10 OS=Brucella abortus (strain 2308) OX=359391 GN=omp10 PE=4 SV=1	omp10	3.3105	0.000795585
	Q57FW8	Bacterial surface antigen (D15)(predicted) OS=Brucella abortus biovar 1 (strain 9-941) OX=262698 GN=BruAb1_0048 PE=4 SV=1	BruAb1_0048	2.2213	1.55257e-05
	Q44664	25 kDa outer-membrane immunogenic protein OS=Brucella abortus biovar 1 (strain 9-941) OX=262698 GN=omp25 PE=3 SV=2	omp25	2.3528	3.71237e-05
	Q44620	Porin Omp2a OS=Brucella abortus biovar 1 (strain 9-941) OX=262698 GN=omp2a PE=1 SV=2	omp2a	1.673	0.000148912
	Q57C87	Outer membrane protein assembly factor BamD OS=Brucella abortus biovar 1 (strain 9-941) OX=262698 GN=comL PE=3 SV=1	comL	2.0921	7.08184e-05
	F8WJS4	Hypothetical membrane protein OS=Brucella abortus biovar 1 (strain 9-941) OX=262698 GN=BruAb1_1285 PE=4 SV=1	BruAb1_1285	1.6525	0.000603798
	Q57CF7	Heme transporter BhuA OS=Brucella abortus biovar 1 (strain 9-941) OX=262698 GN=BruAb1_1345 PE=3 SV=1	BruAb1_1345	2.0769	1.80024e-05
	Q57CY5	Outer membrane protein assembly factor BamA OS=Brucella abortus biovar 1 (strain 9-941) OX=262698 GN=bamA PE=3 SV=1	bamA	1.7176	1.08534e-06
	Q2YNS2	Outer membrane efflux protein OS=Brucella abortus (strain 2308) OX=359391 GN=BAB1_0963 PE=3 SV=1	BAB1_0963	1.6275	4.68338e-07
Periplasmic	Q2YIN7	Molybdenum ABC transporter, periplasmic binding protein OS=Brucella abortus (strain 2308) OX=359391 GN=modA PE=3 SV=1	modA	1.5075	0.000108806
	Q2YKT4	Periplasmic binding protein OS=Brucella abortus (strain 2308) OX=359391 GN=BAB2_0564 PE=4 SV=1	BAB2_0564	1.5333	8.77986e-05
	Q2YNW1	Prokaryotic sulfate-/thiosulfate-binding protein:Bacterial extracellular solute-binding protein, family 1 OS=Brucella abortus (strain 2308) OX=359391 GN=BAB1_0104 PE=4 SV=1	BAB1_0104	4.2869	0.000225822
	Q2YIY2	Periplasmic binding protein/LacI transcriptional regulator OS=Brucella abortus (strain 2308) OX=359391 GN=rbsB-2 PE=4 SV=1	rbsB-2	2.2418	3.54945e-05
	Q2YKP4	Solute-binding protein/glutamate receptor:Ionotropic glutamate receptor:Bacterial extracellular solute-binding protein, family 3 OS=Brucella abortus (strain 2308) OX=359391 GN=BAB2_0612 PE=3 SV=1	BAB2_0612	3.1329	0.000336816
	Q2YKU9	Bacterial extracellular solute-binding protein, family 1 OS=Brucella abortus (strain 2308) OX=359391 GN=BAB2_0547 PE=3 SV=1	BAB2_0547	1.8521	3.31442e-05
	Q2YKG1	Bacterial extracellular solute-binding protein, family 5 OS=Brucella abortus (strain 2308) OX=359391 GN=BAB2_0699 PE=3 SV=1	BAB2_0699	1.9216	2.83782e-05
	Q2YPL6	Bacterial extracellular solute-binding protein, family 5 OS=Brucella abortus (strain 2308) OX=359391 GN=BAB1_0010 PE=3 SV=1	BAB1_0010	1.832	3.45114e-05
	Q2YKZ9	Putative binding protein BAB2_0491 OS=Brucella abortus (strain 2308) OX=359391 GN=BAB2_0491 PE=3 SV=1	BAB2_0491	10.4493	4.40939e-07
	Q2YMR6	Superoxide dismutase OS=Brucella abortus (strain 2308) OX=359391 GN=BAB1_0591 PE=3 SV=1	BAB1_0591	3.3186	0.000121669
	Q2YJS2	Bacterial extracellular solute-binding protein, family 5 OS=Brucella abortus (strain 2308) OX=359391 GN=BAB2_0974 PE=3 SV=1	BAB2_0974	2.8112	0.000107141
	Q2YMD1	Pyridoxine/pyridoxamine 5'-phosphate oxidase OS=Brucella abortus (strain 2308) OX=359391 GN=pdxH PE=3 SV=1	pdxH	1.7618	0.00233719
	Q2YLW8	Thiamine-binding periplasmic protein OS=Brucella abortus (strain 2308) OX=359391 GN=thiB PE=3 SV=1	thiB	3.1846	3.68902e-06
	Q2YNH7	Solute-binding protein/glutamate receptor:Ionotropic glutamate receptor:Bacterial extracellular solute-binding protein, family 3 OS=Brucella abortus (strain 2308) OX=359391 GN=BAB1_0881 PE=3 SV=1	BAB1_0881	2.0082	0.00011018
	Q2YMX6	Probable periplasmic serine endoprotease DegP-like OS=Brucella abortus (strain 2308) OX=359391 GN=htrA PE=3 SV=1	htrA	2.0589	1.14325e-05
	Q2YK69	N-acetylneuraminate epimerase OS=Brucella abortus (strain 2308) OX=359391 GN=nanM PE=3 SV=1	nanM	1.5581	0.018555
	Q2YS27	Periplasmic serine endoprotease DegP-like OS=Brucella abortus (strain 2308) OX=359391 GN=BAB1_1413 PE=3 SV=1	BAB1_1413	1.6074	0.000371896
	Q2YPE4	Solute-binding protein/glutamate receptor:Bacterial extracellular solute-binding protein, family 3 OS=Brucella abortus (strain 2308) OX=359391 GN=BAB1_0325 PE=4 SV=1	BAB1_0325	3.5302	0.000847856
	Q2YK66	Putative ABC transporter peptide-binding protein BAB2_0812 OS=Brucella abortus (strain 2308) OX=359391 GN=BAB2_0812 PE=3 SV=1	BAB2_0812	2.2313	0.000564361
	Q2YS14	Immunoreactive 28 kDa outer membrane protein OS=Brucella abortus (strain 2308) OX=359391 GN=omp28 PE=4 SV=1	omp28	3.0466	8.35267e-05
	Q2YNV2	Uncharacterized protein OS=Brucella abortus (strain 2308) OX=359391 GN=BAB1_0075 PE=4 SV=1	BAB1_0075	1.9909	0.000131844
	P15453	Superoxide dismutase [Cu-Zn] OS=Brucella abortus biovar 1 (strain 9-941) OX=262698 GN=sodC PE=1 SV=2	sodC	2.615	0.000313572
	Q577B9	Sugar ABC transporter, periplasmic sugar-binding protein OS=Brucella abortus biovar 1 (strain 9-941) OX=262698 GN=BruAb2_0877 PE=3 SV=1	BruAb2_0877	4.2828	7.33475e-05
	Q577D8	Hypothetical spermidine/putrescine ABC transporter, periplasmic spermidine/putrescine-binding protein OS=Brucella abortus biovar 1 (strain 9-941) OX=262698 GN=BruAb2_0855 PE=3 SV=1	BruAb2_0855	4.0971	2.04835e-05
	Q57CH1	Hypothetical sulfate ABC transporter, sulfate-binding protein OS=Brucella abortus biovar 1 (strain 9-941) OX=262698 GN=BruAb1_1330 PE=4 SV=1	BruAb1_1330	2.5539	1.18281e-06
	Q577U2	Oligopeptide ABC transporter, periplasmic oligopeptide-binding protein OS=Brucella abortus biovar 1 (strain 9-941) OX=262698 GN=BruAb2_0685 PE=3 SV=1	BruAb2_0685	2.1624	0.000141448
	Q576H4	XylF, D-xylose ABC transporter, periplasmic D-xylose-binding protein OS=Brucella abortus biovar 1 (strain 9-941) OX=262698 GN=xylF PE=4 SV=1	xylF	4.1386	0.00329749
	Q578E6	sn-glycerol-3-phosphate-binding periplasmic protein UgpB OS=Brucella abortus biovar 1 (strain 9-941) OX=262698 GN=ugpB PE=3 SV=1	ugpB	2.8935	9.79679e-05
	Q577X5	Putative binding protein BruAb2_0648 OS=Brucella abortus biovar 1 (strain 9-941) OX=262698 GN=BruAb2_0648 PE=3 SV=1	BruAb2_0648	1.6943	0.000449392
	Q57A58	Leu/Ile/Val-binding protein homolog 4 OS=Brucella abortus biovar 1 (strain 9-941) OX=262698 GN=BruAb2_0024 PE=3 SV=2	BruAb2_0024	2.6772	0.000439355
	Q57BI3	Tol-Pal system protein TolB OS=Brucella abortus biovar 1 (strain 9-941) OX=262698 GN=tolB PE=3 SV=1	tolB	1.8364	3.68794e-06
	Q57B99	Leu/Ile/Val-binding protein homolog 1 OS=Brucella abortus biovar 1 (strain 9-941) OX=262698 GN=BruAb1_1767 PE=3 SV=1	BruAb1_1767	2.3362	8.66996e-05
	Q578E0	Leu/Ile/Val-binding protein homolog 6 OS=Brucella abortus biovar 1 (strain 9-941) OX=262698 GN=BruAb2_0578 PE=3 SV=1	BruAb2_0578	2.2439	0.00100999
	Q57FS3	CycY, thiol:disulfide interchange protein, thioredoxin family OS=Brucella abortus biovar 1 (strain 9-941) OX=262698 GN=cycY PE=3 SV=1	cycY	2.5419	3.06092e-05
Unknown	Q2YLN2	Glutaredoxin OS=Brucella abortus (strain 2308) OX=359391 GN=grxC PE=3 SV=1	grxC	2.2625	4.52295e-05
	P0A3T3	31 kDa immunogenic protein OS=Brucella abortus biovar 1 (strain 9-941) OX=262698 GN=bcsP31 PE=4 SV=1	bcsP31	2.9104	7.61951e-05
	Q57EH9	HTH-type transcriptional regulator BetI OS=Brucella abortus biovar 1 (strain 9-941) OX=262698 GN=betI PE=3 SV=1	betI	2.8661	0.000697774
	Q2YQ65	Bifunctional NAD(P)H-hydrate repair enzyme OS=Brucella abortus (strain 2308) OX=359391 GN=nnrD PE=3 SV=1	nnrD	1.9344	0.000124628
	Q2YLJ0	Ribosomal RNA large subunit methyltransferase H OS=Brucella abortus (strain 2308) OX=359391 GN=rlmH PE=3 SV=1	rlmH	5.3941	6.06204e-06
	Q2YM99	TPR_21 domain-containing protein OS=Brucella abortus (strain 2308) OX=359391 GN=BAB1_0404 PE=4 SV=1	BAB1_0404	1.6122	0.000352827
	Q2YQY2	ATP/GTP-binding site motif A (P-loop) OS=Brucella abortus (strain 2308) OX=359391 GN=BAB1_2094 PE=4 SV=1	BAB1_2094	2.0938	0.00690617
	Q2YRN4	Extensin-like_C domain-containing protein OS=Brucella abortus (strain 2308) OX=359391 GN=BAB1_1527 PE=4 SV=1	BAB1_1527	3.8009	0.000176335
	Q2YLK8	LemA family OS=Brucella abortus (strain 2308) OX=359391 GN=BAB1_1830 PE=3 SV=1	BAB1_1830	3.3069	4.87644e-06
	Q2YQG2	Uncharacterized protein OS=Brucella abortus (strain 2308) OX=359391 GN=BAB1_1283 PE=4 SV=1	BAB1_1283	4.0545	6.14156e-05
	Q2YJM2	Protein SlyX homolog OS=Brucella abortus (strain 2308) OX=359391 GN=slyX PE=3 SV=1	slyX	1.5752	0.00640102
	Q2YKW0	Multicopper oxidase, type 1:Multicopper oxidase, copper-binding:Twin-arginine translocation pathway signal OS=Brucella abortus (strain 2308) OX=359391 GN=BAB2_0534 PE=4 SV=1	BAB2_0534	2.1009	0.0355799
	Q2YR82	Generic methyltransferase OS=Brucella abortus (strain 2308) OX=359391 GN=BAB1_1987 PE=4 SV=1	BAB1_1987	2.6281	4.93682e-05
	Q2YQ47	Uncharacterized protein OS=Brucella abortus (strain 2308) OX=359391 GN=BAB1_1043 PE=4 SV=1	BAB1_1043	1.8325	1.50043e-08
	Q578J2	Alkyl hydroperoxide reductase AhpD OS=Brucella abortus biovar 1 (strain 9-941) OX=262698 GN=ahpD PE=3 SV=1	ahpD	2.603	3.59596e-05
	Q2YLR4	Diaminopimelate epimerase OS=Brucella abortus (strain 2308) OX=359391 GN=dapF PE=3 SV=1	dapF	1.7844	0.000988533
	Q2YQJ7	Uncharacterized protein OS=Brucella abortus (strain 2308) OX=359391 GN=BAB1_1336 PE=4 SV=1	BAB1_1336	1.6902	0.010554
	Q2YNI1	Aldose 1-epimerase OS=Brucella abortus (strain 2308) OX=359391 GN=galM PE=3 SV=1	galM	2.0588	0.000519909
	Q2YM20	Neutral zinc metallopeptidases, zinc-binding region:Putative neutral zinc metallopeptidase OS=Brucella abortus (strain 2308) OX=359391 GN=BAB1_1504 PE=4 SV=1	BAB1_1504	1.5463	0.000282639
	Q577F1	Probable acid stress chaperone HdeA OS=Brucella abortus biovar 1 (strain 9-941) OX=262698 GN=hdeA PE=3 SV=1	hdeA	28.9683	4.12478e-07
	Q57EQ1	Invasion associated locus B family protein(predicted) OS=Brucella abortus biovar 1 (strain 9-941) OX=262698 GN=BruAb1_0488 PE=4 SV=1	BruAb1_0488	1.724	0.0031337
	P0C536	Type IV secretion system putative outer membrane lipoprotein BruAb2_0058 OS=Brucella abortus biovar 1 (strain 9-941) OX=262698 GN=BruAb2_0058 PE=3 SV=1	BruAb2_0058	2.2477	0.00375644
	Q57BU2	Hypothetical glycine betaine/L-proline ABC transporter, periplasmic glycine betaine-binding protein OS=Brucella abortus biovar 1 (strain 9-941) OX=262698 GN=BruAb1_1566 PE=4 SV=1	BruAb1_1566	2.7589	1.59475e-06
	F8WJR5	ABC transporter extracellular solute binding protein OS=Brucella abortus biovar 1 (strain 9-941) OX=262698 GN=BruAb2_1043 PE=3 SV=1	BruAb2_1043	1.8282	0.0287449
	Q578F0	Transporter, TrkA family OS=Brucella abortus biovar 1 (strain 9-941) OX=262698 GN=BruAb2_0567 PE=4 SV=1	BruAb2_0567	7.9724	0.00040319
	F8WJU1	Transcriptional regulator, GntR family OS=Brucella abortus biovar 1 (strain 9-941) OX=262698 GN=BruAb2_0941 PE=4 SV=1	BruAb2_0941	1.6652	0.0379191
	Q579F5	2-dehydro-3-deoxyphosphogalactonate aldolase, hypothetical OS=Brucella abortus biovar 1 (strain 9-941) OX=262698 GN=BruAb2_0295 PE=3 SV=1	BruAb2_0295	1.9266	3.57506e-05
	Q57BR1	Putrescine-binding periplasmic protein OS=Brucella abortus biovar 1 (strain 9-941) OX=262698 GN=BruAb1_1599 PE=3 SV=1	BruAb1_1599	2.1555	4.26788e-05
	Q577B7	Hypothetical sugar-binding protein OS=Brucella abortus biovar 1 (strain 9-941) OX=262698 GN=BruAb2_0879 PE=4 SV=1	BruAb2_0879	1.8702	0.00245064
	Q57CJ6	TerB domain-containing protein OS=Brucella abortus biovar 1 (strain 9-941) OX=262698 GN=BruAb1_1303 PE=4 SV=1	BruAb1_1303	1.733	0.00982998
	Q57FL3	Heat shock protein, Hsp20 family OS=Brucella abortus biovar 1 (strain 9-941) OX=262698 GN=BruAb1_0159 PE=3 SV=1	BruAb1_0159	6.038	1.14535e-06
	Q57CK6	Putative lipoprotein(predicted) OS=Brucella abortus biovar 1 (strain 9-941) OX=262698 GN=BruAb1_1291 PE=4 SV=1	BruAb1_1291	1.817	0.000189492
	Q57BC0	Hypothetical peptidase OS=Brucella abortus biovar 1 (strain 9-941) OX=262698 GN=BruAb1_1746 PE=4 SV=1	BruAb1_1746	2.8204	3.38793e-07
	Q57DR6	Glutathione S-transferase family protein OS=Brucella abortus biovar 1 (strain 9-941) OX=262698 GN=BruAb1_0852 PE=4 SV=1	BruAb1_0852	1.6279	0.000202327
	Q57F35	Uncharacterized protein OS=Brucella abortus biovar 1 (strain 9-941) OX=262698 GN=BruAb1_0349 PE=4 SV=1	BruAb1_0349	10.9236	8.48603e-06
	F8WJU3	Transcriptional regulator, GntR family OS=Brucella abortus biovar 1 (strain 9-941) OX=262698 GN=BruAb2_1014 PE=4 SV=1	BruAb2_1014	1.5358	0.00694425
	Q2YQ55	Proline-rich extensin OS=Brucella abortus (strain 2308) OX=359391 GN=BAB1_1035 PE=4 SV=1	BAB1_1035	5.2449	0.00626443
	Q577D7	DUF3597 domain-containing protein OS=Brucella abortus biovar 1 (strain 9-941) OX=262698 GN=BruAb2_0856 PE=4 SV=1	BruAb2_0856	2.517	7.79738e-06
	Q576P8	Peptide methionine sulfoxide reductase MsrA OS=Brucella abortus biovar 1 (strain 9-941) OX=262698 GN=msrA PE=3 SV=1	msrA	1.5607	0.00036308
	Q577Z5	UPF0173 metal-dependent hydrolase BruAb2_0628 OS=Brucella abortus biovar 1 (strain 9-941) OX=262698 GN=BruAb2_0628 PE=3 SV=1	BruAb2_0628	1.7878	0.000405081
	Q579B2	UPF0434 protein BruAb2_0341 OS=Brucella abortus biovar 1 (strain 9-941) OX=262698 GN=BruAb2_0341 PE=3 SV=1	BruAb2_0341	2.0233	0.000569489
	Q57F20	Invasion protein B homolog BruAb1_0366 OS=Brucella abortus biovar 1 (strain 9-941) OX=262698 GN=BruAb1_0366 PE=3 SV=1	BruAb1_0366	1.9756	0.000178557
	Q2YQD3	ATP-dependent DNA ligase OS=Brucella abortus (strain 2308) OX=359391 GN=BAB1_1384 PE=4 SV=1	BAB1_1384	3.5717	4.06931e-05
	Q2YRZ3	Uncharacterized protein OS=Brucella abortus (strain 2308) OX=359391 GN=BAB1_1751 PE=4 SV=1	BAB1_1751	6.8931	0.000208036
	Q2YMM2	5-hydroxyisourate hydrolase OS=Brucella abortus (strain 2308) OX=359391 GN=BAB1_0532 PE=1 SV=1	BAB1_0532	2.5134	5.14863e-05
	Q2YNP2	Biotin carboxyl carrier protein of acetyl-CoA carboxylase OS=Brucella abortus (strain 2308) OX=359391 GN=accB PE=4 SV=1	accB	1.5362	0.00141402
	Q2YPE0	HTH cro/C1-type domain-containing protein OS=Brucella abortus (strain 2308) OX=359391 GN=BAB1_0295 PE=4 SV=1	BAB1_0295	1.9918	0.00566684
	Q2YMT6	DUF1214 domain-containing protein OS=Brucella abortus (strain 2308) OX=359391 GN=BAB1_0606 PE=4 SV=1	BAB1_0606	1.5531	0.000359818
	Q2YKP7	Twin-arginine translocation pathway signal OS=Brucella abortus (strain 2308) OX=359391 GN=BAB2_0607 PE=4 SV=1	BAB2_0607	2.591	0.000242969
	Q2YM72	Uncharacterized protein OS=Brucella abortus (strain 2308) OX=359391 GN=BAB1_1295 PE=4 SV=1	BAB1_1295	2.134	0.00291304
	Q2YRN3	Thioesterase superfamily OS=Brucella abortus (strain 2308) OX=359391 GN=BAB1_1528 PE=3 SV=1	BAB1_1528	3.7593	8.43773e-07
	Q2YP67	Bacterial extracellular solute-binding protein, family 1 OS=Brucella abortus (strain 2308) OX=359391 GN=BAB1_0238 PE=4 SV=1	BAB1_0238	9.0508	1.05062e-05
	Q2YIV7	VOC domain-containing protein OS=Brucella abortus (strain 2308) OX=359391 GN=BAB2_0272 PE=4 SV=1	BAB2_0272	17.2488	0.00132647
	Q2YP57	ThiamineS OS=Brucella abortus (strain 2308) OX=359391 GN=BAB1_0217 PE=4 SV=1	BAB1_0217	1.5043	0.0086917
	Q2YJV3	Periplasmic binding protein/LacI transcriptional regulator OS=Brucella abortus (strain 2308) OX=359391 GN=BAB2_0938 PE=4 SV=1	BAB2_0938	2.3367	6.59777e-05
	Q2YPU4	Uncharacterized protein OS=Brucella abortus (strain 2308) OX=359391 GN=BAB1_1419 PE=4 SV=1	BAB1_1419	3.3274	0.00189254
	Q2YJY8	Uncharacterized protein OS=Brucella abortus (strain 2308) OX=359391 GN=BAB2_0896 PE=4 SV=1	BAB2_0896	2.2345	0.0028961
	Q2YLB9	Leu/Ile/Val-binding protein family OS=Brucella abortus (strain 2308) OX=359391 GN=BAB2_0282 PE=4 SV=1	BAB2_0282	3.4376	0.000612434
	Q2YMZ7	Uncharacterized protein OS=Brucella abortus (strain 2308) OX=359391 GN=BAB1_0686 PE=4 SV=1	BAB1_0686	2.8977	9.69822e-06
	Q578J8	IolC myo-catabolism protein OS=Brucella abortus biovar 1 (strain 9-941) OX=262698 GN=BruAb2_0517 PE=4 SV=1	BruAb2_0517	3.2739	0.000206763
	Q2YJ11	UPF0309 protein BAB2_0325 OS=Brucella abortus (strain 2308) OX=359391 GN=BAB2_0325 PE=3 SV=1	BAB2_0325	1.5763	0.00807498
	Q2YRH5	DNA gyrase, subunit B OS=Brucella abortus (strain 2308) OX=359391 GN=BAB1_1675 PE=4 SV=1	BAB1_1675	4.4398	5.28296e-05
	Q2YIH7	Uncharacterized protein OS=Brucella abortus (strain 2308) OX=359391 GN=BAB2_0207 PE=4 SV=1	BAB2_0207	1.6969	8.21599e-05
	Q2YQZ9	Calcium-binding EF-hand OS=Brucella abortus (strain 2308) OX=359391 GN=BAB1_2075 PE=3 SV=1	BAB1_2075	3.4556	1.85433e-07
	Q2YJ08	Esterase/lipase/thioesterase, active site OS=Brucella abortus (strain 2308) OX=359391 GN=BAB2_0244 PE=4 SV=1	BAB2_0244	1.7894	0.00284884
	Q2YR20	Uncharacterized protein OS=Brucella abortus (strain 2308) OX=359391 GN=BAB1_2054 PE=4 SV=1	BAB1_2054	2.0203	2.50551e-06
	Q2YN89	Gly-zipper_YMGG domain-containing protein OS=Brucella abortus (strain 2308) OX=359391 GN=BAB1_0758 PE=4 SV=1	BAB1_0758	1.7874	0.00236572
	Q2YQG4	Alpha/beta hydrolase fold:Esterase/lipase/thioesterase, active site:Prolyl aminopeptidase S33:Alpha/beta hydrolase OS=Brucella abortus (strain 2308) OX=359391 GN=BAB1_1282 PE=4 SV=1	BAB1_1282	1.7561	9.04487e-05
	Q2YR70	Uncharacterized protein OS=Brucella abortus (strain 2308) OX=359391 GN=BAB1_1999 PE=4 SV=1	BAB1_1999	3.5295	0.00391186
	Q2YMK7	Lipoprotein, putative OS=Brucella abortus (strain 2308) OX=359391 GN=BAB1_0511 PE=4 SV=1	BAB1_0511	3.0044	1.13962e-05
	Q2YMI2	Glutathione-dependent peroxiredoxin OS=Brucella abortus (strain 2308) OX=359391 GN=BAB1_0504 PE=3 SV=1	BAB1_0504	1.5221	0.00223108
	Q2YKD8	ATPase, BadF/BadG/BcrA/BcrD type OS=Brucella abortus (strain 2308) OX=359391 GN=BAB2_0724 PE=4 SV=1	BAB2_0724	2.1697	0.0397405
	Q2YJQ0	Selenoprotein W-related OS=Brucella abortus (strain 2308) OX=359391 GN=BAB2_0999 PE=4 SV=1	BAB2_0999	2.5834	0.000156729
	Q2YNW6	Response regulator receiver OS=Brucella abortus (strain 2308) OX=359391 GN=BAB1_0099 PE=4 SV=1	BAB1_0099	2.2525	0.00182897
	Q2YN44	DNA polymerase III chi subunit, HolC OS=Brucella abortus (strain 2308) OX=359391 GN=BAB1_0711 PE=4 SV=1	BAB1_0711	2.1735	0.00161325
	Q2YLY4	Uncharacterized protein OS=Brucella abortus (strain 2308) OX=359391 GN=BAB1_1543 PE=4 SV=1	BAB1_1543	2.6323	1.02087e-05
	Q2YQQ1	Bacterial regulatory protein, MarR family OS=Brucella abortus (strain 2308) OX=359391 GN=BAB1_2181 PE=4 SV=1	BAB1_2181	7.2681	0.000254796
	Q2YRY2	Uncharacterized protein OS=Brucella abortus (strain 2308) OX=359391 GN=BAB1_1591 PE=4 SV=1	BAB1_1591	3.4625	4.46929e-05
	Q2YQI7	Basic-leucine zipper (BZIP) transcription factor OS=Brucella abortus (strain 2308) OX=359391 GN=BAB1_1693 PE=4 SV=1	BAB1_1693	2.4301	3.26075e-06
	Q2YJV7	RES domain-containing protein OS=Brucella abortus (strain 2308) OX=359391 GN=BAB2_0933 PE=3 SV=1	BAB2_0933	4.3008	0.00107306
	Q2YQD1	Periplasmic binding protein OS=Brucella abortus (strain 2308) OX=359391 GN=BAB1_1366 PE=4 SV=1	BAB1_1366	1.5463	0.00303705
	Q2YNJ4	Uncharacterized protein OS=Brucella abortus (strain 2308) OX=359391 GN=BAB1_0863 PE=4 SV=1	BAB1_0863	2.2307	4.97026e-05
	Q2YRW7	Uncharacterized protein OS=Brucella abortus (strain 2308) OX=359391 GN=BAB1_1202 PE=4 SV=1	BAB1_1202	2.1444	0.00498913
	Q2YPT0	Uncharacterized protein OS=Brucella abortus (strain 2308) OX=359391 GN=BAB1_1433 PE=4 SV=1	BAB1_1433	2.8414	0.00042035
	Q2YQA8	N-acetyltransferase domain-containing protein OS=Brucella abortus (strain 2308) OX=359391 GN=BAB1_1610 PE=4 SV=1	BAB1_1610	2.4914	0.00131264
	Q2YNW3	Formate/nitrite transporter OS=Brucella abortus (strain 2308) OX=359391 GN=BAB1_0102 PE=4 SV=1	BAB1_0102	2.0769	3.08214e-05
	Q2YK26	Peptidase family T4 OS=Brucella abortus (strain 2308) OX=359391 GN=BAB2_0854 PE=3 SV=1	BAB2_0854	1.8706	0.000974213
	Q577P0	Hypothetical glyoxalase OS=Brucella abortus biovar 1 (strain 9-941) OX=262698 GN=BruAb2_0742 PE=4 SV=1	BruAb2_0742	2.6241	0.000926707
	Q57C58	Transcriptional regulator, ArsR family OS=Brucella abortus biovar 1 (strain 9-941) OX=262698 GN=BruAb1_1446 PE=4 SV=1	BruAb1_1446	2.0993	3.18805e-05
	Q57A75	Inosine-uridine preferring nucleoside hydrolase OS=Brucella abortus biovar 1 (strain 9-941) OX=262698 GN=iunH PE=4 SV=1	iunH	1.8768	0.00553795
	Q57CK5	Branched-chain amino acid ABC transporter, periplasmic amino acid-binding protein, hypothetical OS=Brucella abortus biovar 1 (strain 9-941) OX=262698 GN=BruAb1_1294 PE=4 SV=1	BruAb1_1294	2.76	0.000251415
	Q57B68	TPM_phosphatase domain-containing protein OS=Brucella abortus biovar 1 (strain 9-941) OX=262698 GN=BruAb1_1800 PE=4 SV=1	BruAb1_1800	1.6549	0.000817645
	Q578G1	DUF3775 domain-containing protein(predicted) OS=Brucella abortus biovar 1 (strain 9-941) OX=262698 GN=BruAb2_0556 PE=4 SV=1	BruAb2_0556	2.9329	0.000242243
	Q578M1	Glycine betaine/L-proline ABC transporter, periplasmic glycine betaine-binding protein, hypothetical OS=Brucella abortus biovar 1 (strain 9-941) OX=262698 GN=BruAb2_0494 PE=4 SV=1	BruAb2_0494	1.7081	0.000335713
	Q57E47	DinB(predicted) OS=Brucella abortus biovar 1 (strain 9-941) OX=262698 GN=BruAb1_0712 PE=3 SV=1	BruAb1_0712	1.5073	0.0057185
	Q57B33	Uncharacterized protein OS=Brucella abortus biovar 1 (strain 9-941) OX=262698 GN=BruAb1_1837 PE=4 SV=1	BruAb1_1837	1.6813	0.000674453
	Q57BA9	Heme-binding protein(predicted) OS=Brucella abortus biovar 1 (strain 9-941) OX=262698 GN=BruAb1_1757 PE=4 SV=1	BruAb1_1757	1.5453	5.67325e-05
	Q57AK7	Bacterial luciferase family protein OS=Brucella abortus biovar 1 (strain 9-941) OX=262698 GN=BruAb1_2026 PE=4 SV=1	BruAb1_2026	3.5988	0.0010297
	Q57FG7	ABC transporter, periplasmic substrate-binding protein OS=Brucella abortus biovar 1 (strain 9-941) OX=262698 GN=BruAb1_0208 PE=4 SV=1	BruAb1_0208	8.9725	4.25907e-06
	Q57FG2	ThiD, phosphomethylpyrimidine kinase OS=Brucella abortus biovar 1 (strain 9-941) OX=262698 GN=thiD PE=4 SV=1	thiD	3.1976	0.000132942
	Q57AX9	Hypothetical exported protein(predicted) OS=Brucella abortus biovar 1 (strain 9-941) OX=262698 GN=BruAb1_1895 PE=4 SV=1	BruAb1_1895	2.5617	9.34522e-05
	Q57DK5	DUF2155 domain-containing protein(predicted) OS=Brucella abortus biovar 1 (strain 9-941) OX=262698 GN=BruAb1_0915 PE=4 SV=1	BruAb1_0915	2.3623	1.02482e-05
	Q57ED7	Hypothetical exported protein(predicted) OS=Brucella abortus biovar 1 (strain 9-941) OX=262698 GN=BruAb1_0622 PE=4 SV=1	BruAb1_0622	2.7177	0.00106302
	Q57BY7	Purine nucleoside phosphorylase OS=Brucella abortus biovar 1 (strain 9-941) OX=262698 GN=BruAb1_1519 PE=3 SV=1	BruAb1_1519	1.9188	0.00393826
	Q578W3	Methylase_S domain-containing protein OS=Brucella abortus biovar 1 (strain 9-941) OX=262698 GN=BruAb2_0392 PE=3 SV=1	BruAb2_0392	3.5904	2.79604e-05
	Q578R7	Hypothetical cytosolic protein(predicted) OS=Brucella abortus biovar 1 (strain 9-941) OX=262698 GN=BruAb2_0443 PE=4 SV=1	BruAb2_0443	1.7125	0.00471038
	Q579J7	D-isomer specific 2-hydroxyacid dehydrogenase family protein OS=Brucella abortus biovar 1 (strain 9-941) OX=262698 GN=BruAb2_0251 PE=3 SV=1	BruAb2_0251	1.8639	0.000128212
	Q578C1	Uncharacterized protein OS=Brucella abortus biovar 1 (strain 9-941) OX=262698 GN=BruAb2_0601 PE=4 SV=1	BruAb2_0601	2.106	0.00400345
	Q57D17	CinA, competence/damage-inducible protein CinA OS=Brucella abortus biovar 1 (strain 9-941) OX=262698 GN=cinA PE=4 SV=1	cinA	1.8795	0.00572447
	Q57DF3	DUF1508 domain-containing protein OS=Brucella abortus biovar 1 (strain 9-941) OX=262698 GN=BruAb1_0978 PE=4 SV=1	BruAb1_0978	2.2984	0.00203657
	Q57D36	Uncharacterized protein OS=Brucella abortus biovar 1 (strain 9-941) OX=262698 GN=BruAb1_1107 PE=4 SV=1	BruAb1_1107	4.7695	7.82815e-06
	Q2YQ23	NAD(P)H dehydrogenase (quinone) OS=Brucella abortus (strain 2308) OX=359391 GN=BAB1_1070 PE=1 SV=1	BAB1_1070	3.6686	3.3734e-05
	Q57D55	Site-specific recombinase, resolvase family OS=Brucella abortus biovar 1 (strain 9-941) OX=262698 GN=BruAb1_0287 PE=4 SV=1	BruAb1_0287	12.402	4.93768e-07
	Q577M3	Transcriptional regulator, TetR family OS=Brucella abortus biovar 1 (strain 9-941) OX=262698 GN=BruAb2_0760 PE=4 SV=1	BruAb2_0760	2.6088	0.000399537
	Q57DS7	DUF3008 family protein(predicted) OS=Brucella abortus biovar 1 (strain 9-941) OX=262698 GN=BruAb1_0840 PE=4 SV=1	BruAb1_0840	7.2241	0.000152385
	Q57AT4	EtfA, electron transfer flavoprotein, alpha subunit OS=Brucella abortus biovar 1 (strain 9-941) OX=262698 GN=etfA PE=3 SV=1	etfA	1.7819	0.000703284
	Q57ET9	DUF1344 domain-containing protein(predicted) OS=Brucella abortus biovar 1 (strain 9-941) OX=262698 GN=BruAb1_0449 PE=4 SV=1	BruAb1_0449	1.7492	0.00211148
	Q579X1	ABC transporter, periplasmic substrate-binding protein OS=Brucella abortus biovar 1 (strain 9-941) OX=262698 GN=BruAb2_0113 PE=4 SV=1	BruAb2_0113	2.7466	1.75404e-05
	Q57EX7	ATP synthase subunit b OS=Brucella abortus biovar 1 (strain 9-941) OX=262698 GN=atpF PE=3 SV=1	atpF	2.2006	7.68115e-05
	Q57AZ6	Glyoxalase family protein OS=Brucella abortus biovar 1 (strain 9-941) OX=262698 GN=BruAb1_1876 PE=4 SV=1	BruAb1_1876	2.3129	0.00101776
	Q57ED4	Outer membrane lipoprotein-related protein OS=Brucella abortus biovar 1 (strain 9-941) OX=262698 GN=BruAb1_0625 PE=4 SV=1	BruAb1_0625	2.2363	0.00092909
	Q579T3	DUF4381 domain-containing protein(predicted) OS=Brucella abortus biovar 1 (strain 9-941) OX=262698 GN=BruAb2_0157 PE=4 SV=1	BruAb2_0157	1.9894	0.00105894
	Q57E49	Hypothetical membrane spanning protein(predicted) OS=Brucella abortus biovar 1 (strain 9-941) OX=262698 GN=BruAb1_0710 PE=4 SV=1	BruAb1_0710	1.9751	0.00121828
	Q57DA7	Lipoprotein, hypothetical OS=Brucella abortus biovar 1 (strain 9-941) OX=262698 GN=BruAb1_1027 PE=4 SV=1	BruAb1_1027	2.0489	5.769e-05
	Q576Y8	DUF2384 domain-containing protein OS=Brucella abortus biovar 1 (strain 9-941) OX=262698 GN=BruAb2_0909 PE=4 SV=1	BruAb2_0909	4.7413	5.67335e-05
	Q57CN2	DUF3126 family protein(predicted) OS=Brucella abortus biovar 1 (strain 9-941) OX=262698 GN=BruAb1_1264 PE=4 SV=1	BruAb1_1264	1.9065	0.000652512
	Q57CG2	Sugar ABC transporter, periplasmic sugar-binding protein OS=Brucella abortus biovar 1 (strain 9-941) OX=262698 GN=BruAb1_1340 PE=4 SV=1	BruAb1_1340	3.8631	0.000106679
	Q57A92	Ferric uptake regulation protein OS=Brucella abortus biovar 1 (strain 9-941) OX=262698 GN=fur PE=3 SV=1	fur	2.2744	3.22211e-05
	Q577Q3	Nitroreductase domain-containing protein OS=Brucella abortus biovar 1 (strain 9-941) OX=262698 GN=BruAb2_0725 PE=4 SV=1	BruAb2_0725	2.782	0.000154005
	Q57A71	Lipoprotein, Bmp family OS=Brucella abortus biovar 1 (strain 9-941) OX=262698 GN=BruAb2_0010 PE=3 SV=1	BruAb2_0010	1.7894	0.000799755
	Q57BW6	Acetyltransferase, GNAT family OS=Brucella abortus biovar 1 (strain 9-941) OX=262698 GN=BruAb1_1540 PE=4 SV=1	BruAb1_1540	1.6183	0.018783
	Q57C43	Choloylglycine hydrolase family protein OS=Brucella abortus biovar 1 (strain 9-941) OX=262698 GN=BruAb1_1463 PE=3 SV=1	BruAb1_1463	1.9293	0.000348345
	Q57AZ8	TesB, acyl-CoA thioesterase II OS=Brucella abortus biovar 1 (strain 9-941) OX=262698 GN=tesB PE=3 SV=1	tesB	1.9006	1.82218e-05
	Q57DG2	GBBH-like_N domain-containing protein OS=Brucella abortus biovar 1 (strain 9-941) OX=262698 GN=BruAb1_0965 PE=4 SV=1	BruAb1_0965	1.8768	0.0369907
	Q57D95	Phosphohistidine phosphatase(predicted) OS=Brucella abortus biovar 1 (strain 9-941) OX=262698 GN=BruAb1_1040 PE=4 SV=1	BruAb1_1040	1.5761	7.85165e-06
	Q57FB2	HTH cro/C1-type domain-containing protein OS=Brucella abortus biovar 1 (strain 9-941) OX=262698 GN=BruAb1_0267 PE=4 SV=1	BruAb1_0267	2.6049	0.00108442
	Q57DP1	DUF1289 domain-containing protein(predicted) OS=Brucella abortus biovar 1 (strain 9-941) OX=262698 GN=BruAb1_0877 PE=4 SV=1	BruAb1_0877	1.8208	0.0011907
	Q57BC5	Thiamine diphosphokinase OS=Brucella abortus biovar 1 (strain 9-941) OX=262698 GN=BruAb1_1741 PE=4 SV=1	BruAb1_1741	6.8382	0.000347506
	Q57DX8	SmpA_OmlA domain-containing protein OS=Brucella abortus biovar 1 (strain 9-941) OX=262698 GN=BruAb1_0788 PE=4 SV=1	BruAb1_0788	2.4875	5.16567e-06
	Q577E5	Glutelin(predicted) OS=Brucella abortus biovar 1 (strain 9-941) OX=262698 GN=BruAb2_0848 PE=4 SV=1	BruAb2_0848	3.9551	0.0106307
	Q57B81	Putative lipoprotein(predicted) OS=Brucella abortus biovar 1 (strain 9-941) OX=262698 GN=BruAb1_1786 PE=4 SV=1	BruAb1_1786	2.1065	0.000184689
	Q578B1	DUF3572 family protein(predicted) OS=Brucella abortus biovar 1 (strain 9-941) OX=262698 GN=BruAb2_0612 PE=4 SV=1	BruAb2_0612	1.803	0.00425929
	Q57FX9	HIT domain-containing protein OS=Brucella abortus biovar 1 (strain 9-941) OX=262698 GN=BruAb1_0035 PE=4 SV=1	BruAb1_0035	2.0429	4.00523e-05
	Q578M6	Oxidoreductase, short-chain dehydrogenase/reductase family OS=Brucella abortus biovar 1 (strain 9-941) OX=262698 GN=BruAb2_0486 PE=4 SV=1	BruAb2_0486	3.6397	0.000142252
	Q57BD7	N5-carboxyaminoimidazole ribonucleotide mutase OS=Brucella abortus biovar 1 (strain 9-941) OX=262698 GN=purE PE=3 SV=1	purE	1.6583	0.0387927
	Q57FV0	Cytoplasmic protein(predicted) OS=Brucella abortus biovar 1 (strain 9-941) OX=262698 GN=BruAb1_0066 PE=4 SV=1	BruAb1_0066	1.8925	8.01124e-05
	Q579Q2	Uncharacterized protein OS=Brucella abortus biovar 1 (strain 9-941) OX=262698 GN=BruAb2_0188 PE=4 SV=1	BruAb2_0188	3.1976	0.000481024
	Q579T2	DUF2195 family protein(predicted) OS=Brucella abortus biovar 1 (strain 9-941) OX=262698 GN=BruAb2_0158 PE=4 SV=1	BruAb2_0158	2.862	0.000280734
	Q57E13	TniQ family protein(predicted) OS=Brucella abortus biovar 1 (strain 9-941) OX=262698 GN=BruAb1_0748 PE=4 SV=1	BruAb1_0748	15.4987	4.54353e-06
	Q577J9	Transcriptional regulator, GntR family OS=Brucella abortus biovar 1 (strain 9-941) OX=262698 GN=BruAb2_0791 PE=4 SV=1	BruAb2_0791	1.8252	0.00603478
	Q57CM6	GloA, lactoylglutathione lyase OS=Brucella abortus biovar 1 (strain 9-941) OX=262698 GN=gloA PE=4 SV=1	gloA	1.5737	0.00178622
	Q57DF1	BrnA antitoxin family protein(predicted) OS=Brucella abortus biovar 1 (strain 9-941) OX=262698 GN=BruAb1_0980 PE=4 SV=1	BruAb1_0980	5.9335	2.04125e-05
	Q577B6	Cyclic nucleotide-binding protein OS=Brucella abortus biovar 1 (strain 9-941) OX=262698 GN=BruAb2_0880 PE=4 SV=1	BruAb2_0880	2.2979	0.000164632
	F8WJQ9	Glycine cleavage system H protein OS=Brucella abortus biovar 1 (strain 9-941) OX=262698 GN=gcvH PE=3 SV=1	gcvH	2.1173	5.86438e-05
	Q577W3	ABM domain-containing protein OS=Brucella abortus biovar 1 (strain 9-941) OX=262698 GN=BruAb2_0661 PE=4 SV=1	BruAb2_0661	2.287	0.000697266
	Q57CB1	Protein HflK OS=Brucella abortus biovar 1 (strain 9-941) OX=262698 GN=hlfK PE=3 SV=1	hlfK	1.8512	0.000358662
	Q57B75	Uncharacterized conserved small protein(predicted) OS=Brucella abortus biovar 1 (strain 9-941) OX=262698 GN=BruAb1_1792 PE=3 SV=1	BruAb1_1792	2.5629	0.000588155
	Q579U7	3Beta_HSD domain-containing protein OS=Brucella abortus biovar 1 (strain 9-941) OX=262698 GN=BruAb2_0141 PE=4 SV=1	BruAb2_0141	1.6094	0.0416065
	Q57AB3	Acetyltransferase, GNAT family OS=Brucella abortus biovar 1 (strain 9-941) OX=262698 GN=BruAb1_2125 PE=4 SV=1	BruAb1_2125	1.9106	0.00596821
	Q57C38	Uncharacterized protein OS=Brucella abortus biovar 1 (strain 9-941) OX=262698 GN=BruAb1_1468 PE=4 SV=1	BruAb1_1468	1.5317	0.00351498
	Q57CW1	Transcriptional regulator, hypothetical OS=Brucella abortus biovar 1 (strain 9-941) OX=262698 GN=BruAb1_1185 PE=4 SV=1	BruAb1_1185	1.8666	0.0012516
	Q57BP9	Dihydroxyacetone kinase family OS=Brucella abortus biovar 1 (strain 9-941) OX=262698 GN=BruAb1_1613 PE=4 SV=1	BruAb1_1613	1.7804	0.0201453
	Q57F45	Uncharacterized protein OS=Brucella abortus biovar 1 (strain 9-941) OX=262698 GN=BruAb1_0339 PE=4 SV=1	BruAb1_0339	6.0798	3.07502e-06
	Q57D92	Proline-rich extensin(predicted) OS=Brucella abortus biovar 1 (strain 9-941) OX=262698 GN=BruAb1_1043 PE=4 SV=1	BruAb1_1043	2.0835	0.000109088
	Q578G0	FAD_binding_2 domain-containing protein OS=Brucella abortus biovar 1 (strain 9-941) OX=262698 GN=BruAb2_0557 PE=4 SV=1	BruAb2_0557	3.1613	4.59624e-05
	Q57C42	Outer membrane beta-barrel domain protein(predicted) OS=Brucella abortus biovar 1 (strain 9-941) OX=262698 GN=BruAb1_1464 PE=4 SV=1	BruAb1_1464	2.0204	0.00244463
	Q57BF5	DUF4164 family protein(predicted) OS=Brucella abortus biovar 1 (strain 9-941) OX=262698 GN=BruAb1_1710 PE=4 SV=1	BruAb1_1710	2.3953	0.000113569
	Q57BW8	Hypothetical cytosolic protein(predicted) OS=Brucella abortus biovar 1 (strain 9-941) OX=262698 GN=BruAb1_1538 PE=4 SV=1	BruAb1_1538	1.7682	0.00660075
	Q57EH6	Death-on-curing family protein OS=Brucella abortus biovar 1 (strain 9-941) OX=262698 GN=BruAb1_0579 PE=4 SV=1	BruAb1_0579	2.6	0.000107424
	Q57EH2	DUF2267 domain-containing protein(predicted) OS=Brucella abortus biovar 1 (strain 9-941) OX=262698 GN=BruAb1_0584 PE=4 SV=1	BruAb1_0584	4.2582	1.5835e-05
	Q57BD2	DUF1036 domain-containing protein(predicted) OS=Brucella abortus biovar 1 (strain 9-941) OX=262698 GN=BruAb1_1734 PE=4 SV=1	BruAb1_1734	1.7664	0.000832858
	Q57CV8	ElaB/YqjD/DUF883 family membrane-anchored ribosome-binding protein(predicted) OS=Brucella abortus biovar 1 (strain 9-941) OX=262698 GN=BruAb1_1188 PE=4 SV=1	BruAb1_1188	2.5399	3.80719e-05
	Q578D5	PcaL, 3-oxoadipate enol-lactone hydrolase OS=Brucella abortus biovar 1 (strain 9-941) OX=262698 GN=pcaL PE=4 SV=1	pcaL	2.7249	0.00053618
	Q578C7	Amino acid ABC transporter, periplasmic amino acid-binding protein OS=Brucella abortus biovar 1 (strain 9-941) OX=262698 GN=BruAb2_0594 PE=3 SV=1	BruAb2_0594	2.0658	0.000105356
	Q2YPT3	UPF0303 protein BAB1_1430 OS=Brucella abortus (strain 2308) OX=359391 GN=BAB1_1430 PE=3 SV=1	BAB1_1430	2.0628	0.000299333
other | Extracellular	Q2YN40	Nucleoside diphosphate kinase OS=Brucella abortus (strain 2308) OX=359391 GN=ndk PE=3 SV=1	ndk	2.2922	7.10209e-05
	Q2YLX9	Lipoprotein, putative OS=Brucella abortus (strain 2308) OX=359391 GN=BAB1_1548 PE=4 SV=1	BAB1_1548	2.2488	0.00382916
	Q2YLM7	Uncharacterized protein OS=Brucella abortus (strain 2308) OX=359391 GN=BAB1_1885 PE=4 SV=1	BAB1_1885	1.716	4.81189e-05

## Sheet: Down list
Subcellular localization	Protein accession	Protein description	Gene name	A19BG/A19 Ratio	A19BG/A19 P value
Cytoplasmic	Q9ZHS1	Cell cycle response regulator CtrA OS=Brucella abortus biovar 1 (strain 9-941) OX=262698 GN=ctrA PE=1 SV=1	ctrA	0.2151	6.57147e-05
	Q2YRL8	Beta-lactamase-like OS=Brucella abortus (strain 2308) OX=359391 GN=BAB1_1534 PE=4 SV=1	BAB1_1534	0.4962	7.34055e-05
	Q2YS29	NAD binding site:Pyridine nucleotide-disulphide oxidoreductase, class I:FAD-dependent pyridine nucleotide-disulphide oxidored OS=Brucella abortus (strain 2308) OX=359391 GN=BAB1_1411 PE=4 SV=1	BAB1_1411	0.3947	1.62278e-05
	Q2YRJ6	Uncharacterized protein OS=Brucella abortus (strain 2308) OX=359391 GN=BAB1_1189 PE=4 SV=1	BAB1_1189	0.4615	0.000384646
	Q2YKE7	Dihydrolipoamide acetyltransferase component of pyruvate dehydrogenase complex OS=Brucella abortus (strain 2308) OX=359391 GN=BAB2_0713 PE=3 SV=1	BAB2_0713	0.5457	0.00074739
	Q2YJV6	Carbohydrate kinase, FGGY:Heat shock protein Hsp70:Pentulose kinase OS=Brucella abortus (strain 2308) OX=359391 GN=BAB2_0934 PE=3 SV=1	BAB2_0934	0.5387	0.00163369
	Q2YQX3	PDDEXK_1 domain-containing protein OS=Brucella abortus (strain 2308) OX=359391 GN=BAB1_2104 PE=4 SV=1	BAB1_2104	0.6597	0.00086997
	Q2YQQ0	Cytosol aminopeptidase OS=Brucella abortus (strain 2308) OX=359391 GN=BAB1_2182 PE=3 SV=1	BAB1_2182	0.087	0.000324252
	Q2YPQ3	Molybdopterin molybdenumtransferase OS=Brucella abortus (strain 2308) OX=359391 GN=BAB1_0037 PE=3 SV=1	BAB1_0037	0.5639	0.00111902
	Q2YRW2	Helix-turn-helix motif OS=Brucella abortus (strain 2308) OX=359391 GN=BAB1_1209 PE=3 SV=1	BAB1_1209	0.5701	0.00203038
	Q2YKM9	GGDEF:Response regulator receiver OS=Brucella abortus (strain 2308) OX=359391 GN=BAB2_0630 PE=4 SV=1	BAB2_0630	0.3799	0.000154388
	Q2YLZ0	Cell division protein FtsA OS=Brucella abortus (strain 2308) OX=359391 GN=ftsA PE=3 SV=1	ftsA	0.3902	0.000126909
	Q2YK76	Bacterial regulatory protein LysR, HTH motif:LysR substrate binding domain OS=Brucella abortus (strain 2308) OX=359391 GN=BAB2_0793 PE=3 SV=1	BAB2_0793	0.6042	0.00158267
	Q2YKU3	Ppx/GppA phosphatase OS=Brucella abortus (strain 2308) OX=359391 GN=BAB2_0555 PE=4 SV=1	BAB2_0555	0.6263	0.00587916
	Q2YJA6	ATP/GTP-binding site motif A (P-loop):ABC transporter:AAA ATPase:Phosphoribulokinase OS=Brucella abortus (strain 2308) OX=359391 GN=BAB2_1158 PE=4 SV=1	BAB2_1158	0.5103	0.0054137
	Q2YRW1	Carboxyl transferase family:Acetyl-CoA carboxylase carboxyl transferase, beta subunit OS=Brucella abortus (strain 2308) OX=359391 GN=BAB1_1210 PE=4 SV=1	BAB1_1210	0.2813	0.00646405
	Q2YMH7	Amidophosphoribosyltransferase OS=Brucella abortus (strain 2308) OX=359391 GN=purF PE=3 SV=1	purF	0.2839	1.20923e-05
	Q2YPN4	30S ribosomal protein S1 OS=Brucella abortus (strain 2308) OX=359391 GN=rpsA PE=3 SV=1	rpsA	0.4741	7.12618e-06
	Q2YIK7	Uncharacterized protein OS=Brucella abortus (strain 2308) OX=359391 GN=BAB2_0234 PE=4 SV=1	BAB2_0234	0.5584	0.00606463
	Q2YLD7	DEAD/DEAH box helicase:Helicase, C-terminal:ATP/GTP-binding site motif A (P-loop):Aldehyde dehydrogenase OS=Brucella abortus (strain 2308) OX=359391 GN=BAB1_1781 PE=4 SV=1	BAB1_1781	0.6044	0.00207542
	Q2YJ15	DUF1338 domain-containing protein OS=Brucella abortus (strain 2308) OX=359391 GN=BAB2_0328 PE=4 SV=1	BAB2_0328	0.4384	9.48952e-05
	Q2YNF9	NADH dehydrogenase (Ubiquinone), 24 kDa subunit OS=Brucella abortus (strain 2308) OX=359391 GN=nuoE PE=3 SV=1	nuoE	0.435	6.56504e-05
	Q2YNP8	GCN5-related N-acetyltransferase OS=Brucella abortus (strain 2308) OX=359391 GN=BAB1_0919 PE=4 SV=1	BAB1_0919	0.247	0.0308148
	Q2YJ09	Sarcosine oxidase beta subunit OS=Brucella abortus (strain 2308) OX=359391 GN=BAB2_0330 PE=4 SV=1	BAB2_0330	0.6137	0.00167655
	Q2YRP3	Thioredoxin reductase OS=Brucella abortus (strain 2308) OX=359391 GN=trxB PE=3 SV=1	trxB	0.2377	0.000235393
	Q2YRM8	Cold-shock DNA-binding domain OS=Brucella abortus (strain 2308) OX=359391 GN=BAB1_1512 PE=4 SV=1	BAB1_1512	0.3074	1.56899e-05
	Q2YIM2	Haloacid dehalogenase/epoxide hydrolase:Haloacid dehalogenase-like hydrolase:HAD-superfamily hydrolase, subfamily IA, variant OS=Brucella abortus (strain 2308) OX=359391 GN=BAB2_0265 PE=4 SV=1	BAB2_0265	0.2009	0.000330507
	Q2YLZ7	Uncharacterized protein OS=Brucella abortus (strain 2308) OX=359391 GN=BAB1_1438 PE=4 SV=1	BAB1_1438	0.4464	0.000621893
	Q2YPJ1	5-aminolevulinate synthase OS=Brucella abortus (strain 2308) OX=359391 GN=BAB1_0349 PE=3 SV=1	BAB1_0349	0.1919	1.76382e-06
	Q2YNT5	Fumarate hydratase class I OS=Brucella abortus (strain 2308) OX=359391 GN=BAB1_0977 PE=3 SV=1	BAB1_0977	0.5387	3.90597e-05
	Q2YIW7	Type I restriction-modification system, S subunit OS=Brucella abortus (strain 2308) OX=359391 GN=hsdS PE=3 SV=1	hsdS	0.2231	1.13674e-05
	Q2YKI0	YbaK/prolyl-tRNA synthetase associated region OS=Brucella abortus (strain 2308) OX=359391 GN=BAB2_0679 PE=4 SV=1	BAB2_0679	0.1461	9.32648e-06
	Q2YP24	Uncharacterized protein OS=Brucella abortus (strain 2308) OX=359391 GN=BAB1_0183 PE=4 SV=1	BAB1_0183	0.0667	4.66162e-05
	Q2YRK1	Uncharacterized protein OS=Brucella abortus (strain 2308) OX=359391 GN=BAB1_1667 PE=4 SV=1	BAB1_1667	0.2086	2.67293e-05
	Q2YNY9	Uncharacterized protein OS=Brucella abortus (strain 2308) OX=359391 GN=BAB1_0147 PE=4 SV=1	BAB1_0147	0.4127	5.77204e-05
	Q2YNM4	L-isoaspartyl protein carboxyl methyltransferase OS=Brucella abortus (strain 2308) OX=359391 GN=BAB1_0906 PE=3 SV=1	BAB1_0906	0.099	5.62255e-05
	Q2YN76	ATP/GTP-binding site motif A (P-loop) OS=Brucella abortus (strain 2308) OX=359391 GN=BAB1_0742 PE=4 SV=1	BAB1_0742	0.1553	0.000149844
	Q2YN62	Immunoglobulin/major histocompatibility complex:Prokaryotic molybdopterin oxidoreductase:Molybdopterin oxidoreductase:Molydop OS=Brucella abortus (strain 2308) OX=359391 GN=BAB1_0728 PE=3 SV=1	BAB1_0728	0.5582	0.00586525
	Q2YP28	Uroporphyrinogen III methylase OS=Brucella abortus (strain 2308) OX=359391 GN=cysG PE=3 SV=1	cysG	0.0828	5.34523e-06
	Q2YP44	3'(2'),5'-bisphosphate nucleotidase CysQ OS=Brucella abortus (strain 2308) OX=359391 GN=cysQ PE=3 SV=1	cysQ	0.2	0.000683942
	Q2YIY7	Putative peptidoglycan binding domain 1:Sel1-like repeat OS=Brucella abortus (strain 2308) OX=359391 GN=BAB2_0413 PE=4 SV=1	BAB2_0413	0.1934	0.00011219
	Q2YL95	Eubacterial/plasma membrane H+-transporting two-sector ATPase, C subunit:AMP-dependent synthetase and ligase OS=Brucella abortus (strain 2308) OX=359391 GN=BAB2_0014 PE=4 SV=1	BAB2_0014	0.1419	0.0207429
	Q2YQV6	Uncharacterized protein OS=Brucella abortus (strain 2308) OX=359391 GN=BAB1_2125 PE=4 SV=1	BAB1_2125	0.5398	8.69845e-06
	Q2YMK4	Haloacid dehalogenase/epoxide hydrolase:Haloacid dehalogenase-like hydrolase:HAD-superfamily hydrolase, subfamily IA, variant OS=Brucella abortus (strain 2308) OX=359391 GN=BAB1_0514 PE=4 SV=1	BAB1_0514	0.5691	0.000542868
	Q2YRK2	Pseudouridine synthase OS=Brucella abortus (strain 2308) OX=359391 GN=BAB1_1666 PE=3 SV=1	BAB1_1666	0.4758	0.000268527
	Q2YPF1	Eukaryotic thiol (Cysteine) protease:ATPase, E1-E2 type:Blood group Rhesus C/E and D polypeptide:Haloacid dehalogenase/epoxid OS=Brucella abortus (strain 2308) OX=359391 GN=BAB1_0318 PE=4 SV=1	BAB1_0318	0.6397	0.0474094
	Q2YQW3	DUF218 domain-containing protein OS=Brucella abortus (strain 2308) OX=359391 GN=BAB1_2114 PE=4 SV=1	BAB1_2114	0.2109	0.000260572
	Q2YMF7	3,4-dihydroxy-2-butanone 4-phosphate synthase OS=Brucella abortus (strain 2308) OX=359391 GN=ribB PE=3 SV=1	ribB	0.6498	0.000729308
	Q2YQ53	Dipeptide epimerase OS=Brucella abortus (strain 2308) OX=359391 GN=BAB1_1037 PE=3 SV=1	BAB1_1037	0.6533	0.000195853
	Q2YLT8	Acetyltransf_6 domain-containing protein OS=Brucella abortus (strain 2308) OX=359391 GN=BAB1_1948 PE=4 SV=1	BAB1_1948	0.43	0.0178492
	Q2YJX5	Ubiquinone biosynthesis protein UbiV OS=Brucella abortus (strain 2308) OX=359391 GN=ubiV PE=3 SV=1	ubiV	0.0635	1.24591e-06
	Q2YKB4	3-oxoacyl-(Acyl-carrier-protein) synthase III, putative OS=Brucella abortus (strain 2308) OX=359391 GN=BAB2_0748 PE=4 SV=1	BAB2_0748	0.2179	0.0208331
	Q2YNQ4	ATP/GTP-binding site motif A (P-loop):ABC transporter:AAA ATPase OS=Brucella abortus (strain 2308) OX=359391 GN=BAB1_0949 PE=3 SV=1	BAB1_0949	0.4508	5.90583e-05
	Q2YJX6	Ubiquinone biosynthesis protein UbiU OS=Brucella abortus (strain 2308) OX=359391 GN=ubiU PE=3 SV=1	ubiU	0.1774	1.89729e-06
	Q2YJN9	Glucokinase OS=Brucella abortus (strain 2308) OX=359391 GN=glk PE=3 SV=1	glk	0.6029	0.00176836
	Q2YLP6	50S ribosomal protein L19 OS=Brucella abortus (strain 2308) OX=359391 GN=rplS PE=3 SV=1	rplS	0.4689	0.00025566
	Q2YM11	50S ribosomal protein L11 OS=Brucella abortus (strain 2308) OX=359391 GN=rplK PE=3 SV=1	rplK	0.5098	0.000152964
	Q2YQ27	Xanthine-guanine phosphoribosyltransferase OS=Brucella abortus (strain 2308) OX=359391 GN=gpt PE=3 SV=1	gpt	0.1717	0.00011975
	Q2YNV3	Dual-specificity RNA methyltransferase RlmN OS=Brucella abortus (strain 2308) OX=359391 GN=rlmN PE=3 SV=1	rlmN	0.4771	0.000156402
	Q2YPK3	Flagellar transcriptional regulator FtcR OS=Brucella abortus (strain 2308) OX=359391 GN=BAB1_0370 PE=4 SV=1	BAB1_0370	0.2933	1.04415e-05
	Q2YNM2	ATP/GTP-binding site motif A (P-loop) OS=Brucella abortus (strain 2308) OX=359391 GN=BAB1_0908 PE=4 SV=1	BAB1_0908	0.5629	0.000173252
	Q2YNF8	NADH-quinone oxidoreductase subunit F OS=Brucella abortus (strain 2308) OX=359391 GN=BAB1_0827 PE=3 SV=1	BAB1_0827	0.2333	4.53778e-06
	Q2YPC4	TIR domain-containing protein OS=Brucella abortus (strain 2308) OX=359391 GN=BAB1_0279 PE=4 SV=1	BAB1_0279	0.391	0.00277898
	Q2YL66	Sugar transporter superfamily:Acyl-CoA dehydrogenase, C-terminal:Acyl-CoA dehydrogenase, central domain OS=Brucella abortus (strain 2308) OX=359391 GN=BAB2_0442 PE=3 SV=1	BAB2_0442	0.3862	4.79629e-05
	Q2YKQ0	Coenzyme A transferase 1:Coenzyme A transferase OS=Brucella abortus (strain 2308) OX=359391 GN=pcaI PE=3 SV=1	pcaI	0.5907	0.000785613
	Q2YMQ8	Glycosyl transferase, group 1 OS=Brucella abortus (strain 2308) OX=359391 GN=BAB1_0563 PE=4 SV=1	BAB1_0563	0.6031	0.00123156
	Q2YKY3	Pyridine nucleotide-disulphide oxidoreductase, class-II:NAD binding site:Adrenodoxin reductase:Pyridine nucleotide-disulphide OS=Brucella abortus (strain 2308) OX=359391 GN=BAB2_0511 PE=4 SV=1	BAB2_0511	0.5546	0.00237939
	Q2YM83	Cytochrome c heme-binding site:Cytochrome C oxidase, mono-heme subunit/FixO OS=Brucella abortus (strain 2308) OX=359391 GN=ccoO PE=4 SV=1	ccoO	0.3991	0.000250003
	Q2YQ36	RNA polymerase-binding transcription factor DksA OS=Brucella abortus (strain 2308) OX=359391 GN=dksA PE=3 SV=1	dksA	0.331	0.000944678
	Q2YIF8	Bacterial regulatory protein, LuxR family:Response regulator receiver OS=Brucella abortus (strain 2308) OX=359391 GN=BAB2_0041 PE=4 SV=1	BAB2_0041	0.4404	0.0185307
	Q2YN78	Uncharacterized protein OS=Brucella abortus (strain 2308) OX=359391 GN=BAB1_0740 PE=4 SV=1	BAB1_0740	0.1576	1.83523e-06
	Q2YNC2	Ubiquinol-cytochrome C chaperone OS=Brucella abortus (strain 2308) OX=359391 GN=BAB1_0795 PE=3 SV=1	BAB1_0795	0.6303	0.000564797
	Q2YNX8	Lipocalin-related protein and Bos/Can/Equ allergen:ATP-dependent helicase, DEAD-box:DEAD/DEAH box helicase:Helicase, C-termin OS=Brucella abortus (strain 2308) OX=359391 GN=BAB1_0121 PE=3 SV=1	BAB1_0121	0.2132	3.27916e-05
	Q2YK23	Bacterial regulatory protein LysR, HTH motif:LysR substrate binding domain OS=Brucella abortus (strain 2308) OX=359391 GN=BAB2_0857 PE=3 SV=1	BAB2_0857	0.201	1.93265e-05
	Q2YQ89	Glycosyltransferase OS=Brucella abortus (strain 2308) OX=359391 GN=BAB1_0999 PE=4 SV=1	BAB1_0999	0.4057	9.17045e-06
	Q2YLV2	Cysteine synthase OS=Brucella abortus (strain 2308) OX=359391 GN=BAB1_1968 PE=4 SV=1	BAB1_1968	0.5848	0.00242498
	Q2YRH8	RNA polymerase sigma factor OS=Brucella abortus (strain 2308) OX=359391 GN=BAB1_1672 PE=3 SV=1	BAB1_1672	0.3376	0.00292411
	Q2YP88	L-fuconate dehydratase OS=Brucella abortus (strain 2308) OX=359391 GN=BAB1_0248 PE=4 SV=1	BAB1_0248	0.6127	0.0125056
	Q2YJK8	Alpha/beta hydrolase fold:Biotin/lipoyl attachment:Esterase/lipase/thioesterase, active site:2-oxo acid dehydrogenase, acyltr OS=Brucella abortus (strain 2308) OX=359391 GN=BAB2_1042 PE=3 SV=1	BAB2_1042	0.4644	0.0172105
	Q2YQ19	Alanine--tRNA ligase OS=Brucella abortus (strain 2308) OX=359391 GN=BAB1_1074 PE=3 SV=1	BAB1_1074	0.2251	8.35732e-05
	Q2YNX7	DNA gyrase subunit B OS=Brucella abortus (strain 2308) OX=359391 GN=gyrB PE=3 SV=1	gyrB	0.6093	6.71644e-05
	Q2YP45	Multifunctional fusion protein OS=Brucella abortus (strain 2308) OX=359391 GN=cysN PE=3 SV=1	cysN	0.1145	0.000909915
	Q2YL22	Bacterial regulatory protein, MarR family OS=Brucella abortus (strain 2308) OX=359391 GN=BAB2_0468 PE=4 SV=1	BAB2_0468	0.6447	0.0103744
	Q2YP37	Ribokinase:Carbohydrate kinase, PfkB OS=Brucella abortus (strain 2308) OX=359391 GN=BAB1_0168 PE=4 SV=1	BAB1_0168	0.6397	1.74464e-05
	Q2YRR3	Cyclic pyranopterin monophosphate synthase OS=Brucella abortus (strain 2308) OX=359391 GN=moaC PE=3 SV=1	moaC	0.5288	0.00394964
	Q2YPH2	Ornithine carbamoyltransferase OS=Brucella abortus (strain 2308) OX=359391 GN=arcB PE=3 SV=1	arcB	0.6162	0.00055048
	Q2YNR6	Molybdenum cofactor guanylyltransferase OS=Brucella abortus (strain 2308) OX=359391 GN=mobA PE=3 SV=1	mobA	0.1921	5.43922e-05
	Q2YNG0	NADH-quinone oxidoreductase subunit D OS=Brucella abortus (strain 2308) OX=359391 GN=nuoD PE=3 SV=1	nuoD	0.3692	7.00402e-06
	Q2YNC7	NADH-quinone oxidoreductase subunit C OS=Brucella abortus (strain 2308) OX=359391 GN=nuoC PE=3 SV=1	nuoC	0.5178	1.60001e-05
	Q2YNZ0	DNA mismatch repair protein MutS OS=Brucella abortus (strain 2308) OX=359391 GN=mutS PE=3 SV=1	mutS	0.1822	2.10988e-05
	Q2YNW9	Dihydroxy-acid dehydratase OS=Brucella abortus (strain 2308) OX=359391 GN=ilvD PE=3 SV=1	ilvD	0.4901	1.06636e-05
	Q2YR56	50S ribosomal protein L28 OS=Brucella abortus (strain 2308) OX=359391 GN=rpmB PE=3 SV=1	rpmB	0.2805	2.1384e-05
	Q2YRA1	30S ribosomal protein S3 OS=Brucella abortus (strain 2308) OX=359391 GN=rpsC PE=3 SV=1	rpsC	0.2803	1.24688e-05
	Q2YRA6	50S ribosomal protein L24 OS=Brucella abortus (strain 2308) OX=359391 GN=rplX PE=3 SV=1	rplX	0.5604	0.00120519
	Q2YLL8	50S ribosomal protein L27 OS=Brucella abortus (strain 2308) OX=359391 GN=rpmA PE=3 SV=1	rpmA	0.3109	0.000275487
	Q2YQD6	Urease accessory protein UreG 2 OS=Brucella abortus (strain 2308) OX=359391 GN=ureG2 PE=3 SV=1	ureG2	0.3874	0.000422284
	Q2YRA8	30S ribosomal protein S14 OS=Brucella abortus (strain 2308) OX=359391 GN=rpsN PE=3 SV=1	rpsN	0.3844	0.000130388
	Q2YRA3	50S ribosomal protein L29 OS=Brucella abortus (strain 2308) OX=359391 GN=rpmC PE=3 SV=1	rpmC	0.4673	3.51167e-05
	Q2YM06	50S ribosomal protein L2 OS=Brucella abortus (strain 2308) OX=359391 GN=rplB PE=3 SV=1	rplB	0.3883	1.69513e-05
	Q2YM04	50S ribosomal protein L4 OS=Brucella abortus (strain 2308) OX=359391 GN=rplD PE=3 SV=1	rplD	0.6451	0.00762906
	Q2YRA4	30S ribosomal protein S17 OS=Brucella abortus (strain 2308) OX=359391 GN=rpsQ PE=3 SV=1	rpsQ	0.4921	0.00432116
	Q2YLY7	UDP-N-acetylenolpyruvoylglucosamine reductase OS=Brucella abortus (strain 2308) OX=359391 GN=murB PE=3 SV=1	murB	0.5269	5.01099e-05
	Q2YRT2	50S ribosomal protein L18 OS=Brucella abortus (strain 2308) OX=359391 GN=rplR PE=3 SV=1	rplR	0.6025	0.00942399
	Q2YRA5	50S ribosomal protein L14 OS=Brucella abortus (strain 2308) OX=359391 GN=rplN PE=3 SV=1	rplN	0.4741	8.83962e-05
	Q2YRF3	50S ribosomal protein L31 OS=Brucella abortus (strain 2308) OX=359391 GN=rpmE PE=3 SV=1	rpmE	0.0818	8.40146e-06
	Q2YIN9	tRNA uridine(34) hydroxylase OS=Brucella abortus (strain 2308) OX=359391 GN=trhO PE=3 SV=1	trhO	0.0212	0.00130151
	Q2YR05	7-methyl-GTP pyrophosphatase OS=Brucella abortus (strain 2308) OX=359391 GN=BAB1_2069 PE=3 SV=1	BAB1_2069	0.5494	0.00230308
	Q2YQB2	tRNA-specific 2-thiouridylase MnmA OS=Brucella abortus (strain 2308) OX=359391 GN=mnmA PE=3 SV=1	mnmA	0.2119	4.65132e-06
	Q2YNP4	Leucyl/phenylalanyl-tRNA--protein transferase OS=Brucella abortus (strain 2308) OX=359391 GN=aat PE=3 SV=2	aat	0.2177	0.00888038
	Q2YRC4	Elongation factor P OS=Brucella abortus (strain 2308) OX=359391 GN=efp PE=3 SV=1	efp	0.0269	0.000278367
	Q2YP46	Sulfate adenylyltransferase subunit 2 OS=Brucella abortus (strain 2308) OX=359391 GN=cysD PE=3 SV=1	cysD	0.0802	0.000580154
	Q2YMI4	Homoserine kinase OS=Brucella abortus (strain 2308) OX=359391 GN=thrB PE=3 SV=1	thrB	0.4591	0.00836716
	Q2YL51	3-isopropylmalate dehydratase small subunit OS=Brucella abortus (strain 2308) OX=359391 GN=leuD PE=3 SV=1	leuD	0.1908	0.0010014
	Q2YLZ2	UDP-3-O-acyl-N-acetylglucosamine deacetylase OS=Brucella abortus (strain 2308) OX=359391 GN=lpxC PE=3 SV=1	lpxC	0.4958	0.00213417
	Q2YL58	3-isopropylmalate dehydrogenase OS=Brucella abortus (strain 2308) OX=359391 GN=leuB PE=3 SV=1	leuB	0.2137	1.11417e-06
	Q2YPX2	ATP-dependent Clp protease ATP-binding subunit ClpX OS=Brucella abortus (strain 2308) OX=359391 GN=clpX PE=3 SV=1	clpX	0.1914	1.97944e-06
	Q2YMF0	1-deoxy-D-xylulose-5-phosphate synthase OS=Brucella abortus (strain 2308) OX=359391 GN=dxs PE=3 SV=1	dxs	0.1259	0.000831874
	Q2YPN6	3-phosphoshikimate 1-carboxyvinyltransferase OS=Brucella abortus (strain 2308) OX=359391 GN=aroA PE=3 SV=1	aroA	0.6661	0.000665657
	Q2YQK2	Cobyric acid synthase OS=Brucella abortus (strain 2308) OX=359391 GN=cobQ PE=3 SV=1	cobQ	0.2341	0.000918532
	Q2YQZ0	Imidazole glycerol phosphate synthase subunit HisH OS=Brucella abortus (strain 2308) OX=359391 GN=hisH PE=3 SV=1	hisH	0.6498	0.00534977
	Q2YLL7	50S ribosomal protein L21 OS=Brucella abortus (strain 2308) OX=359391 GN=rplU PE=3 SV=1	rplU	0.4451	0.00446753
	Q2YPI2	Pantothenate synthetase OS=Brucella abortus (strain 2308) OX=359391 GN=panC PE=3 SV=1	panC	0.6586	0.00376005
	Q2YLZ8	30S ribosomal protein S12 OS=Brucella abortus (strain 2308) OX=359391 GN=rpsL PE=3 SV=1	rpsL	0.2251	7.30625e-05
	Q2YMK2	Modification methylase BabI OS=Brucella abortus (strain 2308) OX=359391 GN=ccrM PE=3 SV=1	ccrM	0.0858	0.000555491
	Q2YNL7	Methylenetetrahydrofolate--tRNA-(uracil-5-)-methyltransferase TrmFO OS=Brucella abortus (strain 2308) OX=359391 GN=trmFO PE=3 SV=1	trmFO	0.177	2.13007e-05
	Q2YS08	(p)ppGpp synthase OS=Brucella abortus (strain 2308) OX=359391 GN=BAB1_1570 PE=3 SV=1	BAB1_1570	0.3561	0.00035356
	Q2YJ99	Amidase OS=Brucella abortus (strain 2308) OX=359391 GN=BAB2_0097 PE=4 SV=1	BAB2_0097	0.0228	8.72676e-07
	Q2YJX9	Uncharacterized protein OS=Brucella abortus (strain 2308) OX=359391 GN=BAB2_0909 PE=4 SV=1	BAB2_0909	0.0212	0.000424526
	Q2YKP0	DNA-directed DNA polymerase OS=Brucella abortus (strain 2308) OX=359391 GN=BAB2_0617 PE=4 SV=1	BAB2_0617	0.2551	5.49753e-05
	Q2YIK6	Bacterial regulatory proteins, IclR family OS=Brucella abortus (strain 2308) OX=359391 GN=BAB2_0235 PE=4 SV=1	BAB2_0235	0.4537	0.000590002
	Q2YNH5	DNA polymerase III subunit alpha OS=Brucella abortus (strain 2308) OX=359391 GN=BAB1_0845 PE=4 SV=1	BAB1_0845	0.2503	5.86372e-07
	Q2YJZ4	Ribonucleoside-diphosphate reductase subunit beta OS=Brucella abortus (strain 2308) OX=359391 GN=nrdF PE=3 SV=1	nrdF	0.2495	6.26433e-06
	Q2YJI5	Lipocalin-related protein and Bos/Can/Equ allergen:Aminotransferase class-III OS=Brucella abortus (strain 2308) OX=359391 GN=BAB2_1066 PE=3 SV=1	BAB2_1066	0.5779	0.0219132
	Q2YLL1	Uncharacterized protein OS=Brucella abortus (strain 2308) OX=359391 GN=BAB1_1864 PE=4 SV=1	BAB1_1864	0.384	1.15935e-07
	Q2YIZ1	Ribosomal protein S16:DEAD/DEAH box helicase:Helicase, C-terminal:ATP/GTP-binding site motif A (P-loop) OS=Brucella abortus (strain 2308) OX=359391 GN=BAB2_0409 PE=4 SV=1	BAB2_0409	0.338	0.00149735
	Q2YQ15	SAM (And some other nucleotide) binding motif:TPR repeat OS=Brucella abortus (strain 2308) OX=359391 GN=BAB1_1085 PE=4 SV=1	BAB1_1085	0.2771	0.00308333
	Q2YLV1	MTTase N-terminal domain-containing protein OS=Brucella abortus (strain 2308) OX=359391 GN=BAB1_1933 PE=4 SV=1	BAB1_1933	0.0525	0.00450078
	Q2YLM0	GCN5-related N-acetyltransferase OS=Brucella abortus (strain 2308) OX=359391 GN=BAB1_1855 PE=4 SV=1	BAB1_1855	0.2508	0.0171426
	Q2YIL2	Beta and gamma crystallin:Aminotransferase class-III OS=Brucella abortus (strain 2308) OX=359391 GN=BAB2_0309 PE=3 SV=1	BAB2_0309	0.6581	0.00136834
	Q2YQ21	ATP-dependent helicase, DEAD-box:DEAD/DEAH box helicase:Helicase, C-terminal:ATP/GTP-binding site motif A (P-loop) OS=Brucella abortus (strain 2308) OX=359391 GN=BAB1_1072 PE=3 SV=1	BAB1_1072	0.0757	3.78505e-05
	Q2YP32	dITP/XTP pyrophosphatase OS=Brucella abortus (strain 2308) OX=359391 GN=BAB1_0175 PE=3 SV=1	BAB1_0175	0.5576	0.00253011
	Q2YRE9	2Fe-2S ferredoxins, iron-sulfur binding protein OS=Brucella abortus (strain 2308) OX=359391 GN=BAB1_1732 PE=4 SV=1	BAB1_1732	0.301	4.80566e-05
	Q2YRR7	Triosephosphate isomerase OS=Brucella abortus (strain 2308) OX=359391 GN=tpiA-1 PE=3 SV=1	tpiA-1	0.546	0.000150976
	Q2YPS6	Metallopeptidase family M24 OS=Brucella abortus (strain 2308) OX=359391 GN=BAB1_1437 PE=3 SV=1	BAB1_1437	0.5902	3.28486e-05
	Q2YKL0	DNA topoisomerase 4 subunit B OS=Brucella abortus (strain 2308) OX=359391 GN=parE PE=3 SV=1	parE	0.4706	0.000491558
	Q2YQL3	Uroporphyrin-III C/tetrapyrrole (Corrin/Porphyrin) methyltransferase:Uroporphiryn-III C-methyltransferase:Pecorrin-4 C11-meth OS=Brucella abortus (strain 2308) OX=359391 GN=BAB1_1320 PE=3 SV=1	BAB1_1320	0.0752	0.000223691
	Q2YK44	Probable phosphoketolase OS=Brucella abortus (strain 2308) OX=359391 GN=BAB2_0836 PE=3 SV=1	BAB2_0836	0.6351	0.00012117
	Q2YQP6	30S ribosomal protein S20 OS=Brucella abortus (strain 2308) OX=359391 GN=rpsT PE=3 SV=1	rpsT	0.5	4.80844e-05
	Q2YM07	30S ribosomal protein S19 OS=Brucella abortus (strain 2308) OX=359391 GN=rpsS PE=3 SV=1	rpsS	0.438	1.76966e-06
	Q2YMH2	50S ribosomal protein L9 OS=Brucella abortus (strain 2308) OX=359391 GN=rplI PE=3 SV=1	rplI	0.659	0.00138482
	Q2YM03	50S ribosomal protein L3 OS=Brucella abortus (strain 2308) OX=359391 GN=rplC PE=3 SV=1	rplC	0.3628	1.28833e-05
	Q2YKM8	50S ribosomal protein L33 OS=Brucella abortus (strain 2308) OX=359391 GN=rpmG PE=3 SV=1	rpmG	0.5757	0.0174133
	Q2YMG9	30S ribosomal protein S6 OS=Brucella abortus (strain 2308) OX=359391 GN=rpsF PE=3 SV=1	rpsF	0.5885	0.000531941
	Q2YQ07	Threonine--tRNA ligase OS=Brucella abortus (strain 2308) OX=359391 GN=thrS PE=3 SV=1	thrS	0.6147	0.000148023
	Q2YRJ1	30S ribosomal protein S2 OS=Brucella abortus (strain 2308) OX=359391 GN=rpsB PE=3 SV=1	rpsB	0.4894	5.0161e-06
	Q2YRA9	30S ribosomal protein S8 OS=Brucella abortus (strain 2308) OX=359391 GN=rpsH PE=3 SV=1	rpsH	0.5371	0.000609214
	Q2YM15	DNA-directed RNA polymerase subunit beta OS=Brucella abortus (strain 2308) OX=359391 GN=rpoB PE=3 SV=1	rpoB	0.5935	4.7082e-05
	Q2YND8	50S ribosomal protein L13 OS=Brucella abortus (strain 2308) OX=359391 GN=rplM PE=3 SV=1	rplM	0.5362	2.76764e-05
	Q2YQH6	tRNA(Ile)-lysidine synthase OS=Brucella abortus (strain 2308) OX=359391 GN=tilS PE=3 SV=1	tilS	0.1439	0.000580119
	Q2YRU1	50S ribosomal protein L17 OS=Brucella abortus (strain 2308) OX=359391 GN=rplQ PE=3 SV=1	rplQ	0.5208	0.00302212
	Q2YQ63	Phosphoglycolate phosphatase OS=Brucella abortus (strain 2308) OX=359391 GN=cbbZ PE=3 SV=1	cbbZ	0.3449	8.98866e-06
	Q2YQX4	Nucleotidyl transferase OS=Brucella abortus (strain 2308) OX=359391 GN=BAB1_2103 PE=4 SV=1	BAB1_2103	0.3756	0.00291706
	Q2YPM1	Pyridine nucleotide-disulphide oxidoreductase, class I:D-isomer specific 2-hydroxyacid dehydrogenase, NAD binding domain OS=Brucella abortus (strain 2308) OX=359391 GN=BAB1_0005 PE=4 SV=1	BAB1_0005	0.5965	0.000453121
	Q2YNA9	Exopolyphosphatase OS=Brucella abortus (strain 2308) OX=359391 GN=BAB1_0773 PE=3 SV=1	BAB1_0773	0.4782	0.00117952
	Q57DU3	NADH-quinone oxidoreductase subunit I OS=Brucella abortus biovar 1 (strain 9-941) OX=262698 GN=nuoI PE=3 SV=1	nuoI	0.3044	9.21943e-06
	Q2YNG3	Phosphoribosylformylglycinamidine synthase subunit PurQ OS=Brucella abortus (strain 2308) OX=359391 GN=purQ PE=3 SV=1	purQ	0.4386	0.000113471
	Q57AJ7	tRNA uridine 5-carboxymethylaminomethyl modification enzyme MnmG OS=Brucella abortus biovar 1 (strain 9-941) OX=262698 GN=mnmG PE=3 SV=1	mnmG	0.2905	0.000147285
	Q57C97	Serine/threonine protein kinase(predicted) OS=Brucella abortus biovar 1 (strain 9-941) OX=262698 GN=BruAb1_1407 PE=4 SV=1	BruAb1_1407	0.0574	2.61179e-06
	Q578A6	MutT/nudix family protein OS=Brucella abortus biovar 1 (strain 9-941) OX=262698 GN=BruAb2_0617 PE=4 SV=1	BruAb2_0617	0.5753	0.0118961
	Q578A4	Ribonuclease R OS=Brucella abortus biovar 1 (strain 9-941) OX=262698 GN=rnr PE=3 SV=1	rnr	0.6456	0.000531183
	Q57CV1	BhbA, methylmalonyl-CoA mutase OS=Brucella abortus biovar 1 (strain 9-941) OX=262698 GN=bhbA PE=4 SV=1	bhbA	0.6337	0.00578057
	Q57EJ7	Hypothetical mannosyltransferase OS=Brucella abortus biovar 1 (strain 9-941) OX=262698 GN=BruAb1_0552 PE=4 SV=1	BruAb1_0552	0.369	2.54764e-05
	Q57C54	Energy-dependent translational throttle protein EttA OS=Brucella abortus biovar 1 (strain 9-941) OX=262698 GN=ettA PE=3 SV=1	ettA	0.6234	6.85583e-05
	Q57FJ2	Methylated-DNA--[protein]-cysteine S-methyltransferase OS=Brucella abortus biovar 1 (strain 9-941) OX=262698 GN=ogt PE=4 SV=1	ogt	0.4649	0.000462968
	P0C110	Acyl-[acyl-carrier-protein]--UDP-N-acetylglucosamine O-acyltransferase OS=Brucella abortus biovar 1 (strain 9-941) OX=262698 GN=lpxA PE=3 SV=1	lpxA	0.3376	0.000150356
	Q57BB6	Hypothetical transcriptional regulator OS=Brucella abortus biovar 1 (strain 9-941) OX=262698 GN=BruAb1_1750 PE=4 SV=1	BruAb1_1750	0.1463	0.000109985
	Q57BU6	Methyltransferase(predicted) OS=Brucella abortus biovar 1 (strain 9-941) OX=262698 GN=BruAb1_1562 PE=4 SV=1	BruAb1_1562	0.1368	0.0439014
	Q57A50	Alpha-ketoglutarate dehydrogenase OS=Brucella abortus biovar 1 (strain 9-941) OX=262698 GN=BruAb2_0032 PE=4 SV=1	BruAb2_0032	0.2985	0.014296
	Q578R6	Carbonic anhydrase OS=Brucella abortus biovar 1 (strain 9-941) OX=262698 GN=BruAb2_0444 PE=3 SV=1	BruAb2_0444	0.0843	0.00138162
	Q57CD2	NUDIX hydrolase(predicted) OS=Brucella abortus biovar 1 (strain 9-941) OX=262698 GN=BruAb1_1371 PE=4 SV=1	BruAb1_1371	0.0653	2.11269e-06
	Q578K6	Bifunctional protein PutA OS=Brucella abortus biovar 1 (strain 9-941) OX=262698 GN=BruAb2_0509 PE=3 SV=1	BruAb2_0509	0.6479	0.000136304
	Q57FZ4	Biotin carboxylase OS=Brucella abortus biovar 1 (strain 9-941) OX=262698 GN=BruAb1_0018 PE=4 SV=1	BruAb1_0018	0.3934	0.0083178
	Q577B2	NarJ, respiratory nitrate reductase, delta subunit OS=Brucella abortus biovar 1 (strain 9-941) OX=262698 GN=narJ PE=4 SV=1	narJ	0.0407	4.01228e-05
	Q57AN1	BolA, bolA protein OS=Brucella abortus biovar 1 (strain 9-941) OX=262698 GN=bolA PE=3 SV=1	bolA	0.5991	0.00256886
	Q578N2	Microcystinase C OS=Brucella abortus biovar 1 (strain 9-941) OX=262698 GN=BruAb2_0480 PE=3 SV=1	BruAb2_0480	0.255	9.12684e-05
	Q57FI9	Methionine synthase OS=Brucella abortus biovar 1 (strain 9-941) OX=262698 GN=metH PE=3 SV=1	metH	0.145	4.18851e-07
	Q57CJ1	Hypothetical CobW OS=Brucella abortus biovar 1 (strain 9-941) OX=262698 GN=BruAb1_1308 PE=3 SV=1	BruAb1_1308	0.3671	1.18478e-05
	Q57E48	ABC transporter, ATP-binding protein OS=Brucella abortus biovar 1 (strain 9-941) OX=262698 GN=BruAb1_0711 PE=3 SV=1	BruAb1_0711	0.6141	0.0136342
	Q578A1	Hypothetical DprA, DNA processing protein OS=Brucella abortus biovar 1 (strain 9-941) OX=262698 GN=BruAb2_0622 PE=3 SV=1	BruAb2_0622	0.4415	0.00783743
	Q577C8	Ribonucleoside-diphosphate reductase OS=Brucella abortus biovar 1 (strain 9-941) OX=262698 GN=nrdE PE=3 SV=1	nrdE	0.0585	2.79143e-06
	Q578Z5	YigZ family protein(predicted) OS=Brucella abortus biovar 1 (strain 9-941) OX=262698 GN=BruAb2_0358 PE=3 SV=1	BruAb2_0358	0.1436	0.000401536
	Q57C81	D-alanine--D-alanine ligase OS=Brucella abortus biovar 1 (strain 9-941) OX=262698 GN=ddlB PE=3 SV=1	ddlB	0.5227	0.000348842
	Q578R8	Lysine--tRNA ligase OS=Brucella abortus biovar 1 (strain 9-941) OX=262698 GN=lysS PE=3 SV=1	lysS	0.5847	2.30234e-05
	Q57A40	Response regulator OS=Brucella abortus biovar 1 (strain 9-941) OX=262698 GN=BruAb2_0043 PE=4 SV=1	BruAb2_0043	0.5522	0.000979828
	Q57F38	Chitooligosaccharide deacetylase OS=Brucella abortus biovar 1 (strain 9-941) OX=262698 GN=BruAb1_0346 PE=3 SV=1	BruAb1_0346	0.362	0.000964406
	Q57F08	Transcriptional regulator, LysR family OS=Brucella abortus biovar 1 (strain 9-941) OX=262698 GN=BruAb1_0378 PE=3 SV=1	BruAb1_0378	0.3412	0.00167204
	Q57DN2	HesB/YadR/YfhF family protein OS=Brucella abortus biovar 1 (strain 9-941) OX=262698 GN=BruAb1_0887 PE=3 SV=1	BruAb1_0887	0.2138	0.00892718
	Q576K3	RfF2 family protein OS=Brucella abortus biovar 1 (strain 9-941) OX=262698 GN=BruAb2_1057 PE=4 SV=1	BruAb2_1057	0.3145	0.000745778
	Q577D4	Cell division inhibitor MinD OS=Brucella abortus biovar 1 (strain 9-941) OX=262698 GN=minD PE=3 SV=1	minD	0.1577	3.07573e-05
	Q57B51	Glycosyltransferase family 2 protein(predicted) OS=Brucella abortus biovar 1 (strain 9-941) OX=262698 GN=BruAb1_1818 PE=4 SV=1	BruAb1_1818	0.0722	1.05496e-05
	Q57AW0	Mutator mutT protein, hypothetical OS=Brucella abortus biovar 1 (strain 9-941) OX=262698 GN=BruAb1_1915 PE=3 SV=1	BruAb1_1915	0.4791	6.91897e-05
	Q57FQ1	3-5 exonuclease family protein OS=Brucella abortus biovar 1 (strain 9-941) OX=262698 GN=BruAb1_0117 PE=4 SV=1	BruAb1_0117	0.6151	0.0417463
	Q57AQ1	Exodeoxyribonuclease III OS=Brucella abortus biovar 1 (strain 9-941) OX=262698 GN=xth-2 PE=3 SV=1	xth-2	0.1795	4.57477e-05
	Q576W9	CbbQ/NirQ/NorQ/GpvN family protein OS=Brucella abortus biovar 1 (strain 9-941) OX=262698 GN=BruAb2_0929 PE=4 SV=1	BruAb2_0929	0.1556	9.85638e-08
	Q57AW9	ATPase n2B(predicted) OS=Brucella abortus biovar 1 (strain 9-941) OX=262698 GN=BruAb1_1905 PE=4 SV=1	BruAb1_1905	0.4419	0.00414514
	F8WJR6	Hemerythrin domain-containing protein OS=Brucella abortus biovar 1 (strain 9-941) OX=262698 GN=BruAb2_0935 PE=4 SV=1	BruAb2_0935	0.0377	0.000251655
	Q57BY3	DUF87 domain-containing protein OS=Brucella abortus biovar 1 (strain 9-941) OX=262698 GN=BruAb1_1523 PE=4 SV=1	BruAb1_1523	0.2407	0.000241571
	Q57FJ6	CysI, sulfite reductase (NADPH) hemoprotein beta-component OS=Brucella abortus biovar 1 (strain 9-941) OX=262698 GN=cysI PE=4 SV=1	cysI	0.2178	0.000268886
	Q57CJ3	Corrinoid adenosyltransferase OS=Brucella abortus biovar 1 (strain 9-941) OX=262698 GN=cobO PE=3 SV=1	cobO	0.4706	0.000922127
	Q57DT7	Biotin--acetyl-CoA-carboxylase ligase OS=Brucella abortus biovar 1 (strain 9-941) OX=262698 GN=BruAb1_0830 PE=4 SV=1	BruAb1_0830	0.5361	0.0027255
	Q57FK1	Heme chaperone HemW OS=Brucella abortus biovar 1 (strain 9-941) OX=262698 GN=BruAb1_0172 PE=3 SV=1	BruAb1_0172	0.0583	0.00379438
	Q57DC9	Pseudouridine synthase OS=Brucella abortus biovar 1 (strain 9-941) OX=262698 GN=BruAb1_1005 PE=3 SV=1	BruAb1_1005	0.6108	0.00197094
	Q577X8	Transcription-repair-coupling factor OS=Brucella abortus biovar 1 (strain 9-941) OX=262698 GN=mfd PE=3 SV=1	mfd	0.6378	8.93139e-05
	Q57BS2	Flagellar export protein FliJ(predicted) OS=Brucella abortus biovar 1 (strain 9-941) OX=262698 GN=BruAb1_1587 PE=4 SV=1	BruAb1_1587	0.147	0.0030709
	Q57ET0	TlyA, hemolysin A OS=Brucella abortus biovar 1 (strain 9-941) OX=262698 GN=tlyA PE=4 SV=1	tlyA	0.1215	2.91882e-05
	Q57C84	Cell division protein FtsZ OS=Brucella abortus biovar 1 (strain 9-941) OX=262698 GN=ftsZ PE=3 SV=1	ftsZ	0.3378	1.47984e-05
	Q578J9	IolD, TPP-requiring enzyme OS=Brucella abortus biovar 1 (strain 9-941) OX=262698 GN=iolD PE=3 SV=1	iolD	0.5229	0.00401794
	Q57DH3	ATP-dependent RNA helicase, DEAD/DEAH box family OS=Brucella abortus biovar 1 (strain 9-941) OX=262698 GN=BruAb1_0947 PE=3 SV=1	BruAb1_0947	0.4516	1.5019e-07
	Q57DU5	NADH-quinone oxidoreductase OS=Brucella abortus biovar 1 (strain 9-941) OX=262698 GN=nuoG PE=3 SV=1	nuoG	0.3989	4.7893e-06
	Q577D3	Probable septum site-determining protein MinC OS=Brucella abortus biovar 1 (strain 9-941) OX=262698 GN=minC PE=3 SV=1	minC	0.5626	0.000229876
	Q57FK0	Ribosomal RNA small subunit methyltransferase I OS=Brucella abortus biovar 1 (strain 9-941) OX=262698 GN=rsmI PE=3 SV=1	rsmI	0.4866	2.49411e-05
	Q57BM6	RNA polymerase sigma factor RpoH OS=Brucella abortus biovar 1 (strain 9-941) OX=262698 GN=rpoH PE=3 SV=1	rpoH	0.5767	0.00031523
	Q57CM5	Single-stranded-DNA-specific exonuclease RecJ OS=Brucella abortus biovar 1 (strain 9-941) OX=262698 GN=recJ PE=3 SV=1	recJ	0.5618	0.000120809
	Q57EP6	4-hydroxy-3-methylbut-2-enyl diphosphate reductase OS=Brucella abortus biovar 1 (strain 9-941) OX=262698 GN=ispH PE=3 SV=2	ispH	0.5613	0.000497259
	Q57CC7	Ketol-acid reductoisomerase (NADP(+)) OS=Brucella abortus biovar 1 (strain 9-941) OX=262698 GN=ilvC PE=3 SV=1	ilvC	0.4805	5.33387e-06
	Q57AN6	Cobalamin biosynthesis protein, hypothetical OS=Brucella abortus biovar 1 (strain 9-941) OX=262698 GN=BruAb1_1996 PE=4 SV=1	BruAb1_1996	0.4911	0.000240821
	Q579Y0	Glycosyl transferase(predicted) OS=Brucella abortus biovar 1 (strain 9-941) OX=262698 GN=BruAb2_0104 PE=4 SV=1	BruAb2_0104	0.4889	0.0308341
	Q57C51	D-lyxose/D-mannose family sugar isomerase(predicted) OS=Brucella abortus biovar 1 (strain 9-941) OX=262698 GN=BruAb1_1455 PE=4 SV=1	BruAb1_1455	0.3755	0.00628992
	Q576U8	Aldehyde dehydrogenase family protein OS=Brucella abortus biovar 1 (strain 9-941) OX=262698 GN=BruAb2_0954 PE=3 SV=1	BruAb2_0954	0.1257	4.89677e-06
	Q57AI7	DNA polymerase III subunit epsilon OS=Brucella abortus biovar 1 (strain 9-941) OX=262698 GN=dnaQ PE=4 SV=1	dnaQ	0.327	0.00167352
	Q57C59	Methylenetetrahydrofolate reductase OS=Brucella abortus biovar 1 (strain 9-941) OX=262698 GN=metF PE=3 SV=1	metF	0.4458	2.33056e-05
	Q57DZ9	Ribonuclease D OS=Brucella abortus biovar 1 (strain 9-941) OX=262698 GN=rnd PE=3 SV=1	rnd	0.3936	8.22091e-05
	Q57D80	L-threonine dehydratase OS=Brucella abortus biovar 1 (strain 9-941) OX=262698 GN=ilvA PE=3 SV=1	ilvA	0.5214	0.00385689
	Q578L1	Glycine cleavage system T protein OS=Brucella abortus biovar 1 (strain 9-941) OX=262698 GN=gcvT PE=3 SV=1	gcvT	0.1395	5.37919e-06
	Q57B23	Release factor glutamine methyltransferase OS=Brucella abortus biovar 1 (strain 9-941) OX=262698 GN=hemK PE=3 SV=1	hemK	0.3646	9.91243e-06
	Q579I6	Hypothetical oxidoreductase OS=Brucella abortus biovar 1 (strain 9-941) OX=262698 GN=BruAb2_0263 PE=4 SV=1	BruAb2_0263	0.4911	1.09989e-05
	Q57B91	Transcriptional regulator, MarR family OS=Brucella abortus biovar 1 (strain 9-941) OX=262698 GN=BruAb1_1776 PE=4 SV=1	BruAb1_1776	0.3726	0.000116235
	Q57F28	Ferredoxin--NADP reductase OS=Brucella abortus biovar 1 (strain 9-941) OX=262698 GN=fpr PE=3 SV=1	fpr	0.6089	0.000591172
	Q57DV7	Uncharacterized protein OS=Brucella abortus biovar 1 (strain 9-941) OX=262698 GN=BruAb1_0810 PE=4 SV=1	BruAb1_0810	0.3412	0.00015952
	Q57AM2	Cobalamin synthesis protein/P47K family protein OS=Brucella abortus biovar 1 (strain 9-941) OX=262698 GN=BruAb1_2010 PE=3 SV=1	BruAb1_2010	0.6083	0.000382905
	Q57E18	Acetyltransferase, GNAT family OS=Brucella abortus biovar 1 (strain 9-941) OX=262698 GN=BruAb1_0742 PE=4 SV=1	BruAb1_0742	0.1364	0.00599125
	Q57A04	Probable branched-chain-amino-acid aminotransferase OS=Brucella abortus biovar 1 (strain 9-941) OX=262698 GN=BruAb2_0079 PE=4 SV=1	BruAb2_0079	0.5479	0.000491423
	Q578A3	DNA topoisomerase 1 OS=Brucella abortus biovar 1 (strain 9-941) OX=262698 GN=topA PE=3 SV=1	topA	0.4141	9.93455e-05
	Q57BR0	Isocitrase OS=Brucella abortus biovar 1 (strain 9-941) OX=262698 GN=aceA PE=4 SV=1	aceA	0.1478	5.64045e-06
	Q57E10	TIR domain-containing protein OS=Brucella abortus biovar 1 (strain 9-941) OX=262698 GN=BruAb1_0752 PE=4 SV=1	BruAb1_0752	0.3434	0.0189134
	Q578Q9	Phosphogluconate dehydratase OS=Brucella abortus biovar 1 (strain 9-941) OX=262698 GN=edd PE=3 SV=1	edd	0.1805	0.00348907
	Q579G6	Aminotransferase, class III OS=Brucella abortus biovar 1 (strain 9-941) OX=262698 GN=BruAb2_0284 PE=4 SV=1	BruAb2_0284	0.5597	0.00342004
	F8WJT9	Erythritol transcriptional regulator OS=Brucella abortus biovar 1 (strain 9-941) OX=262698 GN=eryD PE=3 SV=1	eryD	0.5031	0.00431693
	Q57E07	MetC, cystathionine beta-lyase OS=Brucella abortus biovar 1 (strain 9-941) OX=262698 GN=metC PE=3 SV=1	metC	0.588	0.0011514
	Q57AC0	Flagellar transcriptional regulator FtcR OS=Brucella abortus biovar 1 (strain 9-941) OX=262698 GN=phoB PE=4 SV=1	phoB	0.0971	5.0127e-05
	Q577W6	Ribosomal protein S12 methylthiotransferase RimO OS=Brucella abortus biovar 1 (strain 9-941) OX=262698 GN=rimO PE=3 SV=1	rimO	0.1306	1.13082e-05
	Q57DS5	30S ribosomal protein S4 OS=Brucella abortus biovar 1 (strain 9-941) OX=262698 GN=rpsD PE=3 SV=1	rpsD	0.4135	7.72948e-06
	Q57CE8	Urease subunit alpha 2 OS=Brucella abortus biovar 1 (strain 9-941) OX=262698 GN=ureC2 PE=3 SV=1	ureC2	0.4446	0.00375233
	Q57CQ7	30S ribosomal protein S10 OS=Brucella abortus biovar 1 (strain 9-941) OX=262698 GN=rpsJ PE=3 SV=1	rpsJ	0.6639	0.00138594
	Q57CP5	50S ribosomal protein L1 OS=Brucella abortus biovar 1 (strain 9-941) OX=262698 GN=rplA PE=3 SV=1	rplA	0.4971	0.0011138
	Q57CS5	30S ribosomal protein S5 OS=Brucella abortus biovar 1 (strain 9-941) OX=262698 GN=rpsE PE=3 SV=1	rpsE	0.5413	0.000214549
	Q57E65	Cysteine--tRNA ligase OS=Brucella abortus biovar 1 (strain 9-941) OX=262698 GN=cysS PE=3 SV=1	cysS	0.6544	0.000771654
	P0C0Z3	50S ribosomal protein L16 OS=Brucella abortus biovar 1 (strain 9-941) OX=262698 GN=rplP PE=3 SV=1	rplP	0.3152	4.66077e-05
	Q57E41	UvrABC system protein C OS=Brucella abortus biovar 1 (strain 9-941) OX=262698 GN=uvrC PE=3 SV=1	uvrC	0.2839	0.000637589
	Q57AX5	2-oxoglutarate dehydrogenase E1 component OS=Brucella abortus biovar 1 (strain 9-941) OX=262698 GN=sucA PE=3 SV=1	sucA	0.6602	3.66754e-05
	Q57B45	GTPase Obg OS=Brucella abortus biovar 1 (strain 9-941) OX=262698 GN=obg PE=3 SV=1	obg	0.3891	0.00187445
	Q57D15	Lipoyl synthase OS=Brucella abortus biovar 1 (strain 9-941) OX=262698 GN=lipA PE=3 SV=1	lipA	0.4743	0.000292031
	Q57BH6	Crossover junction endodeoxyribonuclease RuvC OS=Brucella abortus biovar 1 (strain 9-941) OX=262698 GN=ruvC PE=3 SV=1	ruvC	0.1521	8.82814e-07
	Q57D38	Ribose 1,5-bisphosphate phosphokinase PhnN OS=Brucella abortus biovar 1 (strain 9-941) OX=262698 GN=phnN PE=3 SV=1	phnN	0.4213	0.00152741
	Q576P9	Uracil phosphoribosyltransferase OS=Brucella abortus biovar 1 (strain 9-941) OX=262698 GN=upp PE=3 SV=1	upp	0.6056	0.000670874
	Q57A98	tRNA pseudouridine synthase B OS=Brucella abortus biovar 1 (strain 9-941) OX=262698 GN=truB PE=3 SV=1	truB	0.4545	1.10385e-05
	Q57DR8	Phosphoribosylformylglycinamidine synthase subunit PurL OS=Brucella abortus biovar 1 (strain 9-941) OX=262698 GN=purL PE=3 SV=1	purL	0.4591	1.67966e-05
	Q57AE2	50S ribosomal protein L20 OS=Brucella abortus biovar 1 (strain 9-941) OX=262698 GN=rplT PE=3 SV=1	rplT	0.503	4.11694e-06
	Q57EW4	Polyprenyl synthetase family protein OS=Brucella abortus biovar 1 (strain 9-941) OX=262698 GN=BruAb1_0424 PE=3 SV=1	BruAb1_0424	0.5738	0.000785632
	Q57CT0	30S ribosomal protein S13 OS=Brucella abortus biovar 1 (strain 9-941) OX=262698 GN=rpsM PE=3 SV=1	rpsM	0.3585	6.4302e-06
	Q579M7	DNA mismatch repair protein MutL OS=Brucella abortus biovar 1 (strain 9-941) OX=262698 GN=mutL PE=3 SV=1	mutL	0.2225	0.000109999
	Q57CY1	Isoprenyl transferase OS=Brucella abortus biovar 1 (strain 9-941) OX=262698 GN=uppS PE=3 SV=1	uppS	0.2343	2.7364e-05
	Q57AA0	Translation initiation factor IF-2 OS=Brucella abortus biovar 1 (strain 9-941) OX=262698 GN=infB PE=3 SV=1	infB	0.6093	1.01459e-06
	Q57AZ0	3-isopropylmalate dehydratase large subunit OS=Brucella abortus biovar 1 (strain 9-941) OX=262698 GN=leuC PE=3 SV=1	leuC	0.061	1.72715e-05
	P0A3D8	Ferrochelatase OS=Brucella abortus biovar 1 (strain 9-941) OX=262698 GN=hemH PE=3 SV=2	hemH	0.6226	0.00219333
	Q578E4	Adenine deaminase OS=Brucella abortus biovar 1 (strain 9-941) OX=262698 GN=ade PE=3 SV=1	ade	0.5819	0.000909971
	Q577Y8	Octanoyltransferase OS=Brucella abortus biovar 1 (strain 9-941) OX=262698 GN=lipB PE=3 SV=1	lipB	0.1186	8.24982e-05
	Q576T0	Methionyl-tRNA formyltransferase OS=Brucella abortus biovar 1 (strain 9-941) OX=262698 GN=fmt PE=3 SV=1	fmt	0.625	0.00107418
	P0C119	L-erythrulose-1-phosphate isomerase OS=Brucella abortus biovar 1 (strain 9-941) OX=262698 GN=eryH PE=3 SV=1	eryH	0.6342	0.000481377
	Q57BJ0	Phosphoglucosamine mutase OS=Brucella abortus biovar 1 (strain 9-941) OX=262698 GN=glmM PE=3 SV=1	glmM	0.3473	0.000374558
	Q57D61	GTP cyclohydrolase 1 OS=Brucella abortus biovar 1 (strain 9-941) OX=262698 GN=folE PE=3 SV=1	folE	0.2601	3.99398e-06
	Q57AF0	Tryptophan synthase beta chain OS=Brucella abortus biovar 1 (strain 9-941) OX=262698 GN=trpB PE=3 SV=1	trpB	0.2279	3.59222e-05
	Q57AS5	UPF0178 protein BruAb1_1955 OS=Brucella abortus biovar 1 (strain 9-941) OX=262698 GN=BruAb1_1955 PE=3 SV=1	BruAb1_1955	0.6601	0.00903771
	Q57DM1	5'-nucleotidase SurE OS=Brucella abortus biovar 1 (strain 9-941) OX=262698 GN=surE PE=3 SV=1	surE	0.2923	0.000260734
	Q57ER3	30S ribosomal protein S18 OS=Brucella abortus biovar 1 (strain 9-941) OX=262698 GN=rpsR PE=3 SV=1	rpsR	0.3077	1.16584e-05
	Q57DW2	30S ribosomal protein S9 OS=Brucella abortus biovar 1 (strain 9-941) OX=262698 GN=rpsI PE=3 SV=1	rpsI	0.417	2.58067e-06
	Q57E58	Ribosomal RNA small subunit methyltransferase A OS=Brucella abortus biovar 1 (strain 9-941) OX=262698 GN=rsmA PE=3 SV=1	rsmA	0.5847	0.014588
	Q57B54	RNA pyrophosphohydrolase OS=Brucella abortus biovar 1 (strain 9-941) OX=262698 GN=rppH PE=3 SV=1	rppH	0.4421	0.00601686
	Q57CT1	30S ribosomal protein S11 OS=Brucella abortus biovar 1 (strain 9-941) OX=262698 GN=rpsK PE=3 SV=1	rpsK	0.1344	1.4856e-07
	Q57CS0	50S ribosomal protein L5 OS=Brucella abortus biovar 1 (strain 9-941) OX=262698 GN=rplE PE=3 SV=1	rplE	0.5788	9.72581e-06
	Q579P0	tRNA-specific adenosine deaminase OS=Brucella abortus biovar 1 (strain 9-941) OX=262698 GN=tadA PE=3 SV=1	tadA	0.4347	0.00812611
	Q57CJ2	CobN, cobN protein OS=Brucella abortus biovar 1 (strain 9-941) OX=262698 GN=cobN PE=4 SV=1	cobN	0.283	2.76858e-06
	Q57EM4	Chromosome partition protein Smc OS=Brucella abortus biovar 1 (strain 9-941) OX=262698 GN=smc PE=3 SV=1	smc	0.5717	0.00448599
	Q57C82	Cell division protein FtsQ OS=Brucella abortus biovar 1 (strain 9-941) OX=262698 GN=ftsQ PE=3 SV=1	ftsQ	0.1337	0.00032883
	Q57AR4	Gamma-glutamylcyclotransferase OS=Brucella abortus biovar 1 (strain 9-941) OX=262698 GN=BruAb1_1966 PE=3 SV=1	BruAb1_1966	0.3316	0.000507162
	Q57EN8	Processing protease OS=Brucella abortus biovar 1 (strain 9-941) OX=262698 GN=BruAb1_0505 PE=3 SV=1	BruAb1_0505	0.6335	0.0052735
	Q57AT0	7-carboxy-7-deazaguanine synthase OS=Brucella abortus biovar 1 (strain 9-941) OX=262698 GN=queE PE=3 SV=1	queE	0.2043	0.0389676
	Q57DC6	Beta tubulin(predicted) OS=Brucella abortus biovar 1 (strain 9-941) OX=262698 GN=BruAb1_1008 PE=3 SV=1	BruAb1_1008	0.4609	3.30453e-05
	Q57DT5	Glyoxalase family protein OS=Brucella abortus biovar 1 (strain 9-941) OX=262698 GN=BruAb1_0832 PE=3 SV=1	BruAb1_0832	0.1719	0.00557396
	Q57ER7	Replicative DNA helicase OS=Brucella abortus biovar 1 (strain 9-941) OX=262698 GN=dnaB PE=3 SV=1	dnaB	0.1576	5.33012e-06
	Q578D0	PcaJ, 3-oxoadipate CoA-transferase, beta subunit OS=Brucella abortus biovar 1 (strain 9-941) OX=262698 GN=pcaJ PE=3 SV=1	pcaJ	0.5265	0.00283117
	Q57CX0	ClpA, ATP-dependent Clp protease, ATP-binding subunit ClpA OS=Brucella abortus biovar 1 (strain 9-941) OX=262698 GN=clpA PE=3 SV=1	clpA	0.6521	1.73089e-05
	Q57A28	GltD, glutamate synthase, small subunit OS=Brucella abortus biovar 1 (strain 9-941) OX=262698 GN=gltD PE=4 SV=1	gltD	0.5514	0.00331504
	Q57BE3	DUF1013 domain-containing protein(predicted) OS=Brucella abortus biovar 1 (strain 9-941) OX=262698 GN=BruAb1_1722 PE=4 SV=1	BruAb1_1722	0.4959	0.000322732
	Q57AE7	M48 family metallopeptidase(predicted) OS=Brucella abortus biovar 1 (strain 9-941) OX=262698 GN=BruAb1_2088 PE=4 SV=1	BruAb1_2088	0.3009	0.0310492
	Q577S7	2-oxoisovalerate dehydrogenase subunit alpha OS=Brucella abortus biovar 1 (strain 9-941) OX=262698 GN=BruAb2_0700 PE=3 SV=1	BruAb2_0700	0.0856	9.14497e-05
	Q57EJ1	ManA, mannose-6-phosphate isomerase OS=Brucella abortus biovar 1 (strain 9-941) OX=262698 GN=manA PE=3 SV=1	manA	0.1031	2.0399e-06
	P0DN85	Protein RecA OS=Brucella abortus biovar 1 (strain 9-941) OX=262698 GN=recA PE=3 SV=1	recA	0.4177	0.000449183
	Q577B0	Parvulin-like PPIase OS=Brucella abortus biovar 1 (strain 9-941) OX=262698 GN=BruAb2_0886 PE=3 SV=1	BruAb2_0886	0.0513	5.82515e-05
	Q579U5	Hydroxypyruvate isomerase, hypothetical OS=Brucella abortus biovar 1 (strain 9-941) OX=262698 GN=BruAb2_0143 PE=3 SV=1	BruAb2_0143	0.1786	0.000308334
	Q57AG4	PtsH, phosphocarrier protein HPr OS=Brucella abortus biovar 1 (strain 9-941) OX=262698 GN=ptsH PE=4 SV=1	ptsH	0.4428	0.0154456
	Q579P6	Hydrolase, haloacid dehalogenase-like family OS=Brucella abortus biovar 1 (strain 9-941) OX=262698 GN=BruAb2_0194 PE=4 SV=1	BruAb2_0194	0.571	0.00120478
	Q57BA8	50S ribosomal protein L32 OS=Brucella abortus biovar 1 (strain 9-941) OX=262698 GN=rpmF PE=3 SV=1	rpmF	0.3777	0.0183453
	Q57AJ6	tRNA modification GTPase MnmE OS=Brucella abortus biovar 1 (strain 9-941) OX=262698 GN=mnmE PE=3 SV=1	mnmE	0.362	0.00227503
	Q57CR3	50S ribosomal protein L22 OS=Brucella abortus biovar 1 (strain 9-941) OX=262698 GN=rplV PE=3 SV=1	rplV	0.655	0.0109691
	Q57CS3	50S ribosomal protein L6 OS=Brucella abortus biovar 1 (strain 9-941) OX=262698 GN=rplF PE=3 SV=1	rplF	0.5636	0.00109911
	Q57EW2	Glycine--tRNA ligase alpha subunit OS=Brucella abortus biovar 1 (strain 9-941) OX=262698 GN=glyQ PE=3 SV=1	glyQ	0.5193	0.00269828
	Q579M5	Acyl-CoA dehydrogenase OS=Brucella abortus biovar 1 (strain 9-941) OX=262698 GN=BruAb2_0216 PE=3 SV=1	BruAb2_0216	0.5611	0.00039975
	Q57CF0	Urease subunit gamma 2 OS=Brucella abortus biovar 1 (strain 9-941) OX=262698 GN=ureA2 PE=3 SV=1	ureA2	0.481	0.00961367
	Q57AF2	Tryptophan synthase alpha chain OS=Brucella abortus biovar 1 (strain 9-941) OX=262698 GN=trpA PE=3 SV=1	trpA	0.2137	0.00010333
	P0C0Z5	30S ribosomal protein S15 OS=Brucella abortus biovar 1 (strain 9-941) OX=262698 GN=rpsO PE=3 SV=1	rpsO	0.5382	0.011201
	Q57CP9	DNA-directed RNA polymerase subunit beta' OS=Brucella abortus biovar 1 (strain 9-941) OX=262698 GN=rpoC PE=3 SV=1	rpoC	0.573	6.62589e-05
	Q57EN9	Acetyltransferase, GNAT family OS=Brucella abortus biovar 1 (strain 9-941) OX=262698 GN=BruAb1_0504 PE=4 SV=1	BruAb1_0504	0.3003	0.000274716
	Q578P5	Transcriptional regulator, LysR family OS=Brucella abortus biovar 1 (strain 9-941) OX=262698 GN=BruAb2_0467 PE=3 SV=1	BruAb2_0467	0.4893	5.45306e-06
	Q57B49	Ribosomal silencing factor RsfS OS=Brucella abortus biovar 1 (strain 9-941) OX=262698 GN=rsfS PE=3 SV=1	rsfS	0.582	0.00125173
	Q57DM6	Segregation and condensation protein B(predicted) OS=Brucella abortus biovar 1 (strain 9-941) OX=262698 GN=BruAb1_0893 PE=4 SV=1	BruAb1_0893	0.6194	0.00315631
	Q57FS8	Aconitate hydratase OS=Brucella abortus biovar 1 (strain 9-941) OX=262698 GN=acnA PE=3 SV=1	acnA	0.5919	0.000155101
	Q57DB6	Phospho-2-dehydro-3-deoxyheptonate aldolase OS=Brucella abortus biovar 1 (strain 9-941) OX=262698 GN=dhs PE=3 SV=1	dhs	0.2524	1.20976e-05
	Q57AM5	Acetyl-coenzyme A carboxylase carboxyl transferase subunit alpha OS=Brucella abortus biovar 1 (strain 9-941) OX=262698 GN=accA PE=3 SV=1	accA	0.4994	0.000154353
	Q57EK4	Perosamine synthase, hypothetical OS=Brucella abortus biovar 1 (strain 9-941) OX=262698 GN=BruAb1_0544 PE=3 SV=1	BruAb1_0544	0.3113	0.00049175
CytoplasmicMembrane	Q2YLK2	Lytic murein transglycosylase, putative OS=Brucella abortus (strain 2308) OX=359391 GN=BAB1_1836 PE=4 SV=1	BAB1_1836	0.016	1.90606e-08
	Q2YQI8	Thromboxane receptor:General substrate transporter:Major facilitator superfamily (MFS) OS=Brucella abortus (strain 2308) OX=359391 GN=BAB1_1692 PE=4 SV=1	BAB1_1692	0.2274	0.000204286
	Q2YJS6	ATP/GTP-binding site motif A (P-loop):ABC transporter:AAA ATPase OS=Brucella abortus (strain 2308) OX=359391 GN=BAB2_0970 PE=3 SV=1	BAB2_0970	0.3602	0.0231426
	Q2YP78	ATP/GTP-binding site motif A (P-loop):ABC transporter:AAA ATPase OS=Brucella abortus (strain 2308) OX=359391 GN=BAB1_0224 PE=3 SV=1	BAB1_0224	0.205	0.000717257
	Q2YKT7	ATP/GTP-binding site motif A (P-loop):ABC transporter:AAA ATPase OS=Brucella abortus (strain 2308) OX=359391 GN=BAB2_0561 PE=3 SV=1	BAB2_0561	0.545	0.000476872
	Q2YPQ4	Cytochrome c heme-binding site:Cytochrome c, class IA/ IB:Cytochrome c, class I:Cytochrome c, class IC OS=Brucella abortus (strain 2308) OX=359391 GN=BAB1_0036 PE=4 SV=1	BAB1_0036	0.5304	0.000319327
	Q2YM86	4Fe-4S ferredoxin, iron-sulfur binding domain OS=Brucella abortus (strain 2308) OX=359391 GN=BAB1_0388 PE=4 SV=1	BAB1_0388	0.208	0.000191861
	Q2YR75	Mercuric reductase:Phospholipid/glycerol acyltransferase OS=Brucella abortus (strain 2308) OX=359391 GN=BAB1_1994 PE=4 SV=1	BAB1_1994	0.0872	0.000350545
	Q2YNU5	Uncharacterized protein OS=Brucella abortus (strain 2308) OX=359391 GN=BAB1_0084 PE=3 SV=1	BAB1_0084	0.1666	0.000473749
	Q2YLF5	Bacterial inner-membrane translocator OS=Brucella abortus (strain 2308) OX=359391 GN=BAB1_1798 PE=4 SV=1	BAB1_1798	0.3932	0.00034115
	Q2YKR6	sn-glycerol-3-phosphate transport system permease protein UgpA OS=Brucella abortus (strain 2308) OX=359391 GN=ugpA PE=3 SV=1	ugpA	0.3711	1.78288e-05
	Q2YRG6	Secretion protein HlyD OS=Brucella abortus (strain 2308) OX=359391 GN=BAB1_1685 PE=3 SV=1	BAB1_1685	0.0333	0.0146016
	Q2YII3	Uncharacterized protein OS=Brucella abortus (strain 2308) OX=359391 GN=glcF PE=4 SV=1	glcF	0.0632	0.000293024
	Q2YQX6	Histidine kinase OS=Brucella abortus (strain 2308) OX=359391 GN=BAB1_2101 PE=4 SV=1	BAB1_2101	0.3481	1.06792e-05
	Q2YJY3	Cytochrome c heme-binding site:4Fe-4S ferredoxin, iron-sulfur binding domain:Nitrate reductase, beta subunit OS=Brucella abortus (strain 2308) OX=359391 GN=narH PE=4 SV=1	narH	0.5653	8.26482e-06
	Q2YKU7	ATP/GTP-binding site motif A (P-loop):ABC transporter:AAA ATPase OS=Brucella abortus (strain 2308) OX=359391 GN=BAB2_0551 PE=3 SV=1	BAB2_0551	0.0965	3.88671e-05
	Q2YPZ0	HlyD_D23 domain-containing protein OS=Brucella abortus (strain 2308) OX=359391 GN=BAB1_1113 PE=3 SV=1	BAB1_1113	0.0708	2.05447e-08
	Q2YQA2	Spermidine/putrescine import ATP-binding protein PotA OS=Brucella abortus (strain 2308) OX=359391 GN=potA PE=3 SV=1	potA	0.3787	0.000313916
	Q2YML1	PAS domain:GGDEF:PAS-associated C-terminal domain:PAC motif:EAL domain OS=Brucella abortus (strain 2308) OX=359391 GN=BAB1_0507 PE=4 SV=1	BAB1_0507	0.2072	2.70512e-05
	Q2YIU1	Acriflavin resistance protein OS=Brucella abortus (strain 2308) OX=359391 GN=BAB2_0321 PE=4 SV=1	BAB2_0321	0.4256	3.70116e-05
	Q2YKA0	Gram-negative bacterial RTX secretion protein D:Secretion protein HlyD OS=Brucella abortus (strain 2308) OX=359391 GN=BAB2_0764 PE=3 SV=1	BAB2_0764	0.0162	0.00234729
	Q2YJU4	Lipase OS=Brucella abortus (strain 2308) OX=359391 GN=BAB2_0947 PE=4 SV=1	BAB2_0947	0.3518	0.00137738
	Q2YLH3	Protease HtpX homolog OS=Brucella abortus (strain 2308) OX=359391 GN=htpX PE=3 SV=1	htpX	0.5452	0.00625287
	Q2YR84	Uncharacterized protein OS=Brucella abortus (strain 2308) OX=359391 GN=BAB1_1985 PE=4 SV=1	BAB1_1985	0.38	0.000558993
	Q2YIJ8	Glucose/galactose transporter OS=Brucella abortus (strain 2308) OX=359391 GN=gluP PE=3 SV=1	gluP	0.1992	0.00490589
	Q2YJP8	Elongation factor 4 OS=Brucella abortus (strain 2308) OX=359391 GN=lepA PE=3 SV=1	lepA	0.4609	3.31368e-05
	Q2YMU7	Cytochrome c-type biogenesis protein CcmE OS=Brucella abortus (strain 2308) OX=359391 GN=ccmE PE=3 SV=1	ccmE	0.4254	0.000166428
	Q2YNB0	Heme A synthase OS=Brucella abortus (strain 2308) OX=359391 GN=ctaA PE=3 SV=1	ctaA	0.2935	0.0021424
	Q2YKR7	sn-glycerol-3-phosphate transport system permease protein UgpE OS=Brucella abortus (strain 2308) OX=359391 GN=ugpE PE=3 SV=1	ugpE	0.646	0.00430683
	Q2YKF9	Binding-protein-dependent transport systems inner membrane component:Sodium:dicarboxylate symporter OS=Brucella abortus (strain 2308) OX=359391 GN=BAB2_0701 PE=3 SV=1	BAB2_0701	0.423	0.00735439
	Q2YPC8	Acriflavin resistance protein OS=Brucella abortus (strain 2308) OX=359391 GN=BAB1_0307 PE=4 SV=1	BAB1_0307	0.1162	2.00279e-06
	Q2YKD5	Beta and gamma crystallin:Cytochrome bd ubiquinol oxidase, subunit II OS=Brucella abortus (strain 2308) OX=359391 GN=cydB PE=3 SV=1	cydB	0.2612	0.0259321
	Q2YQC8	Gram-negative bacterial RTX secretion protein D:Secretion protein HlyD OS=Brucella abortus (strain 2308) OX=359391 GN=BAB1_1371 PE=4 SV=1	BAB1_1371	0.03	4.14574e-06
	Q2YS02	Uncharacterized protein OS=Brucella abortus (strain 2308) OX=359391 GN=BAB1_1576 PE=4 SV=1	BAB1_1576	0.305	0.000239992
	Q2YR35	D-alanyl-D-alanine carboxypeptidase 1, S11 family OS=Brucella abortus (strain 2308) OX=359391 GN=BAB1_2037 PE=3 SV=1	BAB1_2037	0.0082	3.45903e-05
	Q2YJT6	Cytochrome c heme-binding site OS=Brucella abortus (strain 2308) OX=359391 GN=BAB2_0955 PE=4 SV=1	BAB2_0955	0.1046	0.000485146
	Q2YPZ1	Acriflavin resistance protein OS=Brucella abortus (strain 2308) OX=359391 GN=BAB1_1112 PE=4 SV=1	BAB1_1112	0.5478	0.00135451
	Q2YRW9	Membrane protein, putative OS=Brucella abortus (strain 2308) OX=359391 GN=BAB1_1200 PE=4 SV=1	BAB1_1200	0.3604	0.000252582
	Q2YLQ1	Succinate dehydrogenase flavoprotein subunit OS=Brucella abortus (strain 2308) OX=359391 GN=BAB1_1901 PE=3 SV=1	BAB1_1901	0.5629	0.000113833
	Q2YRI0	HNH endonuclease:HNH nuclease OS=Brucella abortus (strain 2308) OX=359391 GN=BAB1_1658 PE=4 SV=1	BAB1_1658	0.4561	0.00122205
	Q2YKF1	ATP/GTP-binding site motif A (P-loop):Cell divisionFtsK/SpoIIIE protein:Proline-rich extensin:AAA ATPase OS=Brucella abortus (strain 2308) OX=359391 GN=BAB2_0709 PE=3 SV=1	BAB2_0709	0.4931	0.000788169
	Q2YIR4	ATP/GTP-binding site motif A (P-loop):ABC transporter:AAA ATPase OS=Brucella abortus (strain 2308) OX=359391 GN=BAB2_0008 PE=4 SV=1	BAB2_0008	0.2629	0.0293999
	Q2YQT9	Phosphate transport system permease protein PstA OS=Brucella abortus (strain 2308) OX=359391 GN=BAB1_2143 PE=3 SV=1	BAB1_2143	0.3829	0.0111893
	Q2YK84	Tetracycline resistance protein OS=Brucella abortus (strain 2308) OX=359391 GN=BAB2_0781 PE=4 SV=1	BAB2_0781	0.2838	0.000481353
	Q2YIY4	ATP/GTP-binding site motif A (P-loop):ABC transporter:AAA ATPase:Phosphoribulokinase OS=Brucella abortus (strain 2308) OX=359391 GN=rbsA-3 PE=3 SV=1	rbsA-3	0.1767	1.60925e-06
	Q2YNY5	Penicillin-insensitive transglycosylase OS=Brucella abortus (strain 2308) OX=359391 GN=BAB1_0114 PE=3 SV=1	BAB1_0114	0.2283	3.88711e-05
	Q2YKD2	ABC transporter, transmembrane region:ATP/GTP-binding site motif A (P-loop):ABC transporter:AAA ATPase OS=Brucella abortus (strain 2308) OX=359391 GN=BAB2_0730 PE=4 SV=1	BAB2_0730	0.1099	0.00132432
	Q57EN4	Cyclic-guanylate-specific phosphodiesterase OS=Brucella abortus biovar 1 (strain 9-941) OX=262698 GN=BruAb1_0509 PE=4 SV=1	BruAb1_0509	0.3534	0.00973666
	Q57AZ5	Succinate dehydrogenase iron-sulfur subunit OS=Brucella abortus biovar 1 (strain 9-941) OX=262698 GN=sdhB PE=3 SV=1	sdhB	0.5018	0.000312627
	Q578N4	Iron compound ABC transporter, ATP-binding protein OS=Brucella abortus biovar 1 (strain 9-941) OX=262698 GN=BruAb2_0478 PE=4 SV=1	BruAb2_0478	0.0914	0.000211192
	Q578Z6	50S ribosomal subunit assembly factor BipA OS=Brucella abortus biovar 1 (strain 9-941) OX=262698 GN=bipA PE=3 SV=1	bipA	0.4545	0.000376435
	Q57DU0	NADH:ubiquinone reductase (H(+)-translocating) OS=Brucella abortus biovar 1 (strain 9-941) OX=262698 GN=nuoL PE=3 SV=1	nuoL	0.2426	9.59708e-05
	Q57AJ9	ParA, chromosome partitioning protein OS=Brucella abortus biovar 1 (strain 9-941) OX=262698 GN=parA PE=4 SV=1	parA	0.5638	0.0199925
	Q579N5	Hypothetical lutathione-regulated potassium-efflux system protein OS=Brucella abortus biovar 1 (strain 9-941) OX=262698 GN=BruAb2_0206 PE=3 SV=1	BruAb2_0206	0.2679	2.87308e-06
	Q57C77	Cell wall polymerase OS=Brucella abortus biovar 1 (strain 9-941) OX=262698 GN=ftsW PE=4 SV=1	ftsW	0.2679	0.000647021
	Q57F79	Transporter, hypothetical OS=Brucella abortus biovar 1 (strain 9-941) OX=262698 GN=BruAb1_0302 PE=3 SV=1	BruAb1_0302	0.5292	0.000960343
	Q57C72	Penicillin-binding protein OS=Brucella abortus biovar 1 (strain 9-941) OX=262698 GN=BruAb1_1432 PE=4 SV=1	BruAb1_1432	0.2651	0.00400603
	Q576U4	DUF4105 domain-containing protein OS=Brucella abortus biovar 1 (strain 9-941) OX=262698 GN=BruAb2_0958 PE=4 SV=1	BruAb2_0958	0.1266	9.75705e-05
	Q576V1	Peptide ABC transporter, permease protein OS=Brucella abortus biovar 1 (strain 9-941) OX=262698 GN=BruAb2_0951 PE=3 SV=1	BruAb2_0951	0.3186	0.00118865
	Q57EC5	Hypothetical membrane protein OS=Brucella abortus biovar 1 (strain 9-941) OX=262698 GN=BruAb1_0634 PE=3 SV=1	BruAb1_0634	0.3562	0.000413946
	Q57EF8	Histidine kinase OS=Brucella abortus biovar 1 (strain 9-941) OX=262698 GN=BruAb1_0598 PE=4 SV=1	BruAb1_0598	0.2268	6.40641e-05
	Q577B4	NarG, respiratory nitrate reductase, alpha subunit OS=Brucella abortus biovar 1 (strain 9-941) OX=262698 GN=narG PE=3 SV=1	narG	0.4531	8.33454e-06
	Q57F03	Nitrogen fixation protein FixI, hypothetical OS=Brucella abortus biovar 1 (strain 9-941) OX=262698 GN=BruAb1_0383 PE=3 SV=1	BruAb1_0383	0.2785	1.20734e-06
	Q57B53	Carboxyl-terminal protease OS=Brucella abortus biovar 1 (strain 9-941) OX=262698 GN=BruAb1_1816 PE=3 SV=1	BruAb1_1816	0.4479	3.64331e-08
	Q57FY3	Hypothetical transglycosylase OS=Brucella abortus biovar 1 (strain 9-941) OX=262698 GN=BruAb1_0031 PE=4 SV=1	BruAb1_0031	0.0237	0.000144829
	Q2YM82	Cytochrome-c oxidase OS=Brucella abortus (strain 2308) OX=359391 GN=ccoN PE=3 SV=1	ccoN	0.5094	0.00258333
	Q57C61	Hypothetical transglycolase OS=Brucella abortus biovar 1 (strain 9-941) OX=262698 GN=BruAb1_1443 PE=4 SV=1	BruAb1_1443	0.4879	0.00855008
	Q57CA1	Alpha-isopropylmalate/homocitrate synthase(predicted) OS=Brucella abortus biovar 1 (strain 9-941) OX=262698 GN=BruAb1_1403 PE=4 SV=1	BruAb1_1403	0.4091	0.00129822
	Q57A13	Hypothetical transglycosylase OS=Brucella abortus biovar 1 (strain 9-941) OX=262698 GN=BruAb2_0070 PE=4 SV=1	BruAb2_0070	0.2824	2.38555e-05
	Q579D4	HlyD family secretion protein OS=Brucella abortus biovar 1 (strain 9-941) OX=262698 GN=BruAb2_0317 PE=3 SV=1	BruAb2_0317	0.3696	2.26075e-05
	Q57AA8	CBS domain protein OS=Brucella abortus biovar 1 (strain 9-941) OX=262698 GN=BruAb1_2130 PE=3 SV=1	BruAb1_2130	0.5751	0.000916428
	Q57DV0	NADH-quinone oxidoreductase subunit B OS=Brucella abortus biovar 1 (strain 9-941) OX=262698 GN=nuoB PE=3 SV=1	nuoB	0.2516	2.2732e-07
	Q578K3	Fe(3+) ions import ATP-binding protein FbpC OS=Brucella abortus biovar 1 (strain 9-941) OX=262698 GN=fbpC PE=3 SV=1	fbpC	0.66	0.0146656
	Q57DU4	NADH-quinone oxidoreductase subunit H OS=Brucella abortus biovar 1 (strain 9-941) OX=262698 GN=nuoH PE=3 SV=1	nuoH	0.5491	0.000113463
	Q577E6	HlyD family secretion protein OS=Brucella abortus biovar 1 (strain 9-941) OX=262698 GN=BruAb2_0846 PE=3 SV=1	BruAb2_0846	0.0185	0.000512456
	Q57G03	ABC transporter, permease protein OS=Brucella abortus biovar 1 (strain 9-941) OX=262698 GN=BruAb1_0008 PE=3 SV=1	BruAb1_0008	0.4009	0.0010676
	Q57E04	Amino acid ABC transporter, ATP-binding protein OS=Brucella abortus biovar 1 (strain 9-941) OX=262698 GN=BruAb1_0762 PE=3 SV=1	BruAb1_0762	0.4026	0.018547
	Q576V3	Peptide ABC transporter, ATP-binding protein OS=Brucella abortus biovar 1 (strain 9-941) OX=262698 GN=BruAb2_0949 PE=3 SV=1	BruAb2_0949	0.4463	8.51813e-05
	Q57DX0	Bacterial sugar transferase OS=Brucella abortus biovar 1 (strain 9-941) OX=262698 GN=BruAb1_0796 PE=3 SV=1	BruAb1_0796	0.0533	0.00794182
	Q57EY0	ATP synthase subunit a OS=Brucella abortus biovar 1 (strain 9-941) OX=262698 GN=atpB PE=3 SV=1	atpB	0.5338	0.00258418
	Q57EF2	Penicillin-insensitive transglycosylase OS=Brucella abortus biovar 1 (strain 9-941) OX=262698 GN=BruAb1_0604 PE=3 SV=1	BruAb1_0604	0.258	3.00618e-05
	Q57DJ4	DD-transpeptidase OS=Brucella abortus biovar 1 (strain 9-941) OX=262698 GN=BruAb1_0926 PE=3 SV=1	BruAb1_0926	0.6355	0.00220429
	Q577M4	HlyD family secretion protein OS=Brucella abortus biovar 1 (strain 9-941) OX=262698 GN=BruAb2_0759 PE=4 SV=1	BruAb2_0759	0.1241	3.87167e-05
	Q57BD6	N5-carboxyaminoimidazole ribonucleotide synthase OS=Brucella abortus biovar 1 (strain 9-941) OX=262698 GN=purK PE=3 SV=1	purK	0.2543	0.000446888
	Q57FG0	Copper-translocating P-type ATPase OS=Brucella abortus biovar 1 (strain 9-941) OX=262698 GN=BruAb1_0215 PE=3 SV=1	BruAb1_0215	0.3144	3.40142e-06
	Q57BN4	Hypothetical disulfide bond formation protein B OS=Brucella abortus biovar 1 (strain 9-941) OX=262698 GN=BruAb1_1630 PE=4 SV=1	BruAb1_1630	0.4714	0.00736075
	Q2YQ73	Beta-(1-->2)glucan export ATP-binding/permease protein NdvA OS=Brucella abortus (strain 2308) OX=359391 GN=ndvA PE=1 SV=1	ndvA	0.3698	0.00652146
	Q57DU2	NADH-quinone oxidoreductase subunit J OS=Brucella abortus biovar 1 (strain 9-941) OX=262698 GN=nuoJ PE=3 SV=1	nuoJ	0.6087	0.0331087
	Q57BP4	RbsA-2, ribose ABC transporter, ATP-binding protein OS=Brucella abortus biovar 1 (strain 9-941) OX=262698 GN=rbsA-2 PE=3 SV=1	rbsA-2	0.4036	2.2567e-05
	Q577R5	ABC transporter, ATP-binding/permease protein OS=Brucella abortus biovar 1 (strain 9-941) OX=262698 GN=BruAb2_0713 PE=3 SV=1	BruAb2_0713	0.1162	2.91785e-05
	Q57BX5	Cytochrome b OS=Brucella abortus biovar 1 (strain 9-941) OX=262698 GN=petB PE=3 SV=1	petB	0.5858	1.07925e-05
Periplasmic	Q2YJU9	FGE-sulfatase domain-containing protein OS=Brucella abortus (strain 2308) OX=359391 GN=BAB2_0942 PE=4 SV=1	BAB2_0942	0.2913	0.000961583
	Q2YJP1	Peptidase family U6, penicillin-insensitive murein endopeptidase OS=Brucella abortus (strain 2308) OX=359391 GN=mepA PE=4 SV=1	mepA	0.0856	0.000131778
	Q2YNN6	N-acetylmuramoyl-L-alanine amidase OS=Brucella abortus (strain 2308) OX=359391 GN=BAB1_0931 PE=4 SV=1	BAB1_0931	0.1039	7.71081e-07
	Q2YNU8	Lipolytic enzyme, G-D-S-L family OS=Brucella abortus (strain 2308) OX=359391 GN=BAB1_0081 PE=4 SV=1	BAB1_0081	0.0591	3.67501e-05
	Q2YQB8	Periplasmic binding protein/LacI transcriptional regulator OS=Brucella abortus (strain 2308) OX=359391 GN=BAB1_1648 PE=4 SV=1	BAB1_1648	0.0511	7.5768e-06
	Q2YLW5	Solute-binding protein/glutamate receptor:Bacterial extracellular solute-binding protein, family 3 OS=Brucella abortus (strain 2308) OX=359391 GN=BAB1_1954 PE=4 SV=1	BAB1_1954	0.6028	0.00800915
	Q2YPL7	Bacterial extracellular solute-binding protein, family 5 OS=Brucella abortus (strain 2308) OX=359391 GN=BAB1_0009 PE=3 SV=1	BAB1_0009	0.4533	0.00187545
	Q2YKU0	Solute-binding protein/glutamate receptor:Bacterial extracellular solute-binding protein, family 3 OS=Brucella abortus (strain 2308) OX=359391 GN=fliY PE=4 SV=1	fliY	0.0143	1.66127e-05
	Q2YJ91	Oxidoreductase, N-terminal OS=Brucella abortus (strain 2308) OX=359391 GN=BAB2_0107 PE=4 SV=1	BAB2_0107	0.6549	0.0147588
	Q576D4	Leu/Ile/Val-binding protein homolog 5 OS=Brucella abortus biovar 1 (strain 9-941) OX=262698 GN=BruAb2_1129 PE=3 SV=1	BruAb2_1129	0.1921	2.14143e-06
	Q2YJW3	Parallel beta-helix repeat:Carbohydrate binding and sugar hydrolysis:Periplasmic copper-binding OS=Brucella abortus (strain 2308) OX=359391 GN=nosD PE=4 SV=1	nosD	0.133	8.878e-06
	Q2YL39	Bacterial extracellular solute-binding protein, family 5 OS=Brucella abortus (strain 2308) OX=359391 GN=BAB2_0451 PE=3 SV=1	BAB2_0451	0.1018	6.24508e-05
Unknown	Q2YIF2	Antifreeze protein, type I OS=Brucella abortus (strain 2308) OX=359391 GN=BAB2_0047 PE=4 SV=1	BAB2_0047	0.0623	3.7605e-05
	Q2YNP0	DSBA oxidoreductase OS=Brucella abortus (strain 2308) OX=359391 GN=BAB1_0927 PE=4 SV=1	BAB1_0927	0.1061	9.81315e-06
	Q2YJ87	Glutamate synthase amidotransferase domain:Glutamate synthase central domain OS=Brucella abortus (strain 2308) OX=359391 GN=gltB PE=3 SV=1	gltB	0.5045	1.51426e-05
	Q2YN49	Peptidyl-prolyl cis-trans isomerase, putative OS=Brucella abortus (strain 2308) OX=359391 GN=BAB1_0706 PE=4 SV=1	BAB1_0706	0.2009	1.18129e-05
	Q2YN97	Putative peptidoglycan binding domain 1:Twin-arginine translocation pathway signal OS=Brucella abortus (strain 2308) OX=359391 GN=BAB1_0785 PE=3 SV=1	BAB1_0785	0.09	1.94278e-05
	Q2YJ59	PepSY domain-containing protein OS=Brucella abortus (strain 2308) OX=359391 GN=BAB2_0223 PE=4 SV=1	BAB2_0223	0.6645	0.00764944
	Q2YPG7	HTH araC/xylS-type domain-containing protein OS=Brucella abortus (strain 2308) OX=359391 GN=BAB1_0337 PE=4 SV=1	BAB1_0337	0.6194	0.0023481
	Q2YRY6	TPR repeat OS=Brucella abortus (strain 2308) OX=359391 GN=BAB1_1760 PE=4 SV=1	BAB1_1760	0.4216	0.00010829
	Q2YQ61	DUF2059 domain-containing protein OS=Brucella abortus (strain 2308) OX=359391 GN=BAB1_1029 PE=4 SV=1	BAB1_1029	0.4726	2.34812e-05
	Q2YKR9	Cytidine/deoxycytidylate deaminase, zinc-binding region OS=Brucella abortus (strain 2308) OX=359391 GN=BAB2_0579 PE=4 SV=1	BAB2_0579	0.0549	1.9186e-06
	Q2YP27	Uncharacterized protein OS=Brucella abortus (strain 2308) OX=359391 GN=BAB1_0180 PE=4 SV=1	BAB1_0180	0.218	0.000863115
	Q2YMU8	TPR repeat OS=Brucella abortus (strain 2308) OX=359391 GN=BAB1_0631 PE=4 SV=1	BAB1_0631	0.271	6.28234e-05
	Q2YN30	Uncharacterized protein OS=Brucella abortus (strain 2308) OX=359391 GN=BAB1_0689 PE=4 SV=1	BAB1_0689	0.0102	0.00222114
	Q2YL07	Periplasmic binding protein OS=Brucella abortus (strain 2308) OX=359391 GN=BAB2_0483 PE=4 SV=1	BAB2_0483	0.0517	0.00137326
	Q2YKV3	Uncharacterized protein OS=Brucella abortus (strain 2308) OX=359391 GN=BAB2_0543 PE=4 SV=1	BAB2_0543	0.0136	3.73092e-06
	Q2YNS5	Heavy metal transport/detoxification protein:Heavy metal binding OS=Brucella abortus (strain 2308) OX=359391 GN=BAB1_0960 PE=4 SV=1	BAB1_0960	0.5852	0.00297139
	Q57A90	SH3b domain-containing protein OS=Brucella abortus biovar 1 (strain 9-941) OX=262698 GN=BruAb1_2149 PE=4 SV=1	BruAb1_2149	0.2303	3.79204e-05
	Q2YM38	Glycoside hydrolase, family 25 OS=Brucella abortus (strain 2308) OX=359391 GN=BAB1_1465 PE=3 SV=1	BAB1_1465	0.091	9.74989e-05
	Q57BR7	Glycosyl transferase, family 25 OS=Brucella abortus biovar 1 (strain 9-941) OX=262698 GN=BruAb1_1592 PE=4 SV=1	BruAb1_1592	0.2161	0.000945686
	Q2YL17	Conserved domain protein OS=Brucella abortus (strain 2308) OX=359391 GN=BAB2_0473 PE=4 SV=1	BAB2_0473	0.0585	1.10425e-05
	Q57CS8	Protein translocase subunit SecY OS=Brucella abortus biovar 1 (strain 9-941) OX=262698 GN=secY PE=3 SV=1	secY	0.6417	0.00269144
	Q57DD7	Serine-type D-Ala-D-Ala carboxypeptidase OS=Brucella abortus biovar 1 (strain 9-941) OX=262698 GN=BruAb1_0997 PE=3 SV=1	BruAb1_0997	0.2761	5.49265e-05
	Q57FR5	DUF218 domain-containing protein OS=Brucella abortus biovar 1 (strain 9-941) OX=262698 GN=BruAb1_0103 PE=4 SV=1	BruAb1_0103	0.0198	0.000475567
	Q57BU7	Hypothetical transporter OS=Brucella abortus biovar 1 (strain 9-941) OX=262698 GN=BruAb1_1561 PE=4 SV=1	BruAb1_1561	0.2515	8.22357e-05
	Q578G2	Aldehyde dehydrogenase family protein OS=Brucella abortus biovar 1 (strain 9-941) OX=262698 GN=BruAb2_0555 PE=3 SV=1	BruAb2_0555	0.373	0.000186972
	Q57AB8	Lipoprotein, hypothetical OS=Brucella abortus biovar 1 (strain 9-941) OX=262698 GN=BruAb1_2120 PE=4 SV=1	BruAb1_2120	0.0222	9.51616e-05
	Q57D87	Vitamin B12-dependent ribonucleotide reductase OS=Brucella abortus biovar 1 (strain 9-941) OX=262698 GN=BruAb1_1048 PE=3 SV=1	BruAb1_1048	0.2607	3.13299e-06
	Q57EB4	Glutathione S-transferase family protein OS=Brucella abortus biovar 1 (strain 9-941) OX=262698 GN=BruAb1_0645 PE=3 SV=1	BruAb1_0645	0.1941	6.82196e-05
	Q577H1	UPF0423 protein BruAb2_0820 OS=Brucella abortus biovar 1 (strain 9-941) OX=262698 GN=BruAb2_0820 PE=3 SV=1	BruAb2_0820	0.5161	0.00251949
	Q57CS6	50S ribosomal protein L30 OS=Brucella abortus biovar 1 (strain 9-941) OX=262698 GN=rpmD PE=3 SV=1	rpmD	0.1748	1.42841e-05
	Q577P8	Biotin synthase OS=Brucella abortus biovar 1 (strain 9-941) OX=262698 GN=bioB PE=3 SV=2	bioB	0.099	9.89224e-05
	Q57EW9	4-diphosphocytidyl-2-C-methyl-D-erythritol kinase OS=Brucella abortus biovar 1 (strain 9-941) OX=262698 GN=ispE PE=3 SV=1	ispE	0.4095	1.5546e-05
	Q2YN55	Proline-rich region:Proline-rich extensin OS=Brucella abortus (strain 2308) OX=359391 GN=BAB1_0735 PE=4 SV=1	BAB1_0735	0.0276	1.0768e-05
	Q2YRJ0	ATP/GTP-binding site motif A (P-loop) OS=Brucella abortus (strain 2308) OX=359391 GN=BAB1_1186 PE=4 SV=1	BAB1_1186	0.539	0.00046254
	Q2YKN6	Endonuclease V OS=Brucella abortus (strain 2308) OX=359391 GN=BAB2_0621 PE=4 SV=1	BAB2_0621	0.422	0.00110133
	Q2YNQ7	Esterase/lipase/thioesterase, active site OS=Brucella abortus (strain 2308) OX=359391 GN=BAB1_0946 PE=4 SV=1	BAB1_0946	0.3323	0.000337716
	Q2YK94	Cupin domain OS=Brucella abortus (strain 2308) OX=359391 GN=BAB2_0770 PE=4 SV=1	BAB2_0770	0.6465	0.00341168
	Q2YIU4	Molybdopterin oxidoreductase:Molydopterin dinucleotide binding domain OS=Brucella abortus (strain 2308) OX=359391 GN=BAB2_0316 PE=3 SV=1	BAB2_0316	0.6198	0.0011459
	Q2YL40	Uncharacterized protein OS=Brucella abortus (strain 2308) OX=359391 GN=BAB2_0450 PE=4 SV=1	BAB2_0450	0.6593	0.0219295
	Q2YL44	Proline-rich extensin OS=Brucella abortus (strain 2308) OX=359391 GN=BAB2_0446 PE=4 SV=1	BAB2_0446	0.0598	0.000807281
	Q2YNI0	Uncharacterized protein OS=Brucella abortus (strain 2308) OX=359391 GN=BAB1_0878 PE=4 SV=1	BAB1_0878	0.477	0.0393187
	Q2YMP7	Perosamine synthetase WbkB OS=Brucella abortus (strain 2308) OX=359391 GN=BAB1_0541 PE=4 SV=1	BAB1_0541	0.2383	0.000202734
	Q2YIT0	Band 7 protein:Stomatin OS=Brucella abortus (strain 2308) OX=359391 GN=BAB2_0074 PE=4 SV=1	BAB2_0074	0.3018	5.91281e-06
	Q57DI8	Ferritin-like domain-containing protein(predicted) OS=Brucella abortus biovar 1 (strain 9-941) OX=262698 GN=BruAb1_0932 PE=4 SV=1	BruAb1_0932	0.1776	9.94728e-05
	Q2YMZ2	Antifreeze protein, type I OS=Brucella abortus (strain 2308) OX=359391 GN=BAB1_0655 PE=4 SV=1	BAB1_0655	0.4374	0.000500565
	Q2YLH1	Aldehyde dehydrogenase OS=Brucella abortus (strain 2308) OX=359391 GN=BAB1_1823 PE=4 SV=1	BAB1_1823	0.3288	0.000135286
	Q2YIW0	30S ribosomal protein S21 OS=Brucella abortus (strain 2308) OX=359391 GN=rpsU PE=3 SV=1	rpsU	0.3086	3.11915e-05
	Q2YJ50	HTH-type quorum sensing-dependent transcriptional regulator VjbR OS=Brucella abortus (strain 2308) OX=359391 GN=vjbR PE=1 SV=1	vjbR	0.1911	0.00224037
	Q2YMI3	Ribonuclease H OS=Brucella abortus (strain 2308) OX=359391 GN=rnhA PE=3 SV=1	rnhA	0.3496	0.00123384
	Q2YQ05	Putative membrane protein insertion efficiency factor OS=Brucella abortus (strain 2308) OX=359391 GN=BAB1_1095 PE=3 SV=1	BAB1_1095	0.4446	0.000455684
	Q2YJZ2	Protein NrdI OS=Brucella abortus (strain 2308) OX=359391 GN=nrdI PE=3 SV=1	nrdI	0.4134	0.00783414
	Q2YLR9	Malate dehydrogenase OS=Brucella abortus (strain 2308) OX=359391 GN=mdh PE=1 SV=1	mdh	0.5471	1.81436e-05
	Q2YPP6	ErfK/YbiS/YcfS/YnhG:Twin-arginine translocation pathway signal OS=Brucella abortus (strain 2308) OX=359391 GN=BAB1_0047 PE=3 SV=1	BAB1_0047	0.5886	0.000667036
	Q2YQ08	Uncharacterized protein OS=Brucella abortus (strain 2308) OX=359391 GN=BAB1_1092 PE=4 SV=1	BAB1_1092	0.2556	3.82532e-05
	Q2YQN5	Lectin-like protein BA14k OS=Brucella abortus (strain 2308) OX=359391 GN=BAB1_1396 PE=3 SV=1	BAB1_1396	0.437	0.0202694
	Q2YNP7	NADH:ubiquinone oxidoreductase 17.2 kD subunit OS=Brucella abortus (strain 2308) OX=359391 GN=BAB1_0920 PE=4 SV=1	BAB1_0920	0.3684	3.96208e-06
	Q2YNU3	Uncharacterized protein OS=Brucella abortus (strain 2308) OX=359391 GN=BAB1_0088 PE=4 SV=1	BAB1_0088	0.3444	4.57794e-05
	Q2YNQ5	Uncharacterized protein OS=Brucella abortus (strain 2308) OX=359391 GN=BAB1_0948 PE=3 SV=1	BAB1_0948	0.4701	4.61755e-05
	Q2YMC0	Uncharacterized protein OS=Brucella abortus (strain 2308) OX=359391 GN=BAB1_0418 PE=4 SV=1	BAB1_0418	0.0511	0.0298061
	Q2YQ99	Uncharacterized protein OS=Brucella abortus (strain 2308) OX=359391 GN=BAB1_1632 PE=4 SV=1	BAB1_1632	0.3772	0.00476002
	Q2YND2	Uncharacterized protein OS=Brucella abortus (strain 2308) OX=359391 GN=BAB1_0819 PE=4 SV=1	BAB1_0819	0.3595	0.000622834
	Q2YPU6	ErfK/YbiS/YcfS/YnhG OS=Brucella abortus (strain 2308) OX=359391 GN=BAB1_1159 PE=3 SV=1	BAB1_1159	0.039	6.11997e-06
	Q2YMB1	SAM (And some other nucleotide) binding motif:Site-specific DNA-methyltransferase (Cytosine-N4-specific):N-6 Adenine-specific OS=Brucella abortus (strain 2308) OX=359391 GN=BAB1_0427 PE=4 SV=1	BAB1_0427	0.6189	0.0385508
	Q2YQE8	Calcium-binding EF-hand OS=Brucella abortus (strain 2308) OX=359391 GN=BAB1_1355 PE=4 SV=1	BAB1_1355	0.1724	0.000181962
	Q2YIN0	Beta-lactamase OS=Brucella abortus (strain 2308) OX=359391 GN=BAB2_0257 PE=4 SV=1	BAB2_0257	0.0724	0.00841649
	Q2YLX1	H+-transporting two-sector ATPase, A subunit:ATP/GTP-binding site motif A (P-loop):ABC transporter:AAA ATPase OS=Brucella abortus (strain 2308) OX=359391 GN=BAB1_1766 PE=3 SV=1	BAB1_1766	0.6098	0.00282182
	Q2YMB0	DUF2007 domain-containing protein OS=Brucella abortus (strain 2308) OX=359391 GN=BAB1_0428 PE=4 SV=1	BAB1_0428	0.3343	0.0105171
	Q2YIS1	Uncharacterized protein OS=Brucella abortus (strain 2308) OX=359391 GN=BAB2_0170 PE=4 SV=1	BAB2_0170	0.009	0.000132879
	Q2YIP3	Response regulator receiver:Sigma-54 factor interaction domain:Helix-turn-helix, Fis-type:AAA ATPase OS=Brucella abortus (strain 2308) OX=359391 GN=BAB2_0081 PE=4 SV=1	BAB2_0081	0.5715	0.00158341
	Q2YMJ9	Uncharacterized protein OS=Brucella abortus (strain 2308) OX=359391 GN=BAB1_0519 PE=4 SV=1	BAB1_0519	0.6581	0.0108867
	Q2YR66	Uncharacterized protein OS=Brucella abortus (strain 2308) OX=359391 GN=BAB1_2003 PE=4 SV=1	BAB1_2003	0.102	6.87669e-05
	Q2YRC6	Sel1-like repeat OS=Brucella abortus (strain 2308) OX=359391 GN=BAB1_1720 PE=4 SV=1	BAB1_1720	0.3283	0.00028304
	Q578I6	Iron compound ABC transporter, periplasmic iron compound-binding protein, hypothetical OS=Brucella abortus biovar 1 (strain 9-941) OX=262698 GN=BruAb2_0530 PE=4 SV=1	BruAb2_0530	0.008	2.42571e-07
	Q57D67	Putative NAD(P)H nitroreductase OS=Brucella abortus biovar 1 (strain 9-941) OX=262698 GN=BruAb1_1074 PE=3 SV=1	BruAb1_1074	0.5621	9.83972e-05
	Q57B03	SAM (And some other nucleotide) binding motif(predicted) OS=Brucella abortus biovar 1 (strain 9-941) OX=262698 GN=BruAb1_1869 PE=4 SV=1	BruAb1_1869	0.2827	5.15935e-05
	Q576Q3	Peptide chain release factor 3 OS=Brucella abortus biovar 1 (strain 9-941) OX=262698 GN=prfC PE=3 SV=1	prfC	0.2766	1.50199e-05
	Q57CU4	ThiJ/PfpI family protein OS=Brucella abortus biovar 1 (strain 9-941) OX=262698 GN=BruAb1_1202 PE=3 SV=1	BruAb1_1202	0.3933	9.37582e-05
	Q577B5	Nitrite extrusion protein OS=Brucella abortus biovar 1 (strain 9-941) OX=262698 GN=BruAb2_0881 PE=3 SV=1	BruAb2_0881	0.601	0.000728599
	Q577K9	Peptide methionine sulfoxide reductase MsrB OS=Brucella abortus biovar 1 (strain 9-941) OX=262698 GN=msrB PE=3 SV=1	msrB	0.4096	3.02054e-05
	Q577S8	2-oxoisovalerate dehydrogenase E1 component, beta subunit OS=Brucella abortus biovar 1 (strain 9-941) OX=262698 GN=BruAb2_0699 PE=4 SV=1	BruAb2_0699	0.0826	0.00140082
	Q577E4	Uncharacterized protein OS=Brucella abortus biovar 1 (strain 9-941) OX=262698 GN=BruAb2_0849 PE=4 SV=1	BruAb2_0849	0.3086	3.61935e-05
	Q57EH4	Transporter OS=Brucella abortus biovar 1 (strain 9-941) OX=262698 GN=BruAb1_0581 PE=3 SV=1	BruAb1_0581	0.6376	0.000290339
	Q57CM4	D-alanine--D-alanine ligase OS=Brucella abortus biovar 1 (strain 9-941) OX=262698 GN=ddlA PE=3 SV=1	ddlA	0.2411	5.14975e-06
	Q57C71	Predicted secreted (Periplasmic) protein(predicted) OS=Brucella abortus biovar 1 (strain 9-941) OX=262698 GN=BruAb1_1433 PE=4 SV=1	BruAb1_1433	0.3626	0.0135422
	Q57BE0	Uncharacterized conserved small protein containing a coiled-coil domain(predicted) OS=Brucella abortus biovar 1 (strain 9-941) OX=262698 GN=BruAb1_1726 PE=4 SV=1	BruAb1_1726	0.6609	0.0126919
	Q57F37	Glycosyl transferase, family 25 OS=Brucella abortus biovar 1 (strain 9-941) OX=262698 GN=BruAb1_0347 PE=4 SV=1	BruAb1_0347	0.352	2.87221e-05
	Q57F59	Pollen allergen Poa pIX/Phl pVI, C-terminal(predicted) OS=Brucella abortus biovar 1 (strain 9-941) OX=262698 GN=BruAb1_0325 PE=4 SV=1	BruAb1_0325	0.5901	0.00354464
	Q57AY1	GumN family protein(predicted) OS=Brucella abortus biovar 1 (strain 9-941) OX=262698 GN=BruAb1_1893 PE=4 SV=1	BruAb1_1893	0.4586	0.000387657
	Q57C93	SCO1/SenC family protein OS=Brucella abortus biovar 1 (strain 9-941) OX=262698 GN=BruAb1_1411 PE=3 SV=1	BruAb1_1411	0.2367	0.00218131
	Q57BQ0	PepSY domain-containing protein OS=Brucella abortus biovar 1 (strain 9-941) OX=262698 GN=BruAb1_1612 PE=4 SV=1	BruAb1_1612	0.3507	0.0254016
	Q57BX0	Purine nucleoside permease OS=Brucella abortus biovar 1 (strain 9-941) OX=262698 GN=BruAb1_1536 PE=4 SV=1	BruAb1_1536	0.4058	0.000499114
	Q579B5	tRNA_edit domain-containing protein OS=Brucella abortus biovar 1 (strain 9-941) OX=262698 GN=BruAb2_0338 PE=3 SV=1	BruAb2_0338	0.0597	1.74372e-05
	Q2YM69	UDP-N-acetylmuramoylalanine--D-glutamate ligase OS=Brucella abortus (strain 2308) OX=359391 GN=murD PE=3 SV=1	murD	0.382	5.22682e-05
	Q57E02	zf-CHCC domain-containing protein OS=Brucella abortus biovar 1 (strain 9-941) OX=262698 GN=BruAb1_0764 PE=4 SV=1	BruAb1_0764	0.0702	5.30206e-06
	Q579Y7	DUF1007 family protein(predicted) OS=Brucella abortus biovar 1 (strain 9-941) OX=262698 GN=BruAb2_0096 PE=4 SV=1	BruAb2_0096	0.2317	0.000272127
	Q579K1	WD-repeat family protein OS=Brucella abortus biovar 1 (strain 9-941) OX=262698 GN=BruAb2_0246 PE=4 SV=1	BruAb2_0246	0.5804	3.89124e-05
	Q57D09	Septum formation initiator(predicted) OS=Brucella abortus biovar 1 (strain 9-941) OX=262698 GN=BruAb1_1136 PE=4 SV=1	BruAb1_1136	0.1599	0.00602786
	Q57EM5	Twin-arginine translocation signal domain protein OS=Brucella abortus biovar 1 (strain 9-941) OX=262698 GN=BruAb1_0518 PE=3 SV=1	BruAb1_0518	0.5097	0.00144104
	Q57B00	DNA translocase FtsK OS=Brucella abortus biovar 1 (strain 9-941) OX=262698 GN=BruAb1_1872 PE=3 SV=1	BruAb1_1872	0.3149	3.88224e-06
	Q57ES6	LysM domain protein OS=Brucella abortus biovar 1 (strain 9-941) OX=262698 GN=BruAb1_0463 PE=4 SV=1	BruAb1_0463	0.1681	8.84385e-06
	Q57DJ9	TPR_REGION domain-containing protein OS=Brucella abortus biovar 1 (strain 9-941) OX=262698 GN=BruAb1_0921 PE=4 SV=1	BruAb1_0921	0.0847	1.04364e-05
	Q57BD8	DUF465 domain-containing protein(predicted) OS=Brucella abortus biovar 1 (strain 9-941) OX=262698 GN=BruAb1_1728 PE=4 SV=1	BruAb1_1728	0.3199	0.0203394
	Q57E67	Hydrolase(predicted) OS=Brucella abortus biovar 1 (strain 9-941) OX=262698 GN=BruAb1_0692 PE=4 SV=1	BruAb1_0692	0.0194	1.1819e-05
	Q57DC7	Hydrolase, haloacid dehalogenase-like family OS=Brucella abortus biovar 1 (strain 9-941) OX=262698 GN=BruAb1_1007 PE=4 SV=1	BruAb1_1007	0.194	0.0323901
	Q576S8	DNA recombination protein RmuC homolog OS=Brucella abortus biovar 1 (strain 9-941) OX=262698 GN=BruAb2_0976 PE=3 SV=1	BruAb2_0976	0.5866	0.0356185
	Q57EP2	DsbC domain-containing protein OS=Brucella abortus biovar 1 (strain 9-941) OX=262698 GN=BruAb1_0501 PE=4 SV=1	BruAb1_0501	0.0336	2.26929e-06
	Q57A10	Sugar isomerase, KpsF/GutQ OS=Brucella abortus biovar 1 (strain 9-941) OX=262698 GN=BruAb2_0073 PE=3 SV=1	BruAb2_0073	0.5561	6.96321e-05
	Q57DJ8	Aminotransferase, class I OS=Brucella abortus biovar 1 (strain 9-941) OX=262698 GN=BruAb1_0922 PE=4 SV=1	BruAb1_0922	0.3714	1.87681e-05
	Q57DZ7	Hypothetical cytosolic protein(predicted) OS=Brucella abortus biovar 1 (strain 9-941) OX=262698 GN=BruAb1_0769 PE=4 SV=1	BruAb1_0769	0.3555	0.000167241
	Q57FP3	Acetyltransferase, GNAT family OS=Brucella abortus biovar 1 (strain 9-941) OX=262698 GN=BruAb1_0126 PE=4 SV=1	BruAb1_0126	0.1553	2.93639e-05
	Q576D0	Coproporphyrinogen-III oxidase OS=Brucella abortus biovar 1 (strain 9-941) OX=262698 GN=hemN-2 PE=3 SV=1	hemN-2	0.4807	0.00135745
	Q579R5	GlcD, glycolate oxidase, subunit GlcD OS=Brucella abortus biovar 1 (strain 9-941) OX=262698 GN=glcD PE=4 SV=1	glcD	0.2204	0.000619598
	Q57CM1	Aminotransferase OS=Brucella abortus biovar 1 (strain 9-941) OX=262698 GN=BruAb1_1276 PE=3 SV=1	BruAb1_1276	0.5966	6.66068e-05
	Q577Y5	Conserved domain protein OS=Brucella abortus biovar 1 (strain 9-941) OX=262698 GN=BruAb2_0638 PE=4 SV=1	BruAb2_0638	0.0277	1.79011e-05
	Q579Z9	2-dehydro-3-deoxy-phosphogluconate aldolase OS=Brucella abortus biovar 1 (strain 9-941) OX=262698 GN=BruAb2_0084 PE=3 SV=1	BruAb2_0084	0.0572	7.44206e-07
	Q57C96	DNA helicase OS=Brucella abortus biovar 1 (strain 9-941) OX=262698 GN=BruAb1_1408 PE=4 SV=1	BruAb1_1408	0.3244	0.00056879
	Q57DH8	FeS assembly protein SufD(predicted) OS=Brucella abortus biovar 1 (strain 9-941) OX=262698 GN=BruAb1_0942 PE=3 SV=1	BruAb1_0942	0.5918	0.00194493
	Q57FA4	DNA gyrase inhibitor YacG OS=Brucella abortus biovar 1 (strain 9-941) OX=262698 GN=yacG PE=3 SV=1	yacG	0.0769	0.000446615
	Q576U1	Ribonuclease P protein component OS=Brucella abortus biovar 1 (strain 9-941) OX=262698 GN=rnpA PE=3 SV=1	rnpA	0.5271	0.00307498
	Q57FM0	OstA-like_N domain-containing protein OS=Brucella abortus biovar 1 (strain 9-941) OX=262698 GN=BruAb1_0152 PE=4 SV=1	BruAb1_0152	0.5875	1.3193e-05
	Q57FN5	Lipoprotein, hypothetical OS=Brucella abortus biovar 1 (strain 9-941) OX=262698 GN=BruAb1_0136 PE=3 SV=1	BruAb1_0136	0.3365	1.7288e-05
	Q578V1	Possible regulatory protein BirS(predicted) OS=Brucella abortus biovar 1 (strain 9-941) OX=262698 GN=BruAb2_0404 PE=4 SV=1	BruAb2_0404	0.4548	0.00313672
	Q578Y3	DUF2291 domain-containing protein(predicted) OS=Brucella abortus biovar 1 (strain 9-941) OX=262698 GN=BruAb2_0370 PE=4 SV=1	BruAb2_0370	0.171	1.13013e-06
	Q577G2	Cytochrome c family protein OS=Brucella abortus biovar 1 (strain 9-941) OX=262698 GN=BruAb2_0829 PE=4 SV=1	BruAb2_0829	0.0515	2.33757e-05
	Q57EB3	DUF2147 domain-containing protein OS=Brucella abortus biovar 1 (strain 9-941) OX=262698 GN=BruAb1_0646 PE=4 SV=1	BruAb1_0646	0.4793	0.00685729
	Q57EZ4	Twin-arginine translocation signal domain protein OS=Brucella abortus biovar 1 (strain 9-941) OX=262698 GN=BruAb1_0392 PE=3 SV=1	BruAb1_0392	0.2665	0.00802727
	Q57EM1	Chitooligosaccharide deacetylase OS=Brucella abortus biovar 1 (strain 9-941) OX=262698 GN=BruAb1_0523 PE=3 SV=1	BruAb1_0523	0.2737	1.01383e-05
	Q57E71	TIGR02301 family protein(predicted) OS=Brucella abortus biovar 1 (strain 9-941) OX=262698 GN=BruAb1_0688 PE=4 SV=1	BruAb1_0688	0.0442	0.00247784
	Q57FH5	DUF779 domain-containing protein(predicted) OS=Brucella abortus biovar 1 (strain 9-941) OX=262698 GN=BruAb1_0199 PE=4 SV=1	BruAb1_0199	0.3624	0.00592403
	Q57AN3	DnaJ domain protein OS=Brucella abortus biovar 1 (strain 9-941) OX=262698 GN=BruAb1_1999 PE=4 SV=1	BruAb1_1999	0.4101	0.000212397
	Q577A7	SCP2 domain-containing protein OS=Brucella abortus biovar 1 (strain 9-941) OX=262698 GN=BruAb2_0890 PE=4 SV=1	BruAb2_0890	0.2333	0.000139192
	Q57AD3	DUF1330 domain-containing protein OS=Brucella abortus biovar 1 (strain 9-941) OX=262698 GN=BruAb1_2104 PE=4 SV=1	BruAb1_2104	0.4457	0.0371165
	Q57D00	Parvulin-like PPIase OS=Brucella abortus biovar 1 (strain 9-941) OX=262698 GN=BruAb1_1145 PE=3 SV=1	BruAb1_1145	0.5596	3.80641e-06
	Q57BS9	DUF1153 domain-containing protein(predicted) OS=Brucella abortus biovar 1 (strain 9-941) OX=262698 GN=BruAb1_1580 PE=4 SV=1	BruAb1_1580	0.3742	0.0159408
	Q57C21	MutT/nudix family protein OS=Brucella abortus biovar 1 (strain 9-941) OX=262698 GN=BruAb1_1485 PE=3 SV=1	BruAb1_1485	0.2339	0.000300955
	Q57B04	EVE domain-containing protein OS=Brucella abortus biovar 1 (strain 9-941) OX=262698 GN=BruAb1_1868 PE=4 SV=1	BruAb1_1868	0.6541	0.00172733
	Q57F36	Urease operon 23 kDa accessory protein(predicted) OS=Brucella abortus biovar 1 (strain 9-941) OX=262698 GN=BruAb1_0348 PE=4 SV=1	BruAb1_0348	0.1626	9.51665e-05
	Q57AF1	Uncharacterized protein OS=Brucella abortus biovar 1 (strain 9-941) OX=262698 GN=BruAb1_2084 PE=4 SV=1	BruAb1_2084	0.1975	0.000890016
	Q577Q0	Uncharacterized protein OS=Brucella abortus biovar 1 (strain 9-941) OX=262698 GN=BruAb2_0728 PE=4 SV=1	BruAb2_0728	0.2854	0.000338994
	Q57DS6	Hypothetical exported protein(predicted) OS=Brucella abortus biovar 1 (strain 9-941) OX=262698 GN=BruAb1_0841 PE=4 SV=1	BruAb1_0841	0.5472	0.0023001
	Q57AR5	DUF2125 domain-containing protein(predicted) OS=Brucella abortus biovar 1 (strain 9-941) OX=262698 GN=BruAb1_1965 PE=4 SV=1	BruAb1_1965	0.5988	0.00493188
	Q57FT5	RNA 2',3'-cyclic phosphodiesterase OS=Brucella abortus biovar 1 (strain 9-941) OX=262698 GN=BruAb1_0082 PE=3 SV=1	BruAb1_0082	0.4485	0.0222918
	Q2YJB6	Putative binding protein BAB2_1146 OS=Brucella abortus (strain 2308) OX=359391 GN=BAB2_1146 PE=3 SV=1	BAB2_1146	0.154	3.26609e-06
other | Extracellular	Q2YLM4	tRNA N6-adenosine threonylcarbamoyltransferase OS=Brucella abortus (strain 2308) OX=359391 GN=tsaD PE=3 SV=1	tsaD	0.5192	0.00435048
other | OuterMembrane	Q2YNR1	RNA-binding region RNP-1 (RNA recognition motif) OS=Brucella abortus (strain 2308) OX=359391 GN=BAB1_0942 PE=4 SV=1	BAB1_0942	0.6479	0.0123108
	Q57DL9	Peptidase, M23/M37 family OS=Brucella abortus biovar 1 (strain 9-941) OX=262698 GN=BruAb1_0900 PE=4 SV=1	BruAb1_0900	0.4681	0.00523746
	Q57BI7	Cell division coordinator CpoB OS=Brucella abortus biovar 1 (strain 9-941) OX=262698 GN=cpoB PE=3 SV=1	cpoB	0.0319	0.000140431
	Q57DM9	SPOR domain-containing protein OS=Brucella abortus biovar 1 (strain 9-941) OX=262698 GN=BruAb1_0890 PE=4 SV=1	BruAb1_0890	0.2472	9.84288e-07
